# Supplementary material for: In vitro Anti-Hantavirus Activity of Protein Kinase Inhibitor 8G1 Targeting AKT/mTOR/eIF4E Signaling Pathway
Source: Front Microbiol. 2022 Jun 30;13:880258. doi: 10.3389/fmicb.2022.880258 (PMC9279581; doi:10.3389/fmicb.2022.880258)
Supplement: Supplementary file 1 [file Table_1.XLSX]

## Sheet: Sheet1
name	M.w.	Target	DMSO (mg/mL)Max Solubility	DMSO (mM)Max Solubility	water (mg/mL)Max Solubility	water (mM)Max Solubility	Information	Pathway	Formula
Linifanib (ABT-869)	375.41	CSF-1R,PDGFR,VEGFR	75	199.782	<1		Linifanib (ABT-869) is a novel, potent ATP-competitive VEGFR/PDGFR inhibitor for KDR, CSF-1R, Flt-1/3 and PDGFRβ with IC50 of 4 nM, 3 nM, 3 nM/4 nM and 66 nM respectively, mostly effective in mutant kinase-dependent cancer cells (i.e. FLT3). Phase 3.	Protein Tyrosine Kinase	C21H18FN5O
Axitinib	386.47	c-Kit,PDGFR,VEGFR	35	90.5633	<1		Axitinib is a multi-target inhibitor of VEGFR1, VEGFR2, VEGFR3, PDGFRβ and c-Kit with IC50 of 0.1 nM, 0.2 nM, 0.1-0.3 nM, 1.6 nM and 1.7 nM in Porcine aorta endothelial cells, respectively.	Protein Tyrosine Kinase	C22H18N4OS
Saracatinib (AZD0530)	542.03	Src	35	64.5721	<1		Saracatinib (AZD0530) is a potent Src inhibitor with IC50 of 2.7 nM in cell-free assays, and potent to c-Yes, Fyn, Lyn, Blk, Fgr and Lck less active for Abl and EGFR (L858R and L861Q). Phase 2/3.	Angiogenesis	C27H32ClN5O5
Selumetinib (AZD6244)	457.68	MEK	91	198.829	<1		Selumetinib (AZD6244) is a potent, highly selective MEK inhibitor with IC50 of 14 nM for MEK1 and Kd value of 530 nM for MEK2. It also inhibits ERK1/2 phosphorylation with IC50 of 10 nM, no inhibition to p38α, MKK6, EGFR, ErbB2, ERK2, B-Raf, etc. Phase 3.	MAPK	C17H15BrClFN4O3
Nintedanib (BIBF 1120)	539.62	FGFR,PDGFR,VEGFR	6	11.1189	<1		Nintedanib (BIBF 1120) is a potent triple angiokinase inhibitor for VEGFR1/2/3, FGFR1/2/3 and PDGFRα/β with IC50 of 34 nM/13 nM/13 nM, 69 nM/37 nM/108 nM and 59 nM/65 nM in cell-free assays. Phase 3.	Protein Tyrosine Kinase	C31H33N5O4
Afatinib (BIBW2992)	485.94	EGFR,HER2	97	199.613	<1		Afatinib (BIBW2992) inhibits EGFR/ErbB irreversibly in vitro with IC50 of 0.5, 0.4, 10, 14, 1 nM for EGFRwt, EGFR L858R , EGFR L858R/T790M ErbB2 (HER2) and ErbB4 (HER4), respectively.	Protein Tyrosine Kinase	C24H25ClFN5O3
BMS-536924	479.96	IGF-1R	96	200.017	<1		BMS-536924 is an ATP-competitive IGF-1R/IR inhibitor with IC50 of 100 nM/73 nM, modest activity for Mek, Fak, and Lck with very little activity for Akt1, MAPK1/2.	Protein Tyrosine Kinase	C25H26ClN5O3
Bosutinib (SKI-606)	530.45	Src	100	188.519	<1		Bosutinib (SKI-606) is a novel, dual Src/Abl inhibitor with IC50 of 1.2 nM and 1 nM in cell-free assays, respectively.	Angiogenesis	C26H29Cl2N5O3
Cediranib (AZD2171)	450.51	VEGFR	90	199.774	<1		Cediranib (AZD2171) is a highly potent VEGFR(KDR) inhibitor with IC50 of <1 nM, also inhibits Flt1/4 with IC50 of 5 nM/≤3 nM, similar activity against c-Kit and PDGFRβ, 36-, 110-fold and >1000-fold selective more for VEGFR than PDGFR-α, CSF-1R and Flt3 in HUVEC cells. Phase 3.	Protein Tyrosine Kinase	C25H27FN4O3
Dovitinib (TKI-258, CHIR-258)	392.43	c-Kit,FGFR,FLT3,PDGFR,VEGFR	30	76.4468	<1		Dovitinib (TKI258, CHIR258) is a multitargeted RTK inhibitor, mostly for class III (FLT3/c-Kit) with IC50 of 1 nM/2 nM, also potent to class IV (FGFR1/3) and class V (VEGFR1-4) RTKs with IC50 of 8-13 nM, less potent to InsR, EGFR, c-Met, EphA2, Tie2, IGF-1R and HER2 in cell-free assays. Phase 4.	Angiogenesis	C21H21FN6O
PD184352 (CI-1040)	478.67	MEK	96	200.556	<1		PD184352 (CI-1040) is an ATP non-competitive MEK1/2 inhibitor with IC50 of 17 nM in cell-based assays, 100-fold more selective for MEK1/2 than MEK5. Phase 2.	MAPK	C17H14ClF2IN2O2
Dasatinib	488.01	Bcr-Abl,c-Kit,Src	98	200.816	<1		Dasatinib is a novel, potent and multi-targeted inhibitor that targets Abl, Src and c-Kit, with IC50 of <1 nM, 0.8 nM and 79 nM in cell-free assays, respectively.	Angiogenesis	C22H26ClN7O2S
Ridaforolimus (Deforolimus, MK-8669)	990.21	mTOR	198	199.958	<1		Ridaforolimus (Deforolimus, MK-8669) is a selective mTOR inhibitor with IC50 of 0.2 nM in HT-1080 cell line while not classified as a prodrug, mTOR inhibition and FKBP12 binding is similar to rapamycin. Phase 3.	PI3K/Akt/mTOR	C53H84NO14P
Gefitinib (ZD1839)	446.9	EGFR	89	199.15	<1		Gefitinib (ZD-1839) is an EGFR inhibitor for Tyr1173, Tyr992, Tyr1173 and Tyr992 in the NR6wtEGFR and NR6W cells with IC50 of 37 nM, 37nM, 26 nM and 57 nM, respectively.	Protein Tyrosine Kinase	C22H24ClFN4O3
Imatinib Mesylate (STI571)	589.71	Bcr-Abl,c-Kit,PDGFR	118	200.098	118	200.098	Imatinib Mesylate (STI571) is an orally bioavailability mesylate salt of Imatinib, which is a multi-target inhibitor of v-Abl, c-Kit and PDGFR with IC50 of 0.6 μM, 0.1 μM and 0.1 μM in cell-free or cell-based assays, respectively.	Protein Tyrosine Kinase	C30H35N7O4S
Lapatinib (GW-572016) Ditosylate	925.46	EGFR,HER2	100	108.054	<1		Lapatinib (GW-572016) Ditosylate is a potent EGFR and ErbB2 inhibitor with IC50 of 10.8 and 9.2 nM in cell-free assays, respectively.	Protein Tyrosine Kinase	C43H42ClFN4O10S3
Motesanib Diphosphate (AMG-706)	569.44	VEGFR,PDGFR,c-Kit	100	175.611	19	33.3661	Motesanib Diphosphate (AMG-706) is a potent ATP-competitive inhibitor of VEGFR1/2/3 with IC50 of 2 nM/3 nM/6 nM, respectively similar activity against Kit, ~10-fold more selective for VEGFR than PDGFR and Ret. Phase 3.	Protein Tyrosine Kinase	C22H29N5O9P2
Nilotinib (AMN-107)	529.52	Bcr-Abl	27	50.9896	<1		Nilotinib (AMN-107) is a selective Bcr-Abl inhibitor with IC50 less than 30 nM in Murine myeloid progenitor cells.	Angiogenesis	C28H22F3N7O
Pazopanib HCl (GW786034 HCl)	473.98	c-Kit,PDGFR,VEGFR	17	35.8665	<1		Pazopanib HCl (GW786034 HCl) is a novel multi-target inhibitor of VEGFR1, VEGFR2, VEGFR3, PDGFR, FGFR, c-Kit and c-Fms with IC50 of 10 nM, 30 nM, 47 nM, 84 nM, 74 nM, 140 nM and 146 nM in cell-free assays, respectively.	Protein Tyrosine Kinase	C21H24ClN7O2S
PD0325901	482.19	MEK	96	199.092	<1		PD0325901 is a selective and non ATP-competitive MEK inhibitor with IC50 of 0.33 nM in cell-free assays, roughly 500-fold more potent than CI-1040 on phosphorylation of ERK1 and ERK2. Phase 2.	MAPK	C16H14F3IN2O4
PI-103	348.36	Autophagy,DNA-PK,mTOR,PI3K	24	68.8942	<1		PI-103 is a multi-targeted PI3K inhibitor for p110α/β/δ/γ with IC50 of 2 nM/3 nM/3 nM/15 nM in cell-free assays, less potent to mTOR/DNA-PK with IC50 of 30 nM/23 nM.	PI3K/Akt/mTOR	C19H16N4O3
Rapamycin (Sirolimus)	914.18	Autophagy,mTOR	20	21.8775	<1		Rapamycin (Sirolimus) is a specific mTOR inhibitor with IC50 of ~0.1 nM HEK293 cells.	PI3K/Akt/mTOR	C51H79NO13
Sorafenib Tosylate	637.03	PDGFR,Raf,VEGFR	127	199.363	0.01	0.0156978	Sorafenib Tosylate is a multikinase inhibitor of Raf-1, B-Raf and VEGFR-2 with IC50 of 6 nM, 22 nM and 90 nM in cell-free assays, respectively.	MAPK	C28H24ClF3N4O6S
Sunitinib Malate	532.56	c-Kit,PDGFR,VEGFR	15	28.1658	<1		Sunitinib Malate is a multi-targeted RTK inhibitor targeting VEGFR2 (Flk-1) and PDGFRβ with IC50 of 80 nM and 2 nM in cell-free assays, and also inhibits c-Kit.	Protein Tyrosine Kinase	C26H33FN4O7
Temsirolimus (CCI-779, NSC 683864)	1030.29	mTOR	67	65.0302	<1		Temsirolimus (CCI-779, NSC 683864) is a specific mTOR inhibitor with IC50 of 1.76 μM in a cell-free assay.	PI3K/Akt/mTOR	C56H87NO16
Tozasertib (VX-680, MK-0457)	464.59	Aurora Kinase	93	200.176	<1		Tozasertib (VX-680, MK-0457) is a pan-Aurora inhibitor, mostly against Aurora A with Kiapp of 0.6 nM in a cell-free assay, less potent towards Aurora B/Aurora C and 100-fold more selective for Aurora A than 55 other kinases. Phase 2.	Cell Cycle	C23H28N8OS
Y-27632 2HCl	320.26	Autophagy,ROCK	64	199.838	14	43.7145	Y-27632 2HCl is a selective ROCK1 (p160ROCK) inhibitor with Ki of 140 nM in a cell-free assay, exhibits >200-fold selectivity over other kinases, including PKC, cAMP-dependent protein kinase, MLCK and PAK.	Cell Cycle	C14H23Cl2N3O
Enzastaurin (LY317615)	515.61	PKC	30	58.1835	<1		Enzastaurin (LY317615) is a potent PKCβ selective inhibitor with IC50 of 6 nM in cell-free assays, 6- to 20-fold selectivity against PKCα, PKCγ and PKCε. Phase 3.	TGF-beta/Smad	C32H29N5O2
AC480 (BMS-599626)	530.55	EGFR,HER2	113	212.987	<1		AC480 (BMS-599626) is a selective and efficacious inhibitor of HER1 and HER2 with IC50 of 20 nM and 30 nM, ~8-fold less potent to HER4, >100-fold to VEGFR2, c-Kit, Lck, MET etc. Phase 1.	Protein Tyrosine Kinase	C27H27FN8O3
Masitinib (AB1010)	498.64	c-Kit,PDGFR	100	200.545	<1		Masitinib is a novel inhibitor for Kit and PDGFRα/β with IC50 of 200 nM and 540 nM/800 nM, weak inhibition to ABL and c-Fms. Phase 3.	Protein Tyrosine Kinase	C28H30N6OS
Pictilisib (GDC-0941)	513.64	PI3K	44	85.6631	<1		Pictilisib (GDC-0941) is a potent inhibitor of PI3Kα/δ with IC50 of 3 nM in cell-free assays, with modest selectivity against p110β (11-fold) and p110γ (25-fold). Phase 2.	PI3K/Akt/mTOR	C23H27N7O3S2
SL-327	335.35	MEK	67	199.791	<1		SL327 is a selective inhibitor for MEK1/2 with IC50 of 0.18 μM/ 0.22 μM, no activity towards Erk1, MKK3, MKK4, c-JUN, PKC, PKA, or CamKIIcapable of transport through the blood-brain barrier.	MAPK	C16H12F3N3S
SB431542	384.39	TGF-beta/Smad	76	197.716	<1		SB431542 is a potent and selective inhibitor of ALK5 with IC50 of 94 nM in a cell-free assay, 100-fold more selective for ALK5 than p38 MAPK and other kinases.	TGF-beta/Smad	C22H16N4O3
Crizotinib (PF-02341066)	450.34	ALK,c-Met	9	19.9849	<1		Crizotinib (PF-02341066) is a potent inhibitor of c-Met and ALK with IC50 of 11 nM and 24 nM in cell-based assays, respectively.	Protein Tyrosine Kinase	C21H22Cl2FN5O
PHA-665752	641.61	c-Met	128	199.498	<1		PHA-665752 is a potent, selective and ATP-competitive c-Met inhibitor with IC50 of 9 nM in cell-free assays, >50-fold selectivity for c-Met than RTKs or STKs.	Protein Tyrosine Kinase	C32H34Cl2N4O4S
ZSTK474	417.41	PI3K	21	50.3102	<1		ZSTK474 inhibits class I PI3K isoforms with IC50 of 37 nM in a cell-free assay, mostly PI3Kδ. Phase1/2.	PI3K/Akt/mTOR	C19H21F2N7O2
SB216763	371.22	GSK-3	23	61.9579	<1		SB216763 is a potent and selective GSK-3 inhibitor with IC50 of 34.3 nM for GSK-3α and equally effective at inhibiting human GSK-3β.	PI3K/Akt/mTOR	C19H12Cl2N2O2
SB203580	377.43	p38 MAPK	43	113.928	<1		SB203580 is a p38 MAPK inhibitor with IC50 of 0.3-0.5 μM in THP-1 cells, 10-fold less sensitive to SAPK3(106T) and SAPK4(106T) and blocks PKB phosphorylation with IC50 of 3-5 μM.	MAPK	C21H16FN3OS
SB202190 (FHPI)	331.34	p38 MAPK	66	199.191	<1		SB202190 (FHPI) is a potent p38 MAPK inhibitor targeting p38α/β with IC50 of 50 nM/100 nM in cell-free assays, sometimes used instead of SB 203580 to investigate potential roles for SAPK2a/p38 in vivo.	MAPK	C20H14FN3O
MK-2206 2HCl	480.39	Akt	14	29.143	<1		MK-2206 2HCl is a highly selective inhibitor of Akt1/2/3 with IC50 of 8 nM/12 nM/65 nM in cell-free assays, respectively no inhibitory activities against 250 other protein kinases observed. Phase 2.	PI3K/Akt/mTOR	C25H23Cl2N5O
SU11274	568.09	c-Met	92	161.946	<1		SU11274 is a selective Met inhibitor with IC50 of 10 nM in cell-free assays, no effects on PGDFRβ, EGFR or Tie2.	Protein Tyrosine Kinase	C28H30ClN5O4S
Brivanib (BMS-540215)	370.38	FGFR,VEGFR	74	199.795	<1		Brivanib is an ATP-competitive inhibitor against VEGFR2 with IC50 of 25 nM, moderate potency against VEGFR-1 and FGFR-1, but >240-fold against PDGFR-β. Phase 3.	Protein Tyrosine Kinase	C19H19FN4O3
NVP-ADW742	453.58	IGF-1R	10	22.0468	<1		NVP-ADW742 is an IGF-1R inhibitor with IC50 of 0.17 μM, >16-fold more potent against IGF-1R than InsR little activity to HER2, PDGFR, VEGFR-2, Bcr-Abl and c-Kit.	Protein Tyrosine Kinase	C28H31N5O
Refametinib (RDEA119, Bay 86-9766)	572.34	MEK	100	174.721	<1		Refametinib (RDEA119, Bay 86-9766) is a potent, ATP non-competitive and highly selective inhibitor of MEK1 and MEK2 with IC50 of 19 nM and 47 nM, respectively.	MAPK	C19H20F3IN2O5S
Linsitinib (OSI-906)	421.49	IGF-1R	84	199.293	<1		Linsitinib (OSI-906) is a selective inhibitor of IGF-1R with IC50 of 35 nM in cell-free assays modestly potent to InsR with IC50 of 75 nM, and no activity towards Abl, ALK, BTK, EGFR, FGFR1/2, PKA etc. Phase 3.	Protein Tyrosine Kinase	C26H23N5O
KU-55933 (ATM Kinase Inhibitor)	395.49	ATM/ATR	33	83.4408	<1		KU-55933 (ATM Kinase Inhibitor) is a potent and specific ATM inhibitor with IC50/Ki of 12.9 nM/2.2 nM in cell-free assays, and is highly selective for ATM as compared to DNA-PK, PI3K/PI4K, ATR and mTOR.	DNA Damage	C21H17NO3S2
GSK1904529A	851.96	IGF-1R	124	145.547	<1		GSK1904529A is a selective inhibitor of IGF-1R and IR with IC50 of 27 nM and 25 nM in cell-free assays, >100-fold more selective for IGF-1R/InsR than Akt1/2, Aurora A/B,B-Raf, CDK2, EGFR etc.	Protein Tyrosine Kinase	C44H47F2N9O5S
PF-04217903	372.38	c-Met	5	13.4271	<1		PF-04217903 is a selective ATP-competitive c-Met inhibitor with IC50 of 4.8 nM in A549 cell line, susceptible to oncogenic mutations (no activity to Y1230C mutant). Phase 1.	Protein Tyrosine Kinase	C19H16N8O
MLN8054	476.86	Aurora Kinase	95	199.22	<1		MLN8054 is a potent and selective inhibitor of Aurora A with IC50 of 4 nM in Sf9 insect cell. It is more than 40-fold selective for Aurora A than Aurora B. Phase 1.	Cell Cycle	C25H15ClF2N4O2
Vatalanib (PTK787) 2HCl	419.73	VEGFR	85	202.511	10	23.8248	Vatalanib (PTK787) 2HCl is an inhibitor of VEGFR2/KDR with IC50 of 37 nM in a cell-free assay, less potent against VEGFR1/Flt-1, 18-fold against VEGFR3/Flt-4. Phase 3.	Protein Tyrosine Kinase	C20H17Cl3N4
U0126-EtOH	426.56	MEK	85	199.269	<1		U0126-EtOH is a highly selective inhibitor of MEK1/2 with IC50 of 0.07 μM/0.06 μM in cell-free assays, 100-fold higher affinity for ΔN3-S218E/S222D MEK than PD98059.	MAPK	C20H22N6OS2
ZM 447439	513.59	Aurora Kinase	103	200.549	<1		ZM 447439 is a selective and ATP-competitive inhibitor for Aurora A and Aurora B with IC50 of 110 nM and 130 nM, respectively. It is more than 8-fold selective for Aurora A/B than MEK1, Src, Lck and has little effect against CDK1/2/4, Plk1, Chk1, etc.	Cell Cycle	C29H31N5O4
GDC-0879	334.37	Raf	66	197.386	<1		GDC-0879 is a novel, potent, and selective B-Raf inhibitor with IC50 of 0.13 nM in A375 and Colo205 cells with activity against c-Raf as well no inhibition known to other protein kinases.	MAPK	C19H18N4O2
LY294002	307.34	Autophagy,PI3K	36	117.134	<1		LY294002 is the first synthetic molecule known to inhibit PI3Kα/δ/β with IC50 of 0.5 μM/0.57 μM/0.97 μM in cell-free assays, respectively more stable in solution than Wortmannin, and also blocks autophagosome formation.	PI3K/Akt/mTOR	C19H17NO3
OSU-03012 (AR-12)	460.45	PDK	11	23.8897	<1		OSU-03012 (AR-12) is a potent inhibitor of recombinant PDK-1(phosphoinositide-dependent kinase 1) with IC50 of 5 μM in a cell-free assay and 2-fold increase in potency over OSU-02067.	PI3K/Akt/mTOR	C26H19F3N4O
Danusertib (PHA-739358)	474.55	Aurora Kinase,Bcr-Abl,c-RET,FGFR	95	200.19	<1		Danusertib (PHA-739358) is an Aurora kinase inhibitor for Aurora A/B/C with IC50 of 13 nM/79 nM/61 nM in cell-free assays, modestly potent to Abl, TrkA, c-RET and FGFR1, and less potent to Lck, VEGFR2/3, c-Kit, CDK2, etc. Phase 2.	Cell Cycle	C26H30N6O3
BI 2536	521.66	PLK	21	40.2561	<1		BI2536 is a potent Plk1 inhibitor with IC50 of 0.83 nM in a cell-free assay. It shows 4- and 11-fold greater selectivity against Plk2 and Plk3. Phase 2.	Cell Cycle	C28H39N7O3
Foretinib (GSK1363089)	632.65	c-Met,VEGFR	100	158.065	<1		Foretinib (GSK1363089) is an ATP-competitive inhibitor of HGFR and VEGFR, mostly for Met and KDR with IC50 of 0.4 nM and 0.9 nM in cell-free assays. Less potent against Ron, Flt-1/3/4, Kit, PDGFRα/β and Tie-2, and little activity to FGFR1 and EGFR. Phase 2.	Protein Tyrosine Kinase	C34H34F2N4O6
GSK690693	425.48	Akt	39	91.6612	<1		GSK690693 is a pan-Akt inhibitor targeting Akt1/2/3 with IC50 of 2 nM/13 nM/9 nM in cell-free assays, also sensitive to the AGC kinase family: PKA, PrkX and PKC isozymes. Phase 1.	PI3K/Akt/mTOR	C21H27N7O3
JNJ-38877605	377.35	c-Met	37	98.0522	<1		JNJ-38877605 is an ATP-competitive inhibitor of c-Met with IC50 of 4 nM, 600-fold selective for c-Met than 200 other tyrosine and serine-threonine kinases. Phase 1.	Protein Tyrosine Kinase	C19H13F2N7
Triciribine	320.3	Akt	64	199.813	<1		Triciribine is a DNA synthesis inhibitor, also inhibits Akt in PC3 cell line and HIV-1 in CEM-SS, H9, H9IIIB, U1 cells with IC50 of 130 nM and 20 nM, respectively does not inhibit PI3K/PDK1 5000-fold less active in cells lacking adenosine kinase. Phase 1/2.	PI3K/Akt/mTOR	C13H16N6O4
Cabozantinib (XL184, BMS-907351)	501.51	c-Met,VEGFR	100	199.398	<1		Cabozantinib (XL184, BMS-907351) is a potent VEGFR2 inhibitor with IC50 of 0.035 nM and also inhibits c-Met, Ret, Kit, Flt-1/3/4, Tie2, and AXL with IC50 of 1.3 nM, 4 nM, 4.6 nM, 12 nM/11.3 nM/6 nM, 14.3 nM and 7 nM in cell-free assays, respectively.	Protein Tyrosine Kinase	C28H24FN3O5
Everolimus (RAD001)	958.22	mTOR	100	104.36	<1		Everolimus (RAD001) is an mTOR inhibitor of FKBP12 with IC50 of 1.6-2.4 nM in a cell-free assay.	PI3K/Akt/mTOR	C53H83NO14
BMS-754807	461.49	c-Met,IGF-1R,Trk receptor	92	199.354	<1		BMS-754807 is a potent and reversible inhibitor of IGF-1R/InsR with IC50 of 1.8 nM/1.7 nM in cell-free assays, less potent to Met, Aurora A/B, TrkA/B and Ron, and shows little activity to Flt3, Lck, MK2, PKA, PKC etc. Phase 2.	Protein Tyrosine Kinase	C23H24FN9O
Alisertib (MLN8237)	518.92	Aurora Kinase	27	52.0311	<1		Alisertib (MLN8237) is a selective Aurora A inhibitor with IC50 of 1.2 nM in a cell-free assay. It has >200-fold higher selectivity for Aurora A than Aurora B. Phase 3.	Cell Cycle	C27H20ClFN4O4
AT9283	381.43	Aurora Kinase,Bcr-Abl,JAK	76	199.25	<1		AT9283 is a potent JAK2/3 inhibitor with IC50 of 1.2 nM/1.1 nM in cell-free assays also potent to Aurora A/B, Abl(T315I). Phase 2.	JAK/STAT	C19H23N7O2
Brivanib Alaninate (BMS-582664)	441.46	FGFR,VEGFR	88	199.339	<1		Brivanib alaninate (BMS-582664) is the prodrug of BMS-540215, an ATP-competitive inhibitor against VEGFR2 with IC50 of 25 nM.	Protein Tyrosine Kinase	C22H24FN5O4
AG-490 (Tyrphostin B42)	294.3	EGFR	58	197.078	<1		AG-490 (Tyrphostin B42) is an inhibitor of EGFR with IC50 of 0.1 μM in cell-free assays, 135-fold more selective for EGFR versus ErbB2, also inhibits JAK2 with no activity to Lck, Lyn, Btk, Syk and Src.	Protein Tyrosine Kinase	C17H14N2O3
SNS-032 (BMS-387032)	380.53	CDK	76	199.721	<1		SNS-032 (BMS-387032) has firstly been described as a selective inhibitor of CDK2 with IC50 of 48 nM in cell-free assays and is 10- and 20-fold selective over CDK1/CDK4. It is also found to be sensitive to CDK7/9 with IC50 of 62 nM/4 nM, with little effect on CDK6. Phase 1.	Cell Cycle	C17H24N4O2S2
Barasertib (AZD1152-HQPA)	507.56	Aurora Kinase	102	200.961	<1		Barasertib (AZD1152-HQPA) is a highly selective Aurora B inhibitor with IC50 of 0.37 nM in a cell-free assay, ~3700 fold more selective for Aurora B over Aurora A. Phase 1.	Cell Cycle	C26H30FN7O3
PLX-4720	413.83	Raf	83	200.565	<1		PLX4720 is a potent and selective inhibitor of B-RafV600E with IC50 of 13 nM in a cell-free assay, equally potent to c-Raf-1(Y340D and Y341D mutations), 10-fold selectivity for B-RafV600E than wild-type B-Raf.	MAPK	C17H14ClF2N3O3S
Roscovitine (Seliciclib,CYC202)	354.45	CDK	71	200.31	<1		Roscovitine (Seliciclib, CYC202) is a potent and selective CDK inhibitor for Cdc2, CDK2 and CDK5 with IC50 of 0.65 μM, 0.7 μM and 0.16 μM in cell-free assays. It shows little effect on CDK4/6. Phase 2.	Cell Cycle	C19H26N6O
SNS-314	527.04	Aurora Kinase	105	199.226	6	11.3843	SNS-314 is a potent and selective inhibitor of Aurora A, Aurora B and Aurora C with IC50 of 9 nM, 31 nM, and 3 nM, respectively. It is less potent to Trk A/B, Flt4, Fms, Axl, c-Raf and DDR2. Phase 1.	Cell Cycle	C19H19ClN6O4S3
Lenvatinib (E7080)	426.85	VEGFR	40	93.7097	<1		Lenvatinib (E7080) is a multi-target inhibitor, mostly for VEGFR2(KDR)/VEGFR3(Flt-4) with IC50 of 4 nM/5.2 nM, less potent against VEGFR1/Flt-1, ~10-fold more selective for VEGFR2/3 against FGFR1, PDGFRα/β in cell-free assays. Phase 3.	Protein Tyrosine Kinase	C21H19ClN4O4
CP-724714	469.53	EGFR,HER2	94	200.2	<1		CP-724714 is a potent, selective inhibitor of HER2/ErbB2 with IC50 of 10 nM, >640-fold selectivity against EGFR, InsR, IRG-1R, PDGFR, VEGFR2, Abl, Src, c-Met etc in cell-free assays. Phase 2.	Protein Tyrosine Kinase	C27H27N5O3
TGX-221	364.44	PI3K	12	32.9272	<1		TGX-221 is a p110β-specific inhibitor with IC50 of 5 nM in a cell-free assay, 1000-fold more selective for p110β than p110α.	PI3K/Akt/mTOR	C21H24N4O2
WZ3146	464.95	EGFR	93	200.022	<1		WZ3146 is a mutant-selective irreversible inhibitor of EGFR(L858R) and EGFR(E746_A750) with IC50 of 2 nM and 2 nM does not inhibit ERBB2 phosphorylation (T798I).	Protein Tyrosine Kinase	C24H25ClN6O2
CYC116	368.46	Aurora Kinase,VEGFR	24	65.136	<1		CYC116 is a potent inhibitor of Aurora A/B with Ki of 8.0 nM/9.2 nM, is less potent to VEGFR2 (Ki of 44 nM), with 50-fold greater potency than CDKs, not active against PKA, Akt/PKB, PKC, no effect on GSK-3α/β, CK2, Plk1 and SAPK2A. Phase 1.	Cell Cycle	C18H20N6OS
WZ4002	494.18	EGFR	13	26.3062	<1		WZ4002 is a novel, mutant-selective EGFR inhibitor for EGFR(L858R)/(T790M) with IC50 of 2 nM/8 nM in BaF3 cell line does not inhibit ERBB2 phosphorylation (T798I).	Protein Tyrosine Kinase	C25H27ClN6O3
PD98059	267.28	MEK	14	52.3795	<1		PD98059 is a non-ATP competitive MEK inhibitor with IC50 of 2 μM in a cell-free assay, specifically inhibits MEK-1-mediated activation of MAPK does not directly inhibit ERK1 or ERK2.	MAPK	C16H13NO3
Regorafenib (BAY 73-4506)	482.82	c-RET,VEGFR	97	200.903	<1		Regorafenib (BAY 73-4506) is a multi-target inhibitor for VEGFR1, VEGFR2, VEGFR3, PDGFRβ, Kit, RET and Raf-1 with IC50 of 13 nM/4.2 nM/46 nM, 22 nM, 7 nM, 1.5 nM and 2.5 nM in cell-free assays, respectively.	Protein Tyrosine Kinase	C21H15ClF4N4O3
WZ8040	481.01	EGFR	96	199.58	<1		WZ8040 is a novel mutant-selective irreversible EGFRT790M inhibitor, does not inhibit ERBB2 phosphorylation (T798I).	Protein Tyrosine Kinase	C24H25ClN6OS
ENMD-2076	375.47	Aurora Kinase,FLT3,VEGFR	105	279.65	1	2.66333	ENMD-2076 has selective activity against Aurora A and Flt3 with IC50 of 14 nM and 1.86 nM, 25-fold selective for Aurora A than over Aurora B and less potent to VEGFR2/KDR and VEGFR3, FGFR1 and FGFR2 and PDGFRα. Phase 2.	Angiogenesis	C21H25N7
CUDC-101	434.49	EGFR,HDAC,HER2	20	46.031	<1		CUDC-101 is a potent multi-targeted inhibitor against HDAC, EGFR and HER2 with IC50 of 4.4 nM, 2.4 nM, and 15.7 nM, and inhibits class I/II HDACs, but not class III, Sir-type HDACs. Phase 1.	Epigenetics	C24H26N4O4
Tivozanib (AV-951)	454.86	c-Kit,PDGFR,VEGFR	20	43.9696	<1		Tivozanib (AV-951) is a potent and selective VEGFR inhibitor for VEGFR1/2/3 with IC50 of 30 nM/6.5 nM/15 nM, and also inhibits PDGFR and c-Kit, low activity observed against FGFR-1, Flt3, c-Met, EGFR and IGF-1R. Phase 3.	Protein Tyrosine Kinase	C22H19ClN4O5
YM201636	467.48	PI3K	35	74.8695	<1		YM201636 is a selective PIKfyve inhibitor with IC50 of 33 nM, less potent to p110α and insensitive to Fabl (yeast orthologue).	PI3K/Akt/mTOR	C25H21N7O3
OSI-930	443.44	c-Kit,CSF-1R,VEGFR	89	200.704	<1		OSI-930 is a potent inhibitor of Kit, KDR and CSF-1R with IC50 of 80 nM, 9 nM and 15 nM, respectively also potent to Flt-1, c-Raf and Lck and low activity against PDGFRα/β, Flt-3 and Abl. Phase 1.	Protein Tyrosine Kinase	C22H16F3N3O2S
KU-0063794	465.54	mTOR	16	34.3687	<1		KU-0063794 is a potent and highly specific dual-mTOR inhibitor of mTORC1 and mTORC2 with IC50 of ~10 nM in cell-free assays no effect on PI3Ks.	PI3K/Akt/mTOR	C25H31N5O4
Flavopiridol (Alvocidib)	401.84	CDK	15	37.3283	<1		Flavopiridol (Alvocidib) competes with ATP to inhibit CDKs including CDK1, CDK2, CDK4, CDK6, and CDK9 with IC50 values in the 20-100 nM range. It is more selective for CDK1, 2, 4, 6, 9 versus CDK7. Flavopiridol is initially found to inhibit EGFR and PKA. Phase 1/2.	Cell Cycle	C21H20ClNO5
AG-1024	305.17	IGF-1R	61	199.889	<1		AG-1024 (Tyrphostin) inhibits IGF-1R autophosphorylation with IC50 of 7 μM, is less potent to IR with IC50 of 57 μM and specifically distinguishes between InsR and IGF-1R (as compared to other tyrphostins).	Protein Tyrosine Kinase	C14H13BrN2O
Amuvatinib (MP-470)	447.51	c-Kit,FLT3,PDGFR	32	71.5068	<1		Amuvatinib (MP-470) is a potent and multi-targeted inhibitor of c-Kit, PDGFRα and Flt3 with IC50 of 10 nM, 40 nM and 81 nM, respectively. Phase 2.	Protein Tyrosine Kinase	C23H21N5O3S
Leflunomide	270.21	Dehydrogenase	54	199.845	<1		Leflunomide is a pyrimidine synthesis inhibitor belonging to the DMARD, used as an immunosuppressant agent.	Metabolism	C12H9F3N2O2
JNJ-7706621	394.36	Aurora Kinase,CDK	79	200.325	<1		JNJ-7706621 is pan-CDK inhibitor with the highest potency on CDK1/2 with IC50 of 9 nM/4 nM and showing >6-fold selectivity for CDK1/2 than CDK3/4/6 in cell-free assays. It also potently inhibits Aurora A/B and has no activity on Plk1 and Wee1.	Cell Cycle	C15H12F2N6O3S
CHIR-99021 (CT99021)	465.34	GSK-3	10	21.4897	<1		CHIR-99021 (CT99021) is a GSK-3α and GSK-3β inhibitor with IC50 of 10 nM and 6.7 nM, respectively. CHIR99201 does not exhibit cross-reactivity against cyclin-dependent kinases (CDKs) and shows a 350-fold selectivity toward GSK-3β compared to CDKs.	PI3K/Akt/mTOR	C22H18Cl2N8
PD173074	523.67	FGFR,VEGFR	100	190.96	<1		PD173074 is a potent FGFR1 inhibitor with IC50 of ~25 nM and also inhibits VEGFR2 with IC50 of 100-200 nM in cell-free assays, ~1000-fold selective for FGFR1 than PDGFR and c-Src.	Angiogenesis	C28H41N7O3
WYE-354	495.53	mTOR	99	199.786	<1		WYE-354 is a potent, specific and ATP-competitive inhibitor of mTOR with IC50 of 5 nM, blocks mTORC1/P-S6K(T389) and mTORC2/P-AKT(S473) not P-AKT(T308), selective for mTOR than PI3Kα (>100-fold) and PI3Kγ (>500-fold).	PI3K/Akt/mTOR	C24H29N7O5
Vemurafenib (PLX4032, RG7204)	489.92	Raf	97	197.992	<1		Vemurafenib (PLX4032, RG7204) is a novel and potent inhibitor of B-RafV600E with IC50 of 31 nM in cell-free assay. 10-fold selective for B-RafV600E over wild-type B-Raf in enzymatic assays and the cellular selectivity can exceed 100-fold.	MAPK	C23H18ClF2N3O3S
BX-795	591.47	IκB/IKK,PDK	100	169.07	<1		BX795 is a potent and specific PDK1 inhibitor with IC50 of 6 nM, 140- and 1600-fold more selective for PDK1 than PKA and PKC in cell-free assays, respectively. Meanwhile, in comparison to GSK3β more than 100-fold selectivity observed for PDK1.	PI3K/Akt/mTOR	C23H26IN7O2S
BX-912	471.35	PDK	94	199.427	<1		BX912 is a potent and specific PDK1 inhibitor with IC50 of 12 nM, 9- and 105- fold greater selectivity for PDK1 than PKA and PKC in cell-free assays, respectively. In comparison to GSK3β, selectivity for PDK1 is 600-fold.	PI3K/Akt/mTOR	C20H23BrN8O
Genistein	270.24	EGFR,Topoisomerase	54	199.822	<1		Genistein, a phytoestrogen found in soy products, is a highly specific inhibitor of protein tyrosine kinase (PTK) which blocks the mitogenic effect mediated by EGF on NIH-3T3 cells with IC50 of 12μM or by insulin with IC50 of 19 μM.	Protein Tyrosine Kinase	C15H10O5
TG100-115	346.34	PI3K	9	25.986	<1		TG100-115 is a PI3Kγ/δ inhibitor with IC50 of 83 nM/235 nM, with little effect on PI3Kα/β. Phase 1/2.	PI3K/Akt/mTOR	C18H14N6O2
Glesatinib?(MGCD265)	517.6	c-Met,Tie-2,VEGFR	104	200.927	<1		Glesatinib?(MGCD265) is a potent, multi-target and ATP-competitive inhibitor of c-Met and VEGFR1/2/3 with IC50 of 1 nM, 3 nM/3 nM/4 nM, respectively also inhibits Ron and Tie2. Phase 1/2.	Protein Tyrosine Kinase	C26H20FN5O2S2
Rigosertib (ON-01910)	473.47	PLK	95	200.646	95	200.646	Rigosertib (ON-01910) is a non-ATP-competitive inhibitor of PLK1 with IC50 of 9 nM in a cell-free assay. It shows 30-fold greater selectivity against Plk2 and no activity to Plk3. Phase 3.	Cell Cycle	C21H24NNaO8S
Ki8751	469.41	c-Kit,PDGFR,VEGFR	47	100.126	<1		Ki8751 is a potent and selective inhibitor of VEGFR2 with IC50 of 0.9 nM, >40-fold selective for VEGFR2 than c-Kit, PDGFRα and FGFR-2, little activity to EGFR, HGFR and InsR.	Protein Tyrosine Kinase	C24H18F3N3O4
Bafetinib (INNO-406)	576.62	Bcr-Abl	100	173.424	<1		Bafetinib (INNO-406) is a potent and selective dual Bcr-Abl/Lyn inhibitor with IC50 of 5.8 nM/19 nM in cell-free assays, does not inhibit the phosphorylation of the T315I mutant and is less potent to PDGFR and c-Kit. Phase 2.	Angiogenesis	C30H31F3N8O
Ruxolitinib (INCB018424)	306.37	JAK	61	199.106	<1		Ruxolitinib (INCB018424) is the first potent, selective, JAK1/2 inhibitor to enter the clinic with IC50 of 3.3 nM/2.8 nM in cell-free assays, >130-fold selectivity for JAK1/2 versus JAK3.	JAK/STAT	C17H18N6
Pelitinib (EKB-569)	467.92	EGFR	13	27.7825	<1		Pelitinib (EKB-569) is a potent irreversible EGFR inhibitor with IC50 of 38.5 nM. Phase2.	Protein Tyrosine Kinase	C24H23ClFN5O2
Aurora A Inhibitor I	588.07	Aurora Kinase	118	200.656	<1		Aurora A Inhibitor I is a novel, potent, and selective inhibitor of Aurora A with IC50 of 3.4 nM in a cell-free assay. It is 1000-fold more selective for Aurora A than Aurora B.	Cell Cycle	C31H31ClFN7O2
PHA-680632	501.62	Aurora Kinase	100	199.354	<1		PHA-680632 is potent inhibitor of Aurora A, Aurora B and Aurora C with IC50 of 27 nM, 135 nM and 120 nM, respectively. It has 10- to 200-fold higher IC50 for FGFR1, FLT3, LCK, PLK1, STLK2, and VEGFR2/3.	Cell Cycle	C28H35N7O2
VX-745	436.26	p38 MAPK	15	34.3832	<1		VX-745 is a potent and selective inhibitor of p38α with IC50 of 10 nM, 22-fold greater selectivity versus p38β and no inhibition to p38γ.	MAPK	C19H9Cl2F2N3OS
Thiazovivin	311.36	ROCK	15	48.1757	<1		Thiazovivin is a novel ROCK inhibitor with IC50 of 0.5 μM in a cell-free assay, promotes hESC survival after single-cell dissociation.	Cell Cycle	C15H13N5OS
SP600125	220.23	JNK	44	199.791	<1		SP600125 is a broad-spectrum JNK inhibitor for JNK1, JNK2 and JNK3 with IC50 of 40 nM, 40 nM and 90 nM in cell-free assays, respectively 10-fold greater selectivity against MKK4, 25-fold greater selectivity against MKK3, MKK6, PKB, and PKCα, and 100-fold selectivity against ERK2, p38, Chk1, EGFR etc.	MAPK	C14H8N2O
AZD6482	408.45	PI3K	82	200.759	<1		AZD6482 is a PI3Kβ inhibitor with IC50 of 10 nM, 8-, 87- and 109-fold more selective to PI3Kβ than PI3Kδ, PI3Kα and PI3Kγ in cell-free assays. Phase 1.	PI3K/Akt/mTOR	C22H24N4O4
Orantinib (TSU-68, SU6668)	310.35	PDGFR	62	199.774	<1		Orantinib (TSU-68, SU6668) has greatest potency against PDGFR autophosphorylation with Ki of 8 nM in a cell-free assay, but also strongly inhibits Flk-1 and FGFR1 trans-phosphorylation, little activity against IGF-1R, Met, Src, Lck, Zap70, Abl and CDK2 does not inhibit EGFR. Phase 3.	Protein Tyrosine Kinase	C18H18N2O3
GSK429286A	432.37	ROCK	87	201.217	<1		GSK429286A is a selective inhibitor of ROCK1 and ROCK2 with IC50 of 14 nM and 63 nM, respectively.	Cell Cycle	C21H16F4N4O2
Pimasertib (AS-703026)	431.2	MEK	86	199.443	<1		Pimasertib (AS-703026) is a highly selective, potent, ATP non-competitive allosteric inhibitor of MEK1/2 with IC50 of 5 nM-2 μM in MM cell lines. Phase 2.	MAPK	C15H15FIN3O3
SB525334	343.42	TGF-beta/Smad	68	198.008	<1		SB525334 is a potent and selective inhibitor of TGFβ receptor I (ALK5) with IC50 of 14.3 nM in a cell-free assay, 4-fold less potent to ALK4 than ALK5 and inactive to ALK2, 3, and 6.	TGF-beta/Smad	C21H21N5
HMN-214	424.47	PLK	12	28.2705	<1		HMN-214 is a prodrug of HMN-176, which alters the cellular spatial orientation of Plk1.	Cell Cycle	C22H20N2O5S
AEE788 (NVP-AEE788)	440.58	EGFR,HER2,VEGFR	88	199.737	<1		AEE788 (NVP-AEE788) is a potent inhibitor of EGFR and HER2/ErbB2 with IC50 of 2 nM and 6 nM, less potent to VEGFR2/KDR, c-Abl, c-Src, and Flt-1, does not inhibit Ins-R, IGF-1R, PKCα and CDK1. Phase 1/2.	Protein Tyrosine Kinase	C27H32N6
PHA-793887	361.48	CDK	72	199.181	<1		PHA-793887 is a novel and potent inhibitor of CDK2, CDK5 and CDK7 with IC50 of 8 nM, 5 nM and 10 nM. It is greater than 6-fold more selective for CDK2, 5, and 7 than CDK1, 4, and 9. Phase 1.	Cell Cycle	C19H31N5O2
PIK-93	389.88	PI3K	78	200.062	<1		PIK-93 is the first potent, synthetic PI4K (PI4KIIIβ) inhibitor with IC50 of 19 nM shown to inhibit PI3Kα with IC50 of 39 nM.	PI3K/Akt/mTOR	C14H16ClN3O4S2
Ponatinib (AP24534)	532.56	Bcr-Abl,FGFR,PDGFR,VEGFR	30	56.3317	<1		Ponatinib (AP24534) is a novel, potent multi-target inhibitor of Abl, PDGFRα, VEGFR2, FGFR1 and Src with IC50 of 0.37 nM, 1.1 nM, 1.5 nM, 2.2 nM and 5.4 nM in cell-free assays, respectively.	Angiogenesis	C29H27F3N6O
Voxtalisib (SAR245409, XL765) Analogue	599.66	mTOR,PI3K	12	20.0113	<1		Voxtalisib (SAR245409, XL765) Analogue is a dual inhibitor of mTOR/PI3K, mostly for p110γ with IC50 of 9 nM also inhibits DNA-PK and mTOR. Phase 1/2.	PI3K/Akt/mTOR	C31H29N5O6S
AT7519	382.24	CDK	10	26.1616	<1		AT7519 is a multi-CDK inhibitor for CDK1, 2, 4, 6 and 9 with IC50 of 10-210 nM. It is less potent to CDK3 and little active to CDK7. Phase 2.	Cell Cycle	C16H17Cl2N5O2
Adavosertib （MK-1775）	500.6	Wee1	80	159.808			MK-1775 is a potent and selective Wee1 inhibitor with IC50 of 5.2 nM in a cell-free assay hinders G2 DNA damage checkpoint. Phase 2.	Cell Cycle	C27H32N8O2
Quizartinib (AC220)	560.67	FLT3	33	58.8582	<1		Quizartinib (AC220) is a second-generation FLT3 inhibitor for Flt3(ITD/WT) with IC50 of 1.1 nM/4.2 nM in MV4-11 and RS411 cells, respectively, 10-fold more selective for Flt3 than KIT, PDGFRα, PDGFRβ, RET, and CSF-1R. Phase 3.	Angiogenesis	C29H32N6O4S
Hesperadin	516.65	Aurora Kinase	103	199.361	<1		Hesperadin potently inhibits Aurora B with IC50 of 250 nM in a cell-free assay. It markedly reduces the activity of AMPK, Lck, MKK1, MAPKAP-K1, CHK1 and PHK while it does not inhibit MKK1 activity in vivo.	Cell Cycle	C29H32N4O3S
BIX 02188	412.48	MEK	43	104.247	<1		BIX02188 is a selective inhibitor of MEK5 with IC50 of 4.3 nM, also inhibits ERK5 catalytic activity with IC50 of 810 nM, and does not inhibit closely related kinases MEK1, MEK2, ERK2, and JNK2.	MAPK	C26H26N4O2
BIX 02189	440.54	MEK	60	136.196	<1		BIX02189 is a selective inhibitor of MEK5 with IC50 of 1.5 nM, also inhibits ERK5 catalytic activity with IC50 of 59 nM in cell-free assays, and does not inhibit closely related kinases MEK1, MEK2, ERK2, and JNK2.	MAPK	C27H28N4O2
AZD7762	362.42	Chk	50	137.961	<1		AZD7762 is a potent and selective inhibitor of Chk1 with IC50 of 5 nM in a cell-free assay. It is equally potent against Chk2 and less potent against CAM, Yes, Fyn, Lyn, Hck and Lck. Phase 1.	Cell Cycle	C17H19FN4O2S
R406 (free base)	470.45	Syk	21	44.6381	<1		R406 (free base) is a potent Syk inhibitor with IC50 of 41 nM in a cell-free assay, strongly inhibits Syk but not Lyn, 5-fold less potent to Flt3. Phase 1.	Angiogenesis	C22H23FN6O5
CP-673451	417.5	PDGFR	28	67.0659	<1		CP-673451 is a selective inhibitor of PDGFRα/β with IC50 of 10 nM/1 nM in cell-free assays, exhibits >450-fold selectivity over other angiogenic receptors, has antiangiogenic and antitumor activity.	Protein Tyrosine Kinase	C24H27N5O2
AZD8055	465.54	mTOR	50	107.402	<1		AZD8055 is a novel ATP-competitive mTOR inhibitor with IC50 of 0.8 nM in MDA-MB-468 cells with excellent selectivity (?1,000-fold) against PI3K isoforms and ATM/DNA-PK. Phase 1.	PI3K/Akt/mTOR	C25H31N5O4
PHT-427	409.61	Akt,PDK	82	200.19	<1		PHT-427 is a dual Akt and PDPK1 inhibitor (high affinity binding for the PH domains of Akt and PDPK1) with Ki of 2.7 μM and 5.2 μM, respectively.	PI3K/Akt/mTOR	C20H31N3O2S2
KRN 633	416.86	VEGFR	9	21.59	<1		KRN 633 is an ATP-competitive inhibitor of VEGFR1/2/3 with IC50 of 170 nM/160 nM/125 nM, weakly inhibits PDGFR-α/β and c-Kit, does not block the phosphorylation of FGFR-1, EGFR or c-Met in cell.	Protein Tyrosine Kinase	C20H21ClN4O4
AT7867	337.85	Akt,S6 Kinase	68	201.273	<1		AT7867 is a potent ATP-competitive inhibitor of Akt1/2/3 and p70S6K/PKA with IC50 of 32 nM/17 nM/47 nM and 85 nM/20 nM in cell-free assays, respectively little activity outside the AGC kinase family.	PI3K/Akt/mTOR	C20H20ClN3
BMS-777607	512.89	TAM Receptor,c-Met	47	91.6376	<1		BMS-777607 is a Met-related inhibitor for c-Met, Axl, Ron and Tyro3 with IC50 of 3.9 nM, 1.1 nM, 1.8 nM and 4.3 nM in cell-free assays, 40-fold more selective for Met-related targets versus Lck, VEGFR-2, and TrkA/B, and more than 500-fold greater selectivity versus all other receptor and non receptor kinases. Phase 1/2.	Protein Tyrosine Kinase	C25H19ClF2N4O4
PD318088	561.09	MEK	112	199.611	<1		PD318088 is a non-ATP competitive allosteric MEK1/2 inhibitor, binds simultaneously with ATP in a region of the MEK1 active site that is adjacent to the ATP-binding site.	MAPK	C16H13BrF3IN2O4
KU-60019	547.67	ATM/ATR	18	32.8665	<1		KU-60019 is an improved analogue of KU-55933, with IC50 of 6.3 nM for ATM in cell-free assays, 270- and 1600-fold more selective for ATM than DNA-PK and ATR,and is a highly effective radiosensitizer.	DNA Damage	C30H33N3O5S
BS-181 HCl	416.99	CDK	83	199.046	3	7.19442	BS-181 HCl is a highly selective CDK7 inhibitor with IC50 of 21 nM. It is more than 40-fold selective for CDK7 than CDK1, 2, 4, 5, 6, or 9.	Cell Cycle	C22H33ClN6
Fasudil (HA-1077) HCl	327.83	Autophagy,ROCK	5	15.2518	65	198.273	Fasudil(HA-1077), a potent and selective inhibitor of Rho kinase, displays less potent inhibiton over PKA, PKG, PKC and MLCK with Ki of 1.6, 1.6, 3.3, and 36 μM in cell-free assays, respectively.	Cell Cycle	C14H18ClN3O2S
Doramapimod (BIRB 796)	527.66	p38 MAPK	100	189.516	<1		Doramapimod (BIRB 796) is a pan-p38 MAPK inhibitor with IC50 of 38 nM, 65 nM, 200 nM and 520 nM for p38α/β/γ/δ in cell-free assays, and binds p38α with Kd of 0.1 nM in THP-1 cells, 330-fold greater selectivity versus JNK2, weak inhibition for c-RAF, Fyn and Lck, insignificant inhibition of ERK-1, SYK, IKK2.	MAPK	C31H37N5O3
Tie2 kinase inhibitor	439.53	Tie-2	35	79.6305	<1		Tie2 kinase inhibitor is an optimized compound of SB-203580, selective to Tie2 with IC50 of 0.25 μM, 200-fold more potent than p38.	Protein Tyrosine Kinase	C26H21N3O2S
H 89 2HCl	519.28	PKA,S6 Kinase	104	200.277	6	11.5545	H 89 2HCl is a potent PKA inhibitor with Ki of 48 nM in a cell-free assay, 10-fold selective for PKA than PKG,500-fold greater selectivity than PKC, MLCK, calmodulin kinase II and casein kinase I/II.	PI3K/Akt/mTOR	C20H22BrCl2N3O2S
TWS119	318.33	GSK-3	64	201.049	<1		TWS119 is a GSK-3β inhibitor with IC50 of 30 nM in a cell-free assay capable of inducing neuronal differentiation and may be useful to stem cell biology.	PI3K/Akt/mTOR	C18H14N4O2
Mesalamine	153.14	IκB/IKK,Immunology & Inflammation related	31	202.429	<1		Mesalamine is a specific inhibitor of TNFα-induced IKK activity, used to treat inflammatory bowel disease.	NF-κB	C7H7NO3
Pitavastatin Calcium	880.98	HMG-CoA Reductase	51	57.8901	<1		Pitavastatin calcium, a novel member of the medication class of statins, is a calcium salt formulation of pitavastatin which is a highly effective HMG-CoA reductase inhibitor.	Metabolism	C50H46CaF2N2O8
PF-573228	491.49	FAK	26	52.9004	<1		PF-573228 is an ATP-competitive inhibitor of FAK with IC50 of 4 nM in a cell-free assay, ~50- to 250-fold selective for FAK than Pyk2, CDK1/7 and GSK-3β.	Angiogenesis	C22H20F3N5O3S
BMS-265246	345.34	CDK	20	57.9139	<1		BMS-265246 is a potent and selective CDK1/2 inhibitor with IC50 of 6 nM/9 nM in a cell-free assay. It is 25-fold more selective for CDK1/2 than CDK4.	Cell Cycle	C18H17F2N3O2
ENMD-2076 L-(+)-Tartaric acid	525.56	Aurora Kinase,FLT3,VEGFR	100	190.273	<1		ENMD-2076 L-(+)-Tartaric acid is the tartaric acid of ENMD-2076, selective activity against Aurora A and Flt3 with IC50 of 14 nM and 1.86 nM, 25-fold more selective for Aurora A than Aurora B and less potent to VEGFR2/KDR and VEGFR3, FGFR1 and FGFR2 and PDGFRα. Phase 2.	Angiogenesis	C25H31N7O6
Lapatinib	581.06	EGFR,HER2	100	172.099	<1		Lapatinib, used in the form of Lapatinib Ditosylate, is a potent EGFR and ErbB2 inhibitor with IC50 of 10.8 and 9.2 nM in cell-free assays, respectively.	Protein Tyrosine Kinase	C29H26ClFN4O4S
AZD8330	461.23	MEK	92	199.467	<1		AZD8330 is a novel, selective, non-ATP competitive MEK 1/2 inhibitor with IC50 of 7 nM. Phase 1.	MAPK	C16H17FIN3O4
KW-2449	332.4	Aurora Kinase,Bcr-Abl,FLT3	67	201.564	<1		KW-2449 is a multiple-targeted inhibitor, mostly for Flt3 with IC50 of 6.6 nM, modestly potent to FGFR1, Bcr-Abl and Aurora A little effect on PDGFRβ, IGF-1R, EGFR. Phase 1.	Angiogenesis	C20H20N4O
RAF265 (CHIR-265)	518.41	Raf,VEGFR	100	192.898	<1		RAF265 (CHIR-265) is a potent selective inhibitor of C-Raf/B-Raf/B-Raf V600E with IC50 of 3-60 nM, and exhibits potent inhibition on VEGFR2 phosphorylation with EC50 of 30 nM in cell-free assays. Phase 2.	MAPK	C24H16F6N6O
PF-4708671	390.41	S6 Kinase	30	76.8423	<1		PF-4708671 is a cell-permeable inhibitor of p70 ribosomal S6 kinase (S6K1 isoform) with Ki/IC50 of 20 nM/160 nM in cell-free assays, 400-fold greater selectivity for S6K1 than S6K2, and 4- and >20-fold selectivity for S6K1 than MSK1 and RSK1/2, respectively. First S6K1-specific inhibitor to be reported.	PI3K/Akt/mTOR	C19H21F3N6
Gandotinib (LY2784544)	469.94	JAK	94	200.026	<1		Gandotinib (LY2784544) is a potent JAK2 inhibitor with IC50 of 3 nM, effective in JAK2V617F, 8- and 20-fold selective versus JAK1 and JAK3. Phase 2.	JAK/STAT	C23H25ClFN7O
AST-1306	621.08	EGFR	124	199.652	<1		AST-1306 is a novel irreversible inhibitor of EGFR and ErbB2 with IC50 of 0.5 nM and 3 nM, also effective in mutation EGFR T790M/L858R, more potent to ErbB2-overexpressing cells, 3000-fold selective for ErbB family than other kinases.	Protein Tyrosine Kinase	C31H26ClFN4O5S
SB505124	335.4	TGF-beta/Smad	67	199.761	<1		SB505124 is a selective inhibitor of TGFβR for ALK4, ALK5 with IC50 of 129 nM and 47 nM in cell-free assays, respectively, also inhibits ALK7, but does not inhibit ALK1, 2, 3, or 6.	TGF-beta/Smad	C20H21N3O2
Sapitinib (AZD8931)	473.93	EGFR,HER2	40	84.4006	<1		Sapitinib (AZD8931) is a reversible, ATP competitive inhibitor of EGFR, ErbB2 and ErbB3 with IC50 of 4 nM, 3 nM and 4 nM in cell-free assays, more potent than Gefitinib or Lapatinib against NSCLC cell, 100-fold more selective for the ErbB family than MNK1 and Flt. Phase 2.	Protein Tyrosine Kinase	C23H25ClFN5O3
GSK461364	543.6	PLK	10	18.3959	<1		GSK461364 inhibits purified Plk1 with Ki of 2.2 nM in a cell-free assay. It is more than 1000-fold selective against Plk2/3. Phase 1.	Cell Cycle	C27H28F3N5O2S
R406	628.63	FLT3,Syk	100	159.076	<1		R406 is a potent Syk inhibitor with IC50 of 41 nM in cell-free assays, strongly inhibits Syk but not Lyn, 5-fold less potent to Flt3. Phase 1.	Angiogenesis	C28H29FN6O8S
SGI-1776 free base	405.42	Pim	81	199.793	<1		SGI-1776 free base is a novel ATP competitive inhibitor of Pim1 with IC50 of 7 nM in a cell-free assay, 50- and 10-fold selective versus Pim2 and Pim3, also potent to Flt3 and haspin. Phase 1.	JAK/STAT	C20H22F3N5O
BMS-794833	468.84	c-Met,VEGFR	94	200.495	<1		BMS-794833 is a potent ATP competitive inhibitor of Met/VEGFR2 with IC50 of 1.7 nM/15 nM, also inhibits Ron, Axl and Flt3 with IC50 of <3 nM a prodrug of BMS-817378. Phase 1.	Protein Tyrosine Kinase	C23H15ClF2N4O3
NVP-BHG712	503.48	Bcr-Abl,Ephrin receptor,Raf,Src	101	200.604	<1		NVP-BHG712 is a specific EphB4 inhibitor with ED50 of 25 nM that discriminates between VEGFR and EphB4 inhibition also shows activity against c-Raf, c-Src and c-Abl with IC50 of 0.395 μM, 1.266 μM and 1.667 μM, respectively.	Protein Tyrosine Kinase	C26H20F3N7O
OSI-420	415.87	EGFR	83	199.582	<1		OSI-420 is the active metabolite of Erlotinib (EGFR inhibitor with IC50 of 2 nM).	Protein Tyrosine Kinase	C21H22ClN3O4
PIK-293	397.43	PI3K	80	201.293	<1		PIK-293 is a PI3K inhibitor, mostly for PI3Kδ with IC50 of 0.24 μM, 500-, 100- and 50-fold less potent to PI3Kα/β/γ, respectively.	PI3K/Akt/mTOR	C22H19N7O
AZ 960	354.36	JAK	71	200.361	<1		AZ 960 is a novel ATP competitive JAK2 inhibitor with IC50 and Ki of <3 nM and 0.45 nM, 3-fold selectivity of AZ960 for JAK2 over JAK3.	JAK/STAT	C18H16F2N6
Mubritinib (TAK 165)	468.47	HER2	13	27.7499	<1		Mubritinib (TAK-165) is a potent inhibitor of HER2/ErbB2 with IC50 of 6 nM in BT-474 cell no activity to EGFR, FGFR, PDGFR, JAK1, Src and Blk in BT-474 cell line. Phase 1.	Protein Tyrosine Kinase	C25H23F3N4O2
Torkinib (PP242)	308.34	Autophagy,mTOR	61	197.834	<1		Torkinib (PP242) is a selective mTOR inhibitor with IC50 of 8 nM in cell-free assays targets both mTOR complexes with >10- and 100-fold selectivity for mTOR than PI3Kδ or PI3Kα/β/γ, respectively.	PI3K/Akt/mTOR	C16H16N6O
Momelotinib (CYT387)	414.46	JAK	74	178.546	<1		Momelotinib (CYT387) is an ATP-competitive inhibitor of JAK1/JAK2 with IC50 of 11 nM/18 nM, ~10-fold selectivity versus JAK3. Phase 3.	JAK/STAT	C23H22N6O2
SB590885	453.54	Raf	5	11.0244	<1		SB590885 is a potent B-Raf inhibitor with Ki of 0.16 nM in a cell-free assay, 11-fold greater selectivity for B-Raf over c-Raf, no inhibition to other human kinases.	MAPK	C27H27N5O2
Apatinib?mesylate	493.58	VEGFR	22	44.5723	<1		Apatinib is an orally bioavailable, selective VEGFR2 inhibitor with IC50 of 1 nM.	Protein Tyrosine Kinase	C25H27N5O4S
Idelalisib (CAL-101, GS-1101)	415.42	PI3K	83	199.798	<1		Idelalisib (CAL-101, GS-1101) is a selective p110δ inhibitor with IC50 of 2.5 nM in cell-free assays shown to have 40- to 300-fold greater selectivity for p110δ than p110α/β/γ, and 400- to 4000-fold more selectivity to p110δ than C2β, hVPS34, DNA-PK and mTOR.	PI3K/Akt/mTOR	C22H18FN7O
PIK-294	489.53	PI3K	98	200.192	<1		PIK-294 is a highly selective p110δ inhibitor with IC50 of 10 nM, 1000-, 49- and 16-fold less potent to PI3Kα/β/γ, respectively.	PI3K/Akt/mTOR	C28H23N7O2
Telatinib	409.83	c-Kit,PDGFR,VEGFR	82	200.083	<1		Telatinib is a potent inhibitor of VEGFR2/3, c-Kit and PDGFRα with IC50 of 6 nM/4 nM, 1 nM and 15 nM, respectively. Phase 2.	Protein Tyrosine Kinase	C20H16ClN5O3
Volasertib (BI 6727)	618.81	PLK	20	32.3201	<1		Volasertib (BI 6727) is a highly potent Plk1 inhibitor with IC50 of 0.87 nM in a cell-free assay. It shows 6- and 65-fold greater selectivity against Plk2 and Plk3. Phase 3.	Cell Cycle	C34H50N8O3
Palomid 529 (P529)	406.43	mTOR	81	199.296	<1		Palomid 529 (P529) inhibits both the mTORC1 and mTORC2 complexes, reduces phosphorylation of pAktS473, pGSK3βS9, and pS6 but no effect observed on pMAPK or pAktT308. Phase 1.	PI3K/Akt/mTOR	C24H22O6
Degrasyn (WP1130)	384.27	Bcr-Abl,DUB	77	200.38	<1		Degrasyn (WP1130) is a selective deubiquitinase (DUB: USP5, UCH-L1, USP9x, USP14, and UCH37) inhibitor and also suppresses Bcr/Abl, also a JAK2 transducer (without affecting 20S proteasome) and activator of transcription (STAT).	Angiogenesis	C19H18BrN3O
Buparlisib (BKM120, NVP-BKM120)	410.39	PI3K	82	199.81	<1		Buparlisib (BKM120, NVP-BKM120) is a selective PI3K inhibitor of p110α/β/δ/γ with IC50 of 52 nM/166 nM/116 nM/262 nM in cell-free assays, respectively. Reduced potency against VPS34, mTOR, DNAPK, with little activity to PI4Kβ. Phase 2.	PI3K/Akt/mTOR	C18H21F3N6O2
Silmitasertib (CX-4945)	349.77	Casein Kinase	16	45.7443	<1		Silmitasertib (CX-4945) is a potent and selective inhibitor of CK2 (casein kinase 2) with IC50 of 1 nM in a cell-free assay, less potent to Flt3, Pim1 and CDK1 (inactive in cell-based assay). Phase 1/2.	Metabolism	C19H12ClN3O2
Apigenin	270.24	P450 (e.g. CYP17)	54	199.822	<1		Apigenin is a potent P450 inhibitor for CYP2C9 with Ki of 2 μM.	Metabolism	C15H10O5
Formononetin	268.26	Others	54	201.297	<1		Formononetin is a phytoestrogen from the root of Astragalus membranaceus and an O-methylated isoflavone.	Others	C16H12O4
Honokiol	266.334	Akt,MEK	53	198.998	<1		Honokiol is the active principle of magnolia extract that inhibits Akt-phosphorylation and promotes ERK1/2 phosphorylation. Phase 3.	PI3K/Akt/mTOR	C18H18O2
Myricetin	318.24	MEK	63	197.964	<1		Myricetin, a natural flavonoid with antioxidant and anti tumor properties, is a novel inhibitor of MEK1 activity and transformation of JB6 P+ mouse epidermal cells. It also inhibits PI3Kγ with Kd of 0.17 μM.	MAPK	C15H10O8
Solanesol (Nonaisoprenol)	631.07	FAK	100	158.461			Solanesol is a long-chain polyisoprenoid alcohol compound with inhibitory activities toward FAK. It mainly accumulates in solanaceous crops, including tobacco, tomato, potato, eggplant, and pepper plants.	Angiogenesis	C45H74O
Taxifolin (Dihydroquercetin)	304.25	VEGFR	60	197.206	<1		Taxifolin, type I inhibitor for VEGFR-2 kinase, is a flavonoid in many plants such as Taxus chinensis, Siberian larch, Cedrus deodara and so on.	Angiogenesis	C15H12O7
Biochanin A	284.26	FAAH	57	200.521	<1		Biochanin A, an O-methylated isoflavone from Trifolium pratense, inhibits protein tyrosine kinase (PTK) of epidermal growth factor receptor with IC50 values of 91.5 &muM.	Metabolism	C16H12O5
Indirubin	262.26	GSK-3	53	202.09	<1		Indirubin is a potent cyclin-dependent kinases and GSK-3β inhibitor with IC50 of about 5 μM and 0.6 μM.	PI3K/Akt/mTOR	C16H10N2O2
Quercetin	302.24	Src,Sirtuin,PKC,PI3K	61	201.826	<1		Quercetin, a natural flavonoid present in vegetables, fruit and wine, is a stimulator of recombinant SIRT1 and also a PI3K inhibitor with IC50 of 2.4-5.4 μM. Phase 4.	Epigenetics	C15H10O7
Chrysophanic Acid	254.24	EGFR,mTOR	5	19.6665	<1		Chrysophanic acid (Chrysophanol), a natural anthraquinone isolated from Dianella longifolia, is a EGFR/mTOR pathway inhibitor.	Protein Tyrosine Kinase	C15H10O4
Imatinib (STI571)	493.6	PDGFR	33	66.8558	<1		Imatinib (STI571) is a multi-target inhibitor of tyrosine kinase with inhibition for v-Abl, c-Kit and PDGFR, IC50 values are 0.6 μM, 0.1 μM and 0.1 μM in cell-free or cell-based assays, respectively.	Protein Tyrosine Kinase	C29H31N7O
Mitoxantrone 2HCl	517.4	Topoisomerase	89	172.014	89	172.014	Mitoxantrone is a type II topoisomerase inhibitor with IC50 of 2.0 μM, 0.42 mM for HepG2 and MCF-7/wt cells, respectively.	DNA Damage	C22H30Cl2N4O6
Daphnetin	178.14	PKA,EGFR,PKC	35	196.475	<1		Daphnetin, a natural coumarin derivative, is a protein kinase inhibitor, inhibits EGFR, PKA and PKC with IC50 of 7.67 μM, 9.33 μM and 25.01 μM, respectively, also known to exhibit anti-inflammatory and anti-oxidant activities.	Angiogenesis	C9H6O4
TAK-733	504.23	MEK	101	200.305	<1		TAK-733 is a potent and selective MEK allosteric site inhibitor for MEK1 with IC50 of 3.2 nM, inactive to Abl1, AKT3, c-RAF, CamK1, CDK2, c-Met, etc. Phase 1.	MAPK	C17H15F2IN4O4
AZD5438	371.46	CDK	74	199.214	<1		AZD5438 is a potent inhibitor of CDK1/2/9 with IC50 of 16 nM/6 nM/20 nM in cell-free assays. It is less potent to CDK5/6 and also inhibits GSK3β. Phase 1.	Cell Cycle	C18H21N5O2S
PP121	319.36	DNA-PK,mTOR,PDGFR,Src,VEGFR,Bcr-Abl	64	200.401	<1		PP-121 is a multi-targeted inhibitor of PDGFR, Hck, mTOR, VEGFR2, Src and Abl with IC50 of 2 nM, 8 nM, 10 nM, 12 nM, 14 nM and 18 nM, also inhibits DNA-PK with IC50 of 60 nM.	Protein Tyrosine Kinase	C17H17N7
OSI-027	406.44	mTOR	18	44.287	<1		OSI-027 is a selective and potent dual inhibitor of mTORC1 and mTORC2 with IC50 of 22 nM and 65 nM in cell-free assays, and more than 100-fold selectivity observed for mTOR than PI3Kα, PI3Kβ, PI3Kγ or DNA-PK. Phase 1.	PI3K/Akt/mTOR	C21H22N6O3
Fostamatinib (R788)	580.46	Syk	116	199.842	<1		Fostamatinib (R788), a prodrug of the active metabolite R406, is a Syk inhibitor with IC50 of 41 nM, strongly inhibits Syk but not Lyn, 5-fold less potent to Flt3. Phase 3.	Angiogenesis	C23H26FN6O9P
Rabusertib (LY2603618)	436.3	Chk	13	29.796	<1		Rabusertib (LY2603618) is a highly selective Chk1 inhibitor with potential anti-tumor activity in a cell-free assay. IC50=7 nM, showing approximately 100-fold more potent against Chk1 than against any of the other protein kinases evaluated.	Cell Cycle	C18H22BrN5O3
Rebastinib (DCC-2036)	553.59	Bcr-Abl	111	200.509	<1		Rebastinib (DCC-2036) is a conformational control Bcr-Abl inhibitor for Abl1(WT) and Abl1(T315I) with IC50 of 0.8 nM and 4 nM, also inhibits SRC, LYN, FGR, HCK, KDR, FLT3, and Tie-2, and low activity to seen towards c-Kit. Phase 1.	Angiogenesis	C30H28FN7O3
CCT128930	341.84	Akt	68	198.923	<1		CCT128930 is a potent, ATP-competitive and selective inhibitor of Akt2 with IC50 of 6 nM in a cell-free assay, 28-fold greater selectivity for Akt2 than the closely related PKA kinase.	PI3K/Akt/mTOR	C18H20ClN5
A66	393.53	PI3K	79	200.747	<1		A66 is a potent and specific p110α inhibitor with IC50 of 32 nM in a cell-free assay, >100 fold selectivity for p110α over other class-I PI3K isoforms.	PI3K/Akt/mTOR	C17H23N5O2S2
Omipalisib (GSK2126458, GSK458)	505.5	mTOR,PI3K	100	197.824	<1		Omipalisib (GSK2126458, GSK458) is a highly selective and potent inhibitor of p110α/β/δ/γ, mTORC1/2 with Ki of 0.019 nM/0.13 nM/0.024 nM/0.06 nM and 0.18 nM/0.3 nM in cell-free assays, respectively. Phase 1.	PI3K/Akt/mTOR	C25H17F2N5O3S
WYE-125132 (WYE-132)	519.6	mTOR	104	200.154	<1		WYE-125132 (WYE-132) is a highly potent, ATP-competitive mTOR inhibitor with IC50 of 0.19 nM highly selective for mTOR versus PI3Ks or PI3K-related kinases hSMG1 and ATR.	PI3K/Akt/mTOR	C27H33N7O4
A-674563	358.44	Akt,CDK,PKA	72	200.87	72	200.87	A-674563 is an Akt1 inhibitor with Ki of 11 nM in cell-free assays, modest potent to PKA and >30-fold selective for Akt1 over PKC.	PI3K/Akt/mTOR	C22H22N4O
AS-252424	305.28	PI3K	61	199.817	<1		AS-252424 is a novel, potent PI3Kγ inhibitor with IC50 of 30 nM in a cell-free assay with 30-fold selectivity for PI3Kγ than PI3Kα, and low inhibitory activity towards PI3Kδ/β.	PI3K/Akt/mTOR	C14H8FNO4S
PF-00562271 Besylate	665.66	FAK	14	21.0318	<1		PF-00562271 is the benzenesulfonate salt of PF-562271, which is a potent, ATP-competitive, reversible inhibitor of FAK with IC50 of 1.5 nM, ~10-fold less potent for Pyk2 than FAK and >100-fold selectivity against other protein kinases, except for some CDKs. Phase 1.	Angiogenesis	C27H26F3N7O6S2
Trametinib (GSK1120212)	615.39	MEK	22	35.7497	<1		Trametinib (GSK1120212) is a highly specific and potent MEK1/2 inhibitor with IC50 of 0.92 nM/1.8 nM in cell-free assays, no inhibition of the kinase activities of c-Raf, B-Raf, ERK1/2.	MAPK	C26H23FIN5O4
Flavopiridol HCl	438.3	CDK	88	200.776	<1		Flavopiridol HCl competes with ATP to inhibit CDKs including CDK1, CDK2, CDK4 and CDK6 with IC50 of ~ 40 nM in cell-free assays. It is 7.5-fold more selective for CDK1/2/4/6 than CDK7. Flavopiridol is initially found to inhibit EGFR and PKA. Phase 1/2.	Cell Cycle	C21H21Cl2NO5
Ibrutinib (PCI-32765)	440.5	BTK	88	199.773	<1		Ibrutinib (PCI-32765) is a potent and highly selective Brutons tyrosine kinase (Btk) inhibitor with IC50 of 0.5 nM in cell-free assays, modestly potent to Bmx, CSK, FGR, BRK, HCK, less potent to EGFR, Yes, ErbB2, JAK3, etc.	Angiogenesis	C25H24N6O2
AS-604850	285.22	PI3K	57	199.846	<1		AS-604850 is a selective, ATP-competitive PI3Kγ inhibitor with IC50 of 250 nM, over 80-fold selectivity for PI3Kγ than PI3Kδ/β, and 18-fold more selective for PI3Kγ than PI3Kα.	PI3K/Akt/mTOR	C11H5F2NO4S
CAY10505	289.28	PI3K	58	200.498	<1		CAY10505 is dehydroxyl of AS-252424, which is a PI3Kγ inhibitor with IC50 of 33 nM.	PI3K/Akt/mTOR	C14H8FNO3S
CHIR-124	419.91	Chk	7	16.6702	<1		CHIR-124 is a novel and potent Chk1 inhibitor with IC50 of 0.3 nM in a cell-free assay. It shows 2,000-fold selectivity against Chk2, 500- to 5,000-fold less activity against CDK2/4 and Cdc2.	Cell Cycle	C23H22ClN5O
NVP-BSK805 2HCl	563.47	JAK	113	200.543	3	5.32415	NVP-BSK805 2HCl is a potent and selective ATP-competitive JAK2 inhibitor with IC50 of 0.5 nM,>20-fold selectivity towards JAK1, JAK3 and TYK2.	JAK/STAT	C27H30Cl2F2N6O
R547	441.45	CDK	60	135.916	<1		R547 is a potent ATP-competitive inhibitor of CDK1/2/4 with Ki of 2 nM/3 nM/1 nM. It is less potent to CDK7 and GSK3α/β, while inactive to other kinases. Phase 1.	Cell Cycle	C18H21F2N5O4S
WAY-600	494.59	mTOR	22	44.4813	<1		WAY-600 is a potent, ATP-competitive and selective inhibitor of mTOR with IC50 of 9 nM blocks mTORC1/P-S6K(T389) and mTORC2/P-AKT(S473) but not P-AKT(T308) selective for mTOR than PI3Kα (>100-fold) and PI3Kγ (>500-fold).	PI3K/Akt/mTOR	C28H30N8O
TG101209	509.67	c-RET,FLT3,JAK	102	200.129	<1		TG101209 is a selective JAK2 inhibitor with IC50 of 6 nM, less potent to Flt3 and RET with IC50 of 25 nM and 17 nM in cell-free assays, ~30-fold selective for JAK2 than JAK3, sensitive to JAK2V617F and MPLW515L/K mutations.	JAK/STAT	C26H35N7O2S
Apitolisib (GDC-0980, RG7422)	498.6	mTOR,PI3K	20	40.1123	<1		Apitolisib (GDC-0980, RG7422) is a potent, class I PI3K inhibitor for PI3Kα/β/δ/γ with IC50 of 5 nM/27 nM/7 nM/14 nM in cell-free assays, respectively. Also a mTOR inhibitor with Ki of 17 nM in a cell-free assay, and highly selective versus other PIKK family kinases. Phase 2.	PI3K/Akt/mTOR	C23H30N8O3S
CH5132799	377.42	PI3K	12	31.7948	<1		CH5132799 inhibits class I PI3Ks, particularly PI3Kα with IC50 of 14 nM less potent to PI3Kβδγ, while sensitive in PIK3CA mutations cell lines. Phase 1.	PI3K/Akt/mTOR	C15H19N7O3S
KX2-391	431.53	Src	86	199.291	<1		KX2-391, the first clinical Src inhibitor (peptidomimetic class) that targets the peptide substrate site of Src, with GI50 of 9-60 nM in cancer cell lines. Phase 2.	Angiogenesis	C26H29N3O3
GSK1838705A	532.57	ALK,IGF-1R	107	200.913	<1		GSK1838705A is a potent IGF-1R inhibitor with IC50 of 2.0 nM, modestly potent to IR and ALK with IC50 of 1.6 nM and 0.5 nM, respectively, and little activity to other protein kinases.	Protein Tyrosine Kinase	C27H29FN8O3
TAK-901	504.64	Aurora Kinase	101	200.143	<1		TAK-901 is a novel inhibitor of Aurora A/B with IC50 of 21 nM/15 nM. It is not a potent inhibitor of cellular JAK2, c-Src or Abl. Phase 1.	Cell Cycle	C28H32N4O3S
AMG-900	503.58	Aurora Kinase	100	198.578	<1		AMG 900 is a potent and highly selective pan-Aurora kinases inhibitor for Aurora A/B/C with IC50 of 5 nM/4 nM /1 nM. It is >10-fold selective for Aurora kinases than p38α, Tyk2, JNK2, Met and Tie2. Phase 1.	Cell Cycle	C28H21N7OS
ZM 336372	389.45	Raf	78	200.282	<1		ZM 336372 is a potent and selective c-Raf inhibitor with IC50 of 70 nM, 10-fold selectivity over B-RAF, no inhibition to PKA/B/C, AMPK, p70S6, etc.	MAPK	C23H23N3O3
PH-797804	477.3	p38 MAPK	96	201.131	<1		PH-797804 is a novel pyridinone inhibitor of p38α with IC50 of 26 nM in a cell-free assay 4-fold more selective versus p38β and does not inhibit JNK2. Phase 2.	MAPK	C22H19BrF2N2O3
Dacomitinib (PF299804, PF299)	469.94	EGFR	19	40.4307	<1		Dacomitinib (PF299804, PF299) is a potent, irreversible pan-ErbB inhibitor, mostly to EGFR with IC50 of 6 nM in a cell-free assay, effective against NSCLCs with EGFR or ERBB2 mutations (resistant to gefitinib) as well as those harboring the EGFR T790M mutation. Phase 2.	Protein Tyrosine Kinase	C24H25ClFN5O2
AG-1478 (Tyrphostin AG-1478)	315.75	EGFR	25	79.1766	<1		AG-1478 (Tyrphostin AG-1478) is a selective EGFR inhibitor with IC50 of 3 nM in cell-free assays, almost no activity on HER2-Neu, PDGFR, Trk, Bcr-Abl and InsR.	Protein Tyrosine Kinase	C16H14ClN3O2
SB415286	359.72	GSK-3	72	200.156	<1		SB415286 is a potent GSK3α inhibitor with IC50/Ki of 78 nM/31 nM with equally effective inhibition of GSK-3β.	PI3K/Akt/mTOR	C16H10ClN3O5
Crenolanib (CP-868596)	443.54	PDGFR	88	198.404	<1		Crenolanib (CP-868596) is a potent and selective inhibitor of PDGFRα/β with Kd of 2.1 nM/3.2 nM in CHO cells, also potently inhibits FLT3, sensitive to D842V mutation not V561D mutation, >100-fold more selective for PDGFR than c-Kit, VEGFR-2, TIE-2, FGFR-2, EGFR, erbB2, and Src.	Protein Tyrosine Kinase	C26H29N5O2
AZ 3146	452.55	Kinesin	28	61.8716	<1		AZ3146 is a selective Mps1 inhibitor with IC50 of ~35 nM, contributes to recruitment of CENP-E (kinesin-related motor protein), less potent to FAK, JNK1, JNK2, and Kit.	Cytoskeletal Signaling	C24H32N6O3
Fedratinib (SAR302503, TG101348)	524.68	JAK	100	190.592	<1		Fedratinib (SAR302503, TG101348) is a selective inhibitor of JAK2 with IC50 of 3 nM in cell-free assays, 35- and 334-fold more selective for JAK2 versus JAK1 and JAK3. Phase 2.	JAK/STAT	C27H36N6O3S
GSK1070916	507.63	Aurora Kinase	93	183.204	<1		GSK1070916 is a reversible and ATP-competitive inhibitor of Aurora B/C with IC50 of 3.5 nM/6.5 nM. It displays >100-fold selectivity against the closely related Aurora A-TPX2 complex. Phase 1.	Cell Cycle	C30H33N7O
PHA-767491	249.7	CDK	24	96.1153	<1		PHA-767491 is a potent ATP-competitive dual Cdc7/CDK9 inhibitor with IC50 of 10 nM and 34 nM in cell-free assays, respectively.It displays ~20-fold selectivity against CDK1/2 and GSK3-β, 50-fold selectivity against MK2 and CDK5, 100-fold selectivity against PLK1 and CHK2.	Cell Cycle	C12H11N3O.HCl
PF-04691502	425.48	Akt,mTOR,PI3K	14	32.904	<1		PF-04691502 is an ATP-competitive PI3K(α/β/δ/γ)/mTOR dual inhibitor with Ki of 1.8 nM/2.1 nM/1.6 nM/1.9 nM and 16 nM in cell-free assays, little activity against either Vps34, AKT, PDK1, p70S6K, MEK, ERK, p38, or JNK. Phase 2.	PI3K/Akt/mTOR	C22H27N5O4
CHIR-98014	486.31	GSK-3	8	16.4504	<1		CHIR-98014 is a potent GSK-3α/β inhibitor with IC50 of 0.65 nM/0.58 nM in cell-free assays, with the ability to distinguish GSK-3 from its closest homologs Cdc2 and ERK2.	PI3K/Akt/mTOR	C20H17Cl2N9O2
AZ 628	451.52	Raf	90	199.327	<1		AZ628 is a new pan-Raf inhibitor for BRAF, BRAFV600E, and c-Raf-1 with IC50 of 105 nM, 34 nM and 29 nM in cell-free assays, also inhibits VEGFR2, DDR2, Lyn, Flt1, FMS, etc.	MAPK	C27H25N5O2
AMG-458	539.58	c-Met	21	38.9192	<1		AMG 458 is a potent c-Met inhibitor with Ki of 1.2 nM, ~350-fold selectivity for c-Met than VEGFR2 in cells.	Protein Tyrosine Kinase	C30H29N5O5
BGT226 (NVP-BGT226)	650.6	mTOR,PI3K	30	46.1113	<1		BGT226 (NVP-BGT226) is a novel class I PI3K/mTOR inhibitor for PI3Kα/β/γ with IC50 of 4 nM/63 nM/38 nM. Phase 1/2.	PI3K/Akt/mTOR	C32H29F3N6O6
GW788388	425.48	TGF-beta/Smad	15	35.2543	<1		GW788388 is a potent and selective inhibitor of ALK5 with IC50 of 18 nM in a cell-free assay, also inhibits TGF-β type II receptor and activin type II receptor activities, but does not inhibit BMP type II receptor.	TGF-beta/Smad	C25H23N5O2
Milciclib (PHA-848125)	460.57	CDK	92	199.752	<1		Milciclib (PHA-848125) is a potent, ATP-competitive CDK inhibitor for CDK2 with IC50 of 45 nM. It is >3-fold more selective for CDK2 than CDK1, 2, 4, 5, and 7. Phase 2.	Cell Cycle	C25H32N8O
HER2-Inhibitor-1	569.63	EGFR,HER2	100	175.553	<1		HER2-Inhibitor-1 is an analog of ARRY-380. ARRY-380 is a potent and selective HER2 inhibitor with IC50 of 8 nM, equipotent against truncated p95-HER2, 500-fold more selective for HER2 versus EGFR.	Protein Tyrosine Kinase	C29H27N7O4S
Tivantinib (ARQ 197)	369.42	c-Met	73	197.607	<1		Tivantinib (ARQ 197) is the first non-ATP-competitive c-Met inhibitor with Ki of 0.355 μM in a cell-free assay, little activity to Ron, and no inhibition to EGFR, InsR, PDGFRα or FGFR1/4. Phase 3.	Protein Tyrosine Kinase	C23H19N3O2
Varlitinib	466.94	EGFR	6	12.8496	<1		Varlitinib is a selective and potent ErbB1(EGFR) and ErbB2(HER2) inhibitor with IC50 of 7 nM and 2 nM, respectively. Phase 2.	Protein Tyrosine Kinase	C22H19ClN6O2S
CUDC-907	508.55	HDAC,PI3K	102	200.57	<1		CUDC-907 is a dual PI3K and HDAC inhibitor for PI3Kα and HDAC1/2/3/10 with IC50 of 19 nM and 1.7 nM/5 nM/1.8 nM/2.8 nM, respectively. Phase 1.	Cytoskeletal Signaling	C23H24N8O4S
NVP-BVU972	340.38	c-Met	68	199.777	<1		NVP-BVU972 is a selective and potent Met inhibitor with IC50 of 14 nM.	Protein Tyrosine Kinase	C20H16N6
Alectinib (CH5424802)	482.62	ALK	6	12.4321	1	2.07202	Alectinib (CH5424802) is a potent <b>ALK</b> inhibitor with <b>IC50</b> of 1.9 nM in cell-free assays, sensitive to L1196M mutation and higher selectivity for ALK than PF-02341066, NVP-TAE684 and PHA-E429.	Protein Tyrosine Kinase	C30H34N4O2
3-Methyladenine (3-MA)	149.15	Autophagy,PI3K	3	20.114	10	67.0466	3-Methyladenine (3-MA) is a selective PI3K inhibitor for Vps34 and PI3Kγ with IC50 of 25 μM and 60 μM in HeLa cells blocks class I PI3K consistently, whereas suppression of class III PI3K is transient, and also blocks autophagosome formation.	PI3K/Akt/mTOR	C6H7N5
Dinaciclib (SCH727965)	396.49	CDK	26	65.5754	<1		Dinaciclib (SCH727965) is a novel and potent CDK inhibitor for CDK2, CDK5, CDK1 and CDK9 with IC50 of 1 nM, 1 nM, 3 nM and 4 nM in cell-free assays, respectively. It also blocks thymidine (dThd) DNA incorporation. Phase 3.	Cell Cycle	C21H28N6O2
Dovitinib (TKI-258) Dilactic Acid	572.59	c-Kit,FGFR,FLT3,PDGFR,VEGFR	90	157.181	70	122.252	Dovitinib Dilactic acid (TKI258 Dilactic acid) is the Dilactic acid of Dovitinib, which is a multitargeted RTK inhibitor, mostly for class III (FLT3/c-Kit) with IC50 of 1 nM/2 nM, also potent to class IV (FGFR1/3) and class V (VEGFR1-4) RTKs with IC50 of 8-13 nM, less potent to InsR, EGFR, c-Met, EphA2, Tie2, IGFR1 and HER2. Phase 4.	Angiogenesis	C27H33FN6O7
MK-5108 (VX-689)	461.94	Aurora Kinase	92	199.16	<1		MK-5108 (VX-689) is a highly selective Aurora A inhibitor with IC50 of 0.064 nM in a cell-free assay and is 220- and 190-fold more selective for Aurora A than Aurora B/C, while it inhibits TrkA with less than 100-fold selectivity. Phase 1.	Cell Cycle	C22H21ClFN3O3S
MK-2461	495.55	c-Met,FGFR,PDGFR	99	199.778	<1		MK-2461 is a potent, multi-targeted inhibitor for c-Met(WT/mutants) with IC50 of 0.4-2.5 nM, less potent to Ron, Flt1 8- to 30-fold greater selectivity of c-Met targets versus FGFR1, FGFR2, FGFR3, PDGFRβ, KDR, Flt3, Flt4, TrkA, and TrkB. Phase 1/2. .	Protein Tyrosine Kinase	C24H25N5O5S
Nocodazole	301.32	Autophagy,Microtubule Associated	7	23.2311	<1		Nocodazole is a rapidly-reversible inhibitor of microtubule polymerization, also inhibits Abl, Abl(E255K) and Abl(T315I) with IC50 of 0.21 μM, 0.53 μM and 0.64 μM in cell-free assays, respectively.	Cytoskeletal Signaling	C14H11N3O3S
Vistusertib (AZD2014)	462.54	mTOR	38	82.1551	<1		Vistusertib (AZD2014) is a novel mTOR inhibitor with IC50 of 2.8 nM in a cell-free assay highly selective against multiple PI3K isoforms (α/β/γ/δ). AZD2014 showed no or weak binding to the majority of kinases when tested at 1 μM.	PI3K/Akt/mTOR	C25H30N6O3
TAK-285	547.96	EGFR,HER2	110	200.745	<1		TAK-285 is a novel dual HER2 and EGFR(HER1) inhibitor with IC50 of 17 nM and 23 nM, >10-fold selectivity for HER1/2 than HER4, less potent to MEK1/5, c-Met, Aurora B, Lck, CSK etc. Phase 1.	Protein Tyrosine Kinase	C26H25ClF3N5O3
Tofacitinib (CP-690550,Tasocitinib)	312.37	JAK	62	198.483	<1		Tofacitinib (CP-690550,Tasocitinib) is a novel inhibitor of JAK3 with IC50 of 1 nM in cell-free assays, 20- to 100-fold less potent against JAK2 and JAK1.	JAK/STAT	C16H20N6O
Sotrastaurin	438.48	PKC	87	198.413	<1		Sotrastaurin is a potent and selective pan-PKC inhibitor, mostly for PKCθ with Ki of 0.22 nM in a cell-free assay inactive to PKCζ. Phase 2.	TGF-beta/Smad	C25H22N6O2
WP1066	356.22	JAK	71	199.315	<1		WP1066 is a novel inhibitor of JAK2 and STAT3 with IC50 of 2.30 μM and 2.43 μM in HEL cells shows activity to JAK2, STAT3, STAT5, and ERK1/2 not JAK1 and JAK3. Phase 1.	JAK/STAT	C17H14BrN3O
AZD4547	463.57	FGFR	92	198.46	<1		AZD4547 is a novel selective FGFR inhibitor targeting FGFR1/2/3 with IC50 of 0.2 nM/2.5 nM/1.8 nM in cell-free assays, weaker activity against FGFR4, VEGFR2(KDR), and little activity observed against IGFR, CDK2, and p38. Phase 2/3.	Angiogenesis	C26H33N5O3
CEP-33779	462.57	JAK	36	77.8261	<1		CEP33779 is a selective JAK2 inhibitor with IC50 of 1.8 nM, >40- and >800-fold versus JAK1 and TYK2.	JAK/STAT	C24H26N6O2S
Dabrafenib (GSK2118436)	519.56	Raf	30	57.7412	<1		Dabrafenib (GSK2118436) is a mutant BRAFV600 specific inhibitor with IC50 of 0.8 nM in cell-free assays, with 4- and 6-fold less potency against B-Raf(wt) and c-Raf, respectively.	MAPK	C23H20F3N5O2S2
Ipatasertib (GDC-0068)	458	Akt	92	200.873	<1		Ipatasertib (GDC-0068) is a highly selective pan-Akt inhibitor targeting Akt1/2/3 with IC50 of 5 nM/18 nM/8 nM in cell-free assays, 620-fold selectivity over PKA. Phase 2.	PI3K/Akt/mTOR	C24H32ClN5O2
Sapanisertib (INK 128, MLN0128)	309.33	mTOR	62	200.433	<1		Sapanisertib (INK 128, MLN0128) is a potent and selective mTOR inhibitor with IC50 of 1 nM in cell-free assays >200-fold less potent to class I PI3K isoforms, superior in blocking mTORC1/2 and sensitive to pro-invasion genes (vs Rapamycin). Phase 1.	PI3K/Akt/mTOR	C15H15N7O
Alpelisib (BYL719)	441.47	PI3K	88	199.334	<1		Alpelisib (BYL719) is a potent and selective PI3Kα inhibitor with IC50 of 5 nM in a cell-free assay, and minimal effect on PI3Kβ/γ/δ. Phase 2.	PI3K/Akt/mTOR	C19H22F3N5O2S
Tyrphostin AG 879	316.46	HER2	36	113.758	<1		Tyrphostin AG 879 potently inhibits HER2/ErbB2 with IC50 of 1 μM, 100- and 500-fold higher selective to ErbB2 than PDGFR and EGFR.	Protein Tyrosine Kinase	C18H24N2OS
Torin 2	432.4	ATM/ATR,mTOR	20	46.2535	<1		Torin 2 is a potent and selective mTOR inhibitor with IC50 of 0.25 nM in p53?/? MEFs cell line 800-fold greater selectivity for mTOR than PI3K and improved pharmacokinetic properties. Inhibition of ATM/ATR/DNA-PK with EC50 of 28 nM/35 nM/118 nM,in PC3 cell lines respectively.	PI3K/Akt/mTOR	C24H15F3N4O
TAE226 (NVP-TAE226)	468.94	FAK	94	200.452	<1		TAE226 (NVP-TAE226) is a potent FAK inhibitor with IC50 of 5.5 nM and modestly potent to Pyk2, ~10- to 100-fold less potent against InsR, IGF-1R, ALK, and c-Met.	Angiogenesis	C23H25ClN6O3
Tideglusib	334.39	GSK-3	8	23.9242	<1		Tideglusib is an irreversible, non ATP-competitive GSK-3β inhibitor with IC50 of 60 nM in a cell-free assay fails to inhibit kinases with a Cys homologous to Cys-199 located in the active site. Phase 2.	PI3K/Akt/mTOR	C19H14N2O2S
TPCA-1	279.29	IκB/IKK	56	200.508	<1		TPCA-1 is an inhibitor of IKK-2 with IC50 of 17.9 nM in a cell-free assay, inhibits NF-κB pathway, exhibits 22-fold selectivity over IKK-1.	NF-κB	C12H10FN3O2S
SAR131675	358.39	VEGFR	30	83.7077	<1		SAR131675 is a VEGFR3 inhibitor with IC50/Ki of 23 nM/12 nM in cell-free assays, about 50- and 10-fold more selective for VEGFR3 than VEGFR1/2, little activity against Akt1, CDKs, PLK1, EGFR, IGF-1R, c-Met, Flt2 etc.	Protein Tyrosine Kinase	C18H22N4O4
BI-D1870	391.42	S6 Kinase	78	199.274	<1		BI-D1870 is an ATP-competitive inhibitor of S6 ribosome for RSK1/2/3/4 with IC50 of 31 nM/24 nM/18 nM/15 nM in cell-free assays, respectively 10- to 100-fold selectivity for RSK than MST2, GSK-3β, MARK3, CK1 and Aurora B.	PI3K/Akt/mTOR	C19H23F2N5O2
Semaxanib (SU5416)	238.28	VEGFR	22	92.3284	<1		Semaxanib (SU5416) is a potent and selective VEGFR(Flk-1/KDR) inhibitor with IC50 of 1.23 μM, 20-fold more selective for VEGFR than PDGFRβ, lack of activity against EGFR, InsR and FGFR. Phase 3.	Protein Tyrosine Kinase	C15H14N2O
Baricitinib (LY3009104, INCB028050)	371.42	JAK	74	199.235	<1		Baricitinib (LY3009104, INCB028050) is a selective JAK1 and JAK2 inhibitor with IC50 of 5.9 nM and 5.7 nM in cell-free assays, ~70 and ~10-fold selective versus JAK3 and Tyk2, no inhibition to c-Met and Chk2. Phase 3.	JAK/STAT	C16H17N7O2S
Golvatinib (E7050)	633.69	c-Met,VEGFR	20	31.5612	<1		Golvatinib (E7050) is a dual c-Met and VEGFR-2 inhibitor with IC50 of 14 nM and 16 nM, does not inhibit bFGF-stimulated HUVEC growth (up to 1000 nM). Phase 1/2.	Protein Tyrosine Kinase	C33H37F2N7O4
IMD 0354	383.67	IκB/IKK	10	26.0641	<1		IMD-0354 is an IKKβ inhibitor and blocks IκBα phosphorylation in NF-κB pathway.	NF-κB	C15H8ClF6NO2
WHI-P154	376.2	EGFR,JAK	75	199.362	<1		WHI-P154 is a potent JAK3 inhibitor with IC50 of 1.8 μM, no activity against JAK1 or JAK2, also inhibits EGFR, Src, Abl, VEGFR and MAPK, prevents Stat3, but not Stat5 phosphorylation.	JAK/STAT	C16H14BrN3O3
GW5074	520.94	Raf	104	199.639	<1		GW5074 is a potent and selective c-Raf inhibitor with IC50 of 9 nM, no effect on the activities of JNK1/2/3, MEK1, MKK6/7, CDK1/2, c-Src, p38 MAP, VEGFR2 or c-Fms is noted.	MAPK	C15H8Br2INO2
IKK-16 (IKK Inhibitor VII)	483.63	IκB/IKK	97	200.567	<1		IKK-16 (IKK Inhibitor VII) is a selective IκB kinase (IKK) inhibitor for IKK-2, IKK complex and IKK-1 with IC50 of 40 nM, 70 nM and 200 nM in cell-free assays, respectively.	NF-κB	C28H29N5OS
PF-562271	507.49	FAK	100	197.048	<1		PF-562271 is a potent, ATP-competitive, reversible inhibitor of FAK with IC50 of 1.5 nM in cell-free assays, ~10-fold less potent for Pyk2 than FAK and >100-fold selectivity against other protein kinases, except for some CDKs.	Angiogenesis	C21H20F3N7O3S
GW441756	275.3	Trk receptor	25	90.81	<1		GW441756 is a potent, selective inhibitor of TrkA with IC50 of 2 nM, with very little activity to c-Raf1 and CDK2.	Protein Tyrosine Kinase	C17H13N3O
Tyrphostin 9	282.38	PDGFR,EGFR	56	198.314	<1		Tyrphostin 9 is firstly designed as an EGFR inhibitor with IC50 of 460 μM, but is also found to be more potent to PDGFR with IC50 of 0.5 μM.	Protein Tyrosine Kinase	C18H22N2O
ZM 323881 HCl	411.86	VEGFR	10	24.2801	<1		ZM 323881 is a potent and selective VEGFR2 inhibitor with IC50 of <2 nM, almost no activity on VEGFR1, PDGFRβ, FGFR1, EGFR and ErbB2.	Protein Tyrosine Kinase	C22H19ClFN3O2
ZM 306416	333.74	VEGFR	67	200.755	<1		ZM 306416 is a VEGFR (Flt and KDR) inhibitor for VEGFR1 with IC50 of 0.33 μM, but also found to inhibit EGFR with IC50 of <10 nM.	Protein Tyrosine Kinase	C16H13ClFN3O2
MLN0905	486.56	PLK	97	199.359	<1		MLN0905 is a potent inhibitor of PLK1 with IC50 of 2 nM.	Cell Cycle	C24H25F3N6S
GNF-2	374.32	Bcr-Abl	74	197.692	<1		GNF-2 is a highly selective non-ATP competitive inhibitor of Bcr-Abl, shows no activity to Flt3-ITD, Tel-PDGFR, TPR-MET and Tel-JAK1 transformed tumor cells.	Angiogenesis	C18H13F3N4O2
S-Ruxolitinib (INCB018424)	306.37	JAK	61	199.106	5	16.3201	S-Ruxolitinib is the chirality of INCB018424, which is the first potent, selective, JAK1/2 inhibitor to enter the clinic with IC50 of 3.3 nM/2.8 nM, >130-fold selectivity for JAK1/2 versus JAK3. Phase 3.	JAK/STAT	C17H18N6
PF-477736	419.48	Chk	6	14.3034	<1		PF-477736 is a selective, potent and ATP-competitive Chk1 inhibitor with Ki of 0.49 nM in a cell-free assay and also inhibits VEGFR2, Aurora-A, FGFR3, Flt3, Fms (CSF1R), Ret and Yes. It shows ~100-fold selectivity for Chk1 than Chk2. Phase 1.	Cell Cycle	C22H25N7O2
Go 6983	442.51	PKC	59	133.33	<1		Go 6983 is a pan-PKC inhibitor against for PKCα, PKCβ, PKCγ and PKCδ with IC50 of 7 nM, 7 nM, 6 nM and 10 nM, respectively less potent to PKCζ and inactive to PKCμ.	TGF-beta/Smad	C26H26N4O3
BAY 11-7082	207.25	E2 conjugating,IκB/IKK	41	197.829	<1		BAY 11-7082 is a NF-κB inhibitor, inhibits TNFα-induced IκBα phosphorylation with IC50 of 10 μM in tumor cells. Also inhibiting components of the ubiquitin system.	NF-κB	C10H9NO2S
Icotinib	391.42	EGFR	78	199.274	<1		Icotinib is a potent and specific EGFR inhibitor with IC50 of 5 nM, including the EGFR, EGFR(L858R), EGFR(L861Q), EGFR(T790M) and EGFR(T790M, L858R).	Protein Tyrosine Kinase	C22H21N3O4
Salubrinal	479.81	PERK	95	197.995	<1		Salubrinal is a selective inhibitor of eIF2α dephosphorylation and inhibits ER stress-mediated apoptosis with EC50 of ~15 μM in a cell-free assay.	Apoptosis	C21H17Cl3N4OS
CHIR-99021 (CT99021) HCl	501.8	GSK-3	93	185.333	<1		CHIR-99021 HCl (CT99021) is hydrochloride of CHIR-99021, which is a GSK-3α/β inhibitor with IC50 of 10 nM/6.7 nM CHIR-99021 shows greater than 500-fold selectivity for GSK-3 versus its closest homologs Cdc2 and ERK2.	PI3K/Akt/mTOR	C22H19Cl3N8
TDZD-8	222.26	GSK-3	44.5	200.216	<1		TDZD-8 is a non-ATP competitive GSK-3β inhibitor with IC50 of 2 μM minimal inhibitory effect observed on CDK1, casein kinase II, PKA and PKC.	PI3K/Akt/mTOR	C10H10N2O2S
TAK-715	399.51	p38 MAPK	80	200.245	<1		TAK-715 is a p38 MAPK inhibitor for p38α with IC50 of 7.1 nM, 28-fold more selective for p38α over p38β, no inhibition to p38γ/δ, JNK1, ERK1, IKKβ, MEKK1 or TAK1. Phase 2.	MAPK	C24H21N3OS
Pazopanib	437.52	c-Kit,PDGFR,VEGFR	87	198.848	<1		Pazopanib is a novel multi-target inhibitor of VEGFR1, VEGFR2, VEGFR3, PDGFR, FGFR, c-Kit and c-Fms with IC50 of 10 nM, 30 nM, 47 nM, 84 nM, 74 nM, 140 nM and 146 nM in cell-free assays, respectively.	Protein Tyrosine Kinase	C21H23N7O2S
Piceatannol	244.24	Syk	48	196.528	<1		Piceatannol, a natural stilbene, is a selective Syk inhibitor and ~10-fold selectivity versus Lyn.	Angiogenesis	C14H12O4
Schisandrin B (Sch B)	400.46	ATM/ATR,P-gp	80	199.77	<1		Schisandrin B is the most abundant dibenzocyclooctadiene lignan present in the traditional Chinese medicinal herb Schisandra chinensis (Turcz.) Baill. It is a kind of ATR and P-gp inhibitor with high safety.	PI3K/Akt/mTOR	C23H28O6
Berbamine (dihydrochloride)	681.65	Bcr-Abl	100	146.703	100	146.703	Berbamine (BBM) is a natural bisbenzylisoquinoline product isolated from traditional Chinese herbal medicine Berberis amurensis. It is a novel inhibitor of bcr/abl fusion gene with potent anti-leukemia activity and also an inhibitor of NF-κB.	Angiogenesis	C37H42Cl2N2O6
Rosmarinic acid	360.31	IκB/IKK	72	199.828	24	66.6093	Rosmarinic acid (RA) is a naturally occurring hydroxylated compound. It has the ability to block complement fixation, inhibit lipoxygenase and cyclooxygenase activity and inhibit the expression of CCL11 and CCR3 by suppressing the IKK-β activity in NF-κB activation signaling.	NF-κB	C18H16O8
Dehydrocostus Lactone	230.3	IκB/IKK	46	199.739	<1		Dehydrocostus lactone (DHE), a natural sesquiterpene lactone, inhibits IKKβ activity, IκBα phosphorylation and degradation, coactivators p300 recruitments and p50/p65 NF-κB nuclear translocation, and their DNA binding activity on COX-2 promoter. It has anti-inflammatory, anti-ulcer, immunomodulatory and anti-tumor properties.	NF-κB	C15H18O2
Amlexanox	298.29	Immunology & Inflammation related	59	197.794	<1		Amlexanox is an anti-inflammatory antiallergic immunomodulator and also an inhibitor of the protein kinases TBK1 and IKK-ε.	Immunology & Inflammation	C16H14N2O4
2-Methoxy-1,4-naphthoquinone	188.18	PKC	37	196.62	<1		2-Methoxy-1,4-naphthoquinone, isolated from the leaves of Impatiens glandulifera, specifically suppressed the expression of PKC βI, δ, and ζ in a concentration-dependent manner in Raji cells.	Cytoskeletal Signaling	C11H8O3
Norcantharidin	168.15	EGFR,c-Met	33	196.253			Norcantharidin is a synthetic anticancer compound which is a dual inhibitor for c-Met and EGFR in human colon cancers.	Protein Tyrosine Kinase	C8H8O4
Notoginsenoside R1	933.13	Others	100	107.166			Notoginsenoside R1 is the main ingredient with cardiovascular activity in Panax notoginseng. It inhibits TNF-α-induced PAI-1 overexpression via extracellular signal-related kinases (ERK1/2) and phosphatidylinositol 3-kinase (PI3K)/protein kinase B (PKB) signaling pathways.	Others	C47H80O18
Bakuchiol	256.38	Immunology & Inflammation related	The physical form of the compound is liquid, which can be dissolved in any proportion.				Bakuchiol is a meroterpene phenol abundant in seeds and leaves of the plant Psoralea corylifolia. It has anti-inflammatory and antimicrobial activities.	Immunology & Inflammation	C18H24O
Harmine hydrochloride	248.71	DYRK	21	84.4357			Harmine, a fluorescent harmala alkaloid belonging to the beta-carboline family of compounds, is a highly cell-permeant and competitive inhibitor of ATP binding to the kinase pocket of DYRK1A, with about 60-fold higher IC50 value for DYRK2. It can also inhibit monoamine oxidases (MAOs) and cdc-like kinases (CLKs).	Cell Cycle	C13H13ClN2O
Scopoletin	192.17	Immunology & Inflammation related	38	197.742			Scopoletin is the main bioactive constituent of flower buds from Magnolia fargesii with anti-inflammatory, hypouricemic, and antioxidant activities.	Immunology & Inflammation	C10H8O4
Cabozantinib malate (XL184)	635.59	TAM Receptor,VEGFR	100	157.334	<1		Cabozantinib malate (XL184) is the malate of Cabozantinib, a potent VEGFR2 inhibitor with IC50 of 0.035 nM and also inhibits c-Met, Ret, Kit, Flt-1/3/4, Tie2, and AXL with IC50 of 1.3 nM, 4 nM, 4.6 nM, 12 nM/11.3 nM/6 nM, 14.3 nM and 7 nM in cell-free assays, respectively.	Protein Tyrosine Kinase	C32H30FN3O10
Sennoside B	862.74	PDGFR	100	115.91	<1		Sennoside B, a kind of irritant laxative isolated from rhei rhizome, inhibits PDGF-stimulated cell proliferation.	Protein Tyrosine Kinase	C42H38O20
Trapidil	205.26	PDGFR	41	199.747	41	199.747	Trapidil is a PDGF antagonist that can inhibit the proliferation of the PDGF-producing glioma cells.	Protein Tyrosine Kinase	C10H15N5
Wogonin	284.26	CDK,Transferase	56	197.003	<1		Wogonin, a natural and biologically-active flavonoid found in plants, is an inhibitor of CDK9 and does not inhibit CDK2, CDK4 and CDK6 at doses that inhibit CDK9 activity Also inhibits N-acetyltransferase.	Cell Cycle	C16H12O5
JNK-IN-8	507.59	JNK	100	197.009	<1		JNK-IN-8 is the first irreversible JNK inhibitor for JNK1, JNK2 and JNK3 with IC50 of 4.7 nM, 18.7 nM and 1 nM, >10-fold selectivity against MNK2, Fms and no inhibition to c-Kit, Met, PDGFRβin A375 cell line.	MAPK	C29H29N7O2
SC-514	224.3	IκB/IKK	45	200.624	<1		SC-514 is an orally active, ATP-competitive IKK-2 inhibitor with IC50 of 3-12 μM, blocks NF-κB-dependent gene expression, does not inhibit other IKK isoforms or other serine-threonine and tyrosine kinases.	NF-κB	C9H8N2OS2
MNS (3,4-Methylenedioxy-β-nitrostyrene, MDBN)	193.16	Tyrosinase,p97,Syk,Src	39	201.905	<1		MNS is a tyrosine kinase inhibitor, inhibits Syk, Src, p97 with IC50 of 2.5 μM, 29.3 μM and 1.7 μM, respectively.	Ubiquitin	C9H7NO4
Tofacitinib (CP-690550) Citrate	504.49	JAK	100	198.22	<1		Tofacitinib citrate (CP-690550 citrate) is a novel inhibitor of JAK with IC50 of 1 nM, 20 nM and 112 nM against JAK3, JAK2, and JAK1, respectively.	JAK/STAT	C22H28N6O8
Dabrafenib Mesylate	615.67	Raf	100	162.425	<1		Dabrafenib Mesylate is the mesylate salt form of dabrafenib, an orally bioavailable inhibitor of B-raf (BRAF) protein with IC50s of 0.8 nM, 3.2 nM and 5 nM for B-Raf (V600E), B-Raf (WT) and C-Raf, respectively.	MAPK	C24H24F3N5O5S3
Regorafenib Monohydrate	500.83	VEGFR,PDGFR,c-Kit,c-RET,Raf	100	199.669			Regorafenib is a novel oral multikinase inhibitor with IC50 values of 13, 4.2, 46, 22, 7, 1.5, 2.5, 28, 19 nM for VEGFR1, murine VEGFR2, murine VEGFR3, PDGFR-β, KIT, RET, RAF-1, B-RAF and B-RAF(V600E) respectively.	Protein Tyrosine Kinase	C21H17ClF4N4O4
Osimertinib mesylate	595.71	EGFR	9	15.108	-1		Osimertinib mesylate is the mesylate form of osimertinib, which is an oral, third-generation <b>epidermal growth factor receptor (EGFR)</b> tyrosine kinase inhibitor (TKI) drug.	Protein Tyrosine Kinase	C29H37N7O5S
Gefitinib hydrochloride	483.36	EGFR	8	16.5508	1	2.06885	Gefitinib is an EGFR inhibitor with IC50s of 15.5 nM and 823.3 nM for WT EGFR and EGFR (858R/T790M), respectively.	Protein Tyrosine Kinase	C22H25Cl2FN4O3
Nilotinib hydrochloride	565.977	Bcr-Abl	100	176.686	-1	-1.76686	Nilotinib hydrochloride is the hydrochloride salt form of nilotinib, an orally bioavailable Bcr-Abl tyrosine kinase inhibitor with antineoplastic activity.	Angiogenesis	C28H23ClF3N7O
Nintedanib Ethanesulfonate Salt	649.76	VEGFR,FGFR,PDGFR	100	153.903	100	153.903	Nintedanib is a small molecule tyrosine-kinase inhibitor with IC50 of 34 nM/13 nM/13 nM, 69 nM/37 nM/108 nM and 59 nM/65 nM for VEGFR1/2/3, FGFR1/2/3 and PDGFRα/β, respectively.	Protein Tyrosine Kinase	C33H39N5O7S
lenvatinib Mesylate	522.959	VEGFR	39	74.5757	-1	-1.9122	Lenvatinib Mesylate is a synthetic, orally available inhibitor of VEGFR2 tyrosine kinase with potential antineoplastic activity.	Protein Tyrosine Kinase	C22H23ClN4O7S
Lapatinib ditosylate monohydrate	943.476	Others	100	105.991	-1	-1.05991	Lapatinib Ditosylate is the ditosylate salt of lapatinib, a synthetic, orally-active quinazoline with potential antineoplastic activity. Lapatinib reversibly blocks phosphorylation of the epidermal growth factor receptor (EGFR), ErbB2, and the Erk-1 and-2 and AKT kinases; it also inhibits cyclin D protein levels in human tumor cell lines and xenografts. EGFR and ErbB2 have been implicated in the …	Others	C43H44ClFN4O11S3
Cediranib Maleate	566.58	VEGFR	100	176.498	<1		Cediranib Maleate is the maleate salt of Cediranib, which is a potent inhibitor of VEGFR with IC50 of <1 nM and also inhibits Flt1/4 with IC50 of 5 nM/≤3 nM.	Protein Tyrosine Kinase	C29H31FN4O7
Ruxolitinib Phosphate	404.36	JAK	80	197.844	29	71.7183	Ruxolitinib Phosphate is the phosphate salt form of ruxolitinib, an orally bioavailable Janus-associated kinase (JAK) inhibitor with potential antineoplastic and immunomodulating activities.	JAK/STAT	C17H21N6O4P
Apatinib	397.47	VEGFR,c-RET	79	198.757	<1		Apatinib is a potent inhibitor of the VEGF signaling pathway with IC50 values of 1 nM and 13 nM for VEGFR-2 and Ret, respectively.	Protein Tyrosine Kinase	C24H23N5O
Dasatinib hydrochloride	524.47	Abl/Src	100	190.669	11	20.9736	Dasatinib hydrochloride is a potent and dual AblWT/Src inhibitor IC50 of 0.6 nM/0.8 nM respectively; also inhibits c-KitWT/c-KitD816V with IC50 of 79 nM/37 nM.	Kinase	C22H27Cl2N7O2S
TBB	434.708	Casein Kinase	86	197.834	-1	-2.30039	TBB (4,5,6,7-tetrabromobenzotriazole) is a selective cell-permeable CK2 inhibitor with IC50 values of 0.9 and 1.6 μM for rat liver and human recombinant CK2 respectively.	Metabolism	C6HBr4N3
SC66	276.33	Akt	55	199.037			SC66 is an allosteric inhibitor which displays a dual-inhibitory function toward AKT activity with IC50 values of 0.77, 2.85 and 0.47 μg/ml in HepG2, Huh7 and Hep3B cells after 72 h treatment, respectively.	PI3K/Akt/mTOR	C18H16N2O
NU2058	247.30	CDK	49	198.14	<1		NU2058 is an inhibitor of CDK2 with IC50 value of 17 μM in an isolated enzyme assay. It also potentiates melphalan (DMF 2.3), and monohydroxymelphalan (1.7), but not temozolomide or ionising radiation.	Cell Cycle	C12H17N5O
Y15	284.01	FAK	56	197.176	56	197.176	Y15 is a small-molecule FAK scaffolding inhibitor that directly inhibits FAK autophosphorylation in a dose- and time-dependent manner.	Angiogenesis	C6H14Cl4N4
5-Bromoindole	196.04	GSK-3	39	198.939			5-bromoindole is an important pharmaceutical chemical intermediate and a potential inhibitor of glycogen synthase kinase 3 (GSK-3).	Stem Cells & Wnt	C8H6BrN
Verbascoside	624.59	Immunology & Inflammation related	100	160.105	100	160.105	Verbascoside, a phenylpropanoid glycoside from lemon verbena, has several biological properties such as anti-inflammatory, antimicrobial, antitumor, and antioxidant.	Immunology & Inflammation	C29H36O15
Psoralidin	336.34	Estrogen/progestogen Receptor	67	199.203	<1		Psoralidin, a naturally occurring coumestan isolated from the fractions of organic solvents such as ethylacetate, hexane, or n-butanol of the seed extract of Psoralea corylifolia L., has a variety of biological activities such as anticancer, antioxidant, antibacterial, antidepressant, anti-inflammatory activities, and regulation of insulin signaling. It is an agonist for both estrogen receptor (E…	Endocrinology & Hormones	C20H16O5
7-Hydroxy-4-chromone	162.142	Src	32	197.358	-1	-6.16743	7-Hydroxychromone is a Src kinase inhibitor with an IC50 of <300 μM.	Cancer	C9H6O3
Fruquintinib	393.39	VEGFRs	6	15.252	<1		Fruquintinib is a highly potent and selective VEGFR 1/2/3 inhibitor.	VEGFR	C21H19N3O5
Abemaciclib	506.593	CDK	6	11.8438	<1		Abemaciclib is a cell cycle inhibitor selective for CDK4/6 with IC50 of 2 nM and 10 nM in cell-free assays, respectively.	Cell Cycle	C27H32F2N8
Baricitinib phosphate	469.41	JAK	94	200.251	-1		Baricitinib phosphate is a selective <b>JAK1</b> and <b>JAK2</b> inhibitor with IC50 of 5.9 nM and 5.7 nM, ~70 and ~10-fold selective versus JAK3 and Tyk2, no inhibition to c-Met and Chk2.	JAK/STAT	C16H20N7O6PS
CID 2011756	396.87	Serine/threonin kina	30	75.5915	1	2.51972	CID 2011756 is an inhibitor of <b>protein kinase D (PKD)</b> with IC50 values of 3.2, 0.6, and 0.7 μM for PKD1, PKD2, and PKD3, respectively.	Apoptosis	C22H21ClN2O3
Motesanib (AMG-706)	373.45	VEGFR	75	200.83	1	2.67773	Motesanib (AMG-706) is an orally bioavailable <b>receptor tyrosine kinase</b> inhibitor with IC50 values of 2 nM, 3 nM, 6 nM, 8 nM, 84 nM, 59 nM for VEGFR1, VEGFR2, VEGFR3, Kit, PDGFR and Ret, respectively.	Protein Tyrosine Kinase	C22H23N5O
acalisib (GS-9820)	401.4	PI3K	80	199.302	1	2.49128	acalisib (GS-9820) is a highly selective and potent <b>p110δ</b> inhibitor (IC50 = 14 nM) with 114- to 400-fold selectivity over the other class I PI3K enzymes and no activity against Class II and III PI3K family members or other PI3K-related proteins including mTOR and DNA-PK.	PI3K/Akt/mTOR	C21H16FN7O
JANEX-1	297.31	JAK	5	16.8175	<1		JANEX-1 is a small molecule inhibitor of <b>JAK3</b> that selectively inhibits JAK3 at an IC50 of 78 µM without altering the activity of JAK1 or JAK2, or any other protein tyrosine kinases (IC50 ≥ 350 µM).	JAK/STAT	C16H15N3O3
WHI-P97	455.1	JAK	8	17.5786	<1		WHI-P97 is a potent inhibitor of <b>JAK-3</b> with an estimated Ki value of 0.09 μM in modeling studies and a measured IC50 value of 2.5 μM in EGFR kinase inhibition assays.	JAK/STAT	C16H13Br2N3O3
Solcitinib	389.45	JAK	30	77.0317	<1		Solcitinib is an inhibitor of <b>JAK1</b> with an IC50 of 8-9 nM, and shows 11-, 55- and 23-fold selectivity over JAK2, JAK3 and TYK2, respectively.	JAK/STAT	C22H23N5O2
VX-702	404.3	p38 MAPK	81	200.346	<1		VX-702 is a highly selective inhibitor of p38α MAPK, 14-fold higher potency against the p38α versus p38β. Phase 2.	MAPK	C19H12F4N4O2
AP26113-analog (ALK-IN-1)	529.01	ALK,EGFR	45	85.0646	<1		AP26113-analog (ALK-IN-1) is an analog of AP26113 which is a potent and selective ALK inhibitor. It is also an inhibitor of EGFR.	Protein Tyrosine Kinase	C26H34ClN6O2P
AZD2932	447.49	PDGFR,VEGFR,FLT3,c-Kit	89	198.887	<1		AZD2932 is a potent and mutil-targeted protein tyrosine kinase inhibitor with IC50 of 8 nM, 4 nM, 7 nM, and 9 nM for VEGFR-2, PDGFRβ, Flt-3, and c-Kit, respectively.	Protein Tyrosine Kinase	C24H25N5O4
BAY-61-3606	463.32	Syk	14	30.2167	<1		BAY-61-3606 is a potent and selective inhibitor of Syk kinase (Ki = 7.5 nM).	Angiogenesis	C20H20Cl2N6O3
Binimetinib (MEK162, ARRY-162, ARRY-438162)	441.23	MEK	88	199.442	<1		Binimetinib (MEK162, ARRY-162, ARRY-438162) is a potent inhibitor of MEK1/2 with IC50 of 12 nM in a cell-free assay. Phase 3.	MAPK	C17H15BrF2N4O3
PP2	301.77	Src	60	198.827	<1		PP2, a Src family kinase inhibitor, potently inhibits Lck/Fyn with IC50 of 4 nM/5 nM in cell-free assays, ~100-fold less potent to EGFR, inactive for ZAP-70, JAK2 and PKA.	Angiogenesis	C15H16ClN5
Merestinib (LY2801653)	552.53	c-Met	100	180.986	<1		LY2801653 is a type-II ATP competitive, slow-off inhibitor of MET tyrosine kinase with a dissociation constant (Ki) of 2 nM, a pharmacodynamic residence time (Koff) of 0.00132 min(-1) and t1/2 of 525 min.	Protein Tyrosine Kinase	C30H22F2N6O3
VS-5584 (SB2343)	354.41	PI3K	71	200.333	<1		VS-5584 (SB2343) is a potent and selective dual PI3K/mTOR inhibitor for mTOR, PI3Kα/β/δ/γ with IC50 of 3.4 nM and 2.6-21 nM, respectively. Phase 1.	PI3K/Akt/mTOR	C17H22N8O
CZC24832	364.4	PI3K	5	13.7212	<1		CZC24832 is the first selective PI3Kγ inhibitor with IC50 of 27 nM, with 10-fold selectivity over PI3Kβ and >100-fold selectivity over PI3Kα and PI3Kδ.	PI3K/Akt/mTOR	C15H17FN6O2S
Duvelisib (IPI-145, INK1197)	416.86	PI3K	83	199.108	<1		Duvelisib (IPI-145, INK1197) is a novel and selective PI3K δ/γ inhibitor with Ki and IC50 of 23 pM/243 pM and 1 nM/50 nM in cell-free assays, highly selective for PI3K δ/γ than other protein kinases. Phase 3.	Angiogenesis	C22H17ClN6O
GSK2656157	416.45	PERK	32	76.84	<1		GSK2656157 is an ATP-competitive and highly selective inhibitor of PERK with IC50 of 0.9 nM in a cell-free assay, 500-fold greater against a panel of 300 kinases.	Apoptosis	C23H21FN6O
XL388	455.5	mTOR	23	50.494	<1		XL388 is a highly potent, selective, ATP-competitive inhibitor of mTOR with IC50 of 9.9 nM, 1000-fold selectivity over the closely related PI3K kinases.	PI3K/Akt/mTOR	C23H22FN3O4S
XL019	444.53	JAK	16	35.9931	<1		XL019 is a potent and selective JAK2 inhibitor with IC50 of 2.2 nM, exhibiting >50-fold selectivity over JAK1, JAK3 and TYK2. Phase 1.	JAK/STAT	C25H28N6O2
PD168393	369.22	EGFR	73	197.714	<1		PD168393 is an irreversible EGFR inhibitor with IC50 of 0.70 nM, irreversibly alkylate Cys-773 inactive against insulin, PDGFR, FGFR and PKC.	Protein Tyrosine Kinase	C17H13BrN4O
CX-6258 HCl	498.4	Pim	57	114.366	89	178.571	CX-6258 HCl is a potent, orally efficacious pan-Pim kinase inhibitor with IC50 of 5 nM, 25 nM and 16 nM for Pim1, Pim2, and Pim3, respectively.	JAK/STAT	C26H25Cl2N3O3
AZ20	412.51	ATM/ATR	83	201.207	<1		AZ20 is a novel potent and selective inhibitor of ATR kinase with IC50 of 5 nM in a cell-free assay, 8-fold selectivity over mTOR.	PI3K/Akt/mTOR	C21H24N4O3S
CGI1746	579.69	BTK	100	172.506	<1		CGI1746 is a potent and highly selective small-molecule inhibitor of the Btk with IC50 of 1.9 nM.	Angiogenesis	C34H37N5O4
LY2874455	444.31	FGFR,VEGFR	88	198.06	<1		LY2874455 is a pan-FGFR inhibitor with IC50 of 2.8 nM, 2.6 nM, 6.4 nM, and 6 nM for FGFR1, FGFR2, FGFR3, and FGFR4, respectively, and also inhibits VEGFR2 activity with IC50 of 7 nM. Phase 1.	Protein Tyrosine Kinase	C21H19Cl2N5O2
PP1	281.36	Src	4	14.2167	<1		PP1 is a potent and selective Src inhibitor for Lck/Fyn with IC50 of 5 nM/ 6 nM.	Angiogenesis	C16H19N5
LY2090314	512.53	GSK-3	100	195.111	<1		LY2090314 is a potent GSK-3 inhibitor for GSK-3α/β with IC50 of 1.5 nM/0.9 nM may improve the efficacy of platinum-based chemotherapy regimens. LY2090314 is highly selective towards GSK3 as demonstrated by its fold selectivity relative to a large panel of kinases.	PI3K/Akt/mTOR	C28H25FN6O3
MK-8745	431.91	Aurora Kinase	86	199.116	<1		MK-8745 is a potent and selective Aurora A inhibitor with IC50 of 0.6 nM, more than 450-fold selectivity for Aurora A over Aurora B.	Cell Cycle	C20H19ClFN5OS
Tepotinib (EMD 1214063)	492.57	c-Met	5	10.1508	<1		Tepotinib (EMD 1214063) is a potent and selective c-Met inhibitor with IC50 of 4 nM, >200-fold selective for c-Met than IRAK4, TrkA, Axl, IRAK1, and Mer. Phase 1.	Protein Tyrosine Kinase	C29H28N6O2
RN486	606.69	BTK	62	102.194	<1		RN486 is a potent and selective BTK inhibitor with IC50 of 4 nM.	Angiogenesis	C35H35FN6O3
Ceritinib (LDK378)	558.14	ALK	20	35.8333	<1		Ceritinib (LDK378) is potent inhibitor against ALK with IC50 of 0.2 nM in cell-free assays, shows 40- and 35-fold selectivity against IGF-1R and InsR, respectively. Phase 3.	Protein Tyrosine Kinase	C28H36ClN5O3S
GSK2334470	462.59	PDK	90	194.557	<1		GSK2334470 is a novel PDK1 inhibitor with IC50 of ~10 nM in a cell-free assay, with no activity at other close related AGC-kinases.	PI3K/Akt/mTOR	C25H34N8O
Zotarolimus(ABT-578)	966.21	mTOR	100	103.497	<1		Zotarolimus (ABT-578) is an analogue of rapamycin, and inhibits FKBP-12 binding with IC50 of 2.8 nM.	PI3K/Akt/mTOR	C52H79N5O12
IPA-3	350.45	PAK	70	199.743	<1		IPA-3 is a selective non-ATP competitive Pak1 inhibitor with IC50 of 2.5 μM in a cell-free assay, no inhibition to group II PAKs (PAKs 4-6).	Cytoskeletal Signaling	C20H14O2S2
PF-3758309	490.62	PAK	98	199.747	<1		PF-03758309 is a potent, ATP-competitive, pyrrolopyrazole inhibitor of PAK4 with IC50 of 1.3 nM.	Cytoskeletal Signaling	C25H30N8OS
VE-822	463.55	ATM/ATR	36	77.6615	<1		VE-822 is an ATR inhibitor with IC50 of 19 nM in HT29 cells.	PI3K/Akt/mTOR	C24H25N5O3S
Taselisib (GDC 0032)	460.53	PI3K	70	151.999	<1		Taselisib (GDC 0032) is a potent, next-generation β isoform-sparing PI3K inhibitor targeting PI3Kα/δ/γ with Ki of 0.29 nM/0.12 nM/0.97nM, >10 fold selective over PI3Kβ.	PI3K/Akt/mTOR	C24H28N8O2
AZD1208	379.48	Pim	75	197.639	<1		AZD1208 is a potent, and orally available Pim kinase inhibitor with IC50 of 0.4 nM, 5 nM, and 1.9 nM for Pim1, Pim2, and Pim3 in cell-free assays, respectively. Phase 1.	JAK/STAT	C21H21N3O2S
AZD3463	448.95	ALK,IGF-1R	24	53.4581	<1		AZD3463 is a novel orally bioavailable ALK inhibitor with Ki of 0.75 nM, which also inhibits IGF1R with equivalent potency.	Protein Tyrosine Kinase	C24H25ClN6O
NU6027	251.28	CDK	50	198.981	<1		NU6027 is a potent ATR/CDK inhibitor, inhibits CDK1/2, ATR and DNA-PK with Ki of 2.5 μM/1.3 μM, 0.4 μM and 2.2 μM, enter cells more readily than the 6-aminopurine-based inhibitors.	Cell Cycle	C11H17N5O2
Go6976	377.42	FLT3,JAK,PKC	18	47.6922	<1		Go6976 is a potent PKC inhibitor with IC50 of 7.9 nM, 2.3 nM, and 6.2 nM for PKC (Rat brain), PKCα, and PKCβ1, respectively. Also a potent inhibitor of JAK2 and Flt3.	TGF-beta/Smad	C24H18N4O
MLN2480	506.29	Raf	100	197.515	<1		MLN2480 is an oral, selective pan-Raf kinase inhibitor in chinical trials.	MAPK	C17H12Cl2F3N7O2S
TIC10 Analogue	386.49	Akt	11	28.4613	<1		TIC10 Analogue is an analogue of TIC10, which inactivates Akt and ERK to induce TRAIL through Foxo3a, possesses superior drug properties: delivery across the blood-brain barrier, superior stability and improved pharmacokinetics. Phase 1/2.	PI3K/Akt/mTOR	C24H26N4O
PYR-41	371.3	E1 Activating	74	199.3	<1		PYR-41 is the first cell-permeable inhibitor of ubiquitin-activating enzyme E1, with no activity at E2.	Ubiquitin	C17H13N3O7
CGK 733	555.84	ATM/ATR	100	179.908	<1		CGK 733 is a potent and selective inhibitor of ATM/ATR with IC50 of ~200 nM.	DNA Damage	C23H18Cl3FN4O3S
BMS-911543	432.52	JAK	36	83.2331	<1		BMS-911543 is a potent and selective inhibitor of JAK2 with IC50 of 1.1?nM, ~350-, 75- and 65-fold selective to JAK1, JAK3 and TYK2, respectively. Phase 1/2.	JAK/STAT	C23H28N8O
AZD1080	334.37	GSK-3	52	155.516	<1		AZD1080 is a selective, orally active, brain permeable GSK3 inhibitor, inhibits human GSK3α and GSK3β with Ki of 6.9 nM and 31 nM, respectively, shows >14-fold selectivity against CDK2, CDK5, CDK1 and Erk2.	PI3K/Akt/mTOR	C19H18N4O2
DMH1	380.44	TGF-beta/Smad	22	57.8278	<1		DMH1 is a selective BMP receptor inhibitor with IC50 of 107.9 nM for ALK2, exhibiting no inhibition on AMPK, ALK5, KDR (VEGFR-2) or PDGFR.	TGF-beta/Smad	C24H20N4O
LDN-212854	406.48	TGF-beta/Smad	81	199.272	<1		LDN-212854 is a potent and selective BMP receptor inhibitor with IC50 of 1.3 nM for ALK2, about 2-, 66-, 1641-, and 7135-fold selectivity over ALK1, ALK3, ALK4, and ALK5, respectively.	TGF-beta/Smad	C25H22N6
ML347	352.39	TGF-beta/Smad,ALK	10	28.3776	<1		ML347 is a selective BMP receptor inhibitor with IC50 of 32 nM for ALK2, >300-fold selectivity over ALK3. Also inhibits ALK1 activity with IC50 of 46 nM.	TGF-beta/Smad	C22H16N4O
abemaciclib (LY2835219)	602.7	CDK	83	137.714	100	165.92	abemaciclib (LY2835219) is a potent and selective inhibitor of CDK4 and CDK6 with IC50 of 2 nM and 10 nM in cell-free assays, respectively. Phase 3.	Cell Cycle	C28H36F2N8O3S
SSR128129E	346.31	FGFR	69	199.243	1	2.88759	SSR128129E is an orally-active and allosteric FGFR1 inhibitor with IC50 of 1.9 μM, while not affecting other related RTKs.	Angiogenesis	C18H15N2NaO4
RO5126766 (CH5126766)	471.46	Raf	94	199.381	<1		RO5126766 (CH5126766) is a dual RAF/MEK inhibitor with IC50 of 8.2 nM,19 nM, 56 nM, and 160 nM for BRAF V600E, BRAF, CRAF, and MEK1, respectively. Phase 1.	MAPK	C21H18FN5O5S
Spebrutinib (CC-292, AVL-292)	423.44	BTK	85	200.737	<1		Spebrutinib (CC-292, AVL-292) is a covalent, orally active, and highly selective BTK inhibitor with IC50 of <0.5 nM, displaying at least 1400-fold selectivity over the other kinases assayed. Phase 1.	Angiogenesis	C22H22FN5O3
SKI II	302.78	S1P Receptor	61	201.466	<1		SKI II is a highly selective and non ATP-competitive?sphingosine kinase (SphK)?inhibitor with?IC50?of 0.5 μM, while exhibiting no inhibitory action on other kinases including PI3K, PKCα and ERK2.	GPCR & G Protein	C15H11ClN2OS
PF-543	502.07	S1P Receptor	93	185.233	<1		PF-543, a novel sphingosine-competitive inhibitor of SphK1, inhibits SphK1 with IC50 and Ki of 2.0 nM and 3.6 nM, exhibits >100-fold selectivity over the SphK2 isoform.	GPCR & G Protein	C27H31NO4S
CID755673	219.24	Serine/threonin kinase,CaMK	43	196.132	<1		CID755673 is a cell-active pan-PKD1/2/3 inhibitor with IC50 of 180 nM, 280nM, and 227 nM, respectively, about 200-fold selectivity over other CAMKs.	Apoptosis	C12H11NO3
1-Azakenpaullone	328.16	GSK-3	66	201.121	<1		1-Azakenpaullone is a potent and selective GSK-3β inhibitor with IC50 of 18 nM, >100-fold selectivity over CDK1/cyclin B and CDK5/p25.	PI3K/Akt/mTOR	C15H10BrN3O
GZD824 Dimesylate	724.77	Bcr-Abl	100	137.975	100	137.975	GZD824 Dimesylate is a novel orally bioavailable Bcr-Abl inhibitor for Bcr-Abl(WT) and Bcr-Abl(T315I) with IC50 of 0.34 nM and 0.68 nM, respectively.	Angiogenesis	C31H35F3N6O7S2
RKI-1447	326.37	ROCK	65	199.16	<1		RKI-1447 is a potent inhibitor of ROCK1 and ROCK2, with IC50 of 14.5 nM and 6.2 nM, respectively, has anti-invasive and antitumor activities.	Cell Cycle	C16H14N4O2S
BIO	356.17	GSK-3	71	199.343	<1		BIO is a specific inhibitor of GSK-3 with IC50 of 5 nM for GSK-3α/β in a cell-free assay, shows >16-fold selectivity over CDK5, also a pan-JAK inhibitor.	PI3K/Akt/mTOR	C16H10BrN3O2
CNX-2006	545.53	EGFR	100	183.308	<1		CNX-2006 is a novel irreversible mutant-selective EGFR inhibitor with IC50 of < 20 nM, with very weak inhibition at wild-type EGFR.	Protein Tyrosine Kinase	C26H27F4N7O2
Bisindolylmaleimide IX (Ro 31-8220 Mesylate)	553.65	PKC	100	180.62	<1		Bisindolylmaleimide IX (Ro 31-8220 Mesylate) is a pan-PKC inhibitor with IC50 of 5 nM, 24 nM, 14 nM, 27 nM, and 24 nM for PKC-α, PKC-βI, PKC-βII, PKC-γ, and PKC-ε, respectively, and also shows potent inhibition against MAPKAP-K1b, MSK1, GSK3β and S6K1.	TGF-beta/Smad	C26H27N5O5S2
Bisindolylmaleimide I (GF109203X)	412.48	PKC	82	198.798	<1		Bisindolylmaleimide I (GF109203X) is a potent PKC inhibitor with IC50 of 20 nM, 17 nM, 16 nM, and 20 nM for PKCα, PKCβI, PKCβII, and PKCγ in cell-free assays, respectively, showing more than 3000-fold selectivity for PKC as compared to EGFR, PDGFR and insulin receptor.	TGF-beta/Smad	C25H24N4O2
GSK650394	382.45	Others	76	198.719	<1		GSK650394 is a serum- and glucocorticoid-regulated kinase-1 inhibitor with IC50 of 62 nM and 103 nM for SGK1 and SGK2, respectively.	Others	C25H22N2O2
Skepinone-L	425.42	p38 MAPK	85	199.803	<1		Skepinone-L is a selective p38α-MAPK inhibitor with IC50 of 5 nM.	MAPK	C24H21F2NO4
Losmapimod (GW856553X)	383.46	p38 MAPK	76	198.195	<1		Losmapimod (GW856553X) is a selective, potent, and orally active p38 MAPK inhibitor with pKi of 8.1 and 7.6 for p38α and p38β, respectively. Phase 3.	MAPK	C22H26FN3O2
RepSox	287.32	TGF-beta/Smad	57	198.385	<1		RepSox is a potent and selective inhibitor of the TGFβR-1/ALK5 with IC50 of 23 nM and 4 nM for ATP binding to ALK5 and ALK5 autophosphorylation in cell-free assays, respectively.	TGF-beta/Smad	C17H13N5
Ro3280	543.61	PLK	100	183.955	<1		RO3280 is a potent, highly selective inhibitor of Polo-like kinase 1 (PLK1) with IC50 of 3?nM.	Cell Cycle	C27H35F2N7O3
AZD2858	453.52	GSK-3	7	15.4348	<1		AZD2858 is a selective GSK-3 inhibitor with an IC50 of 68 nM, activating Wnt signaling, increases bone mass in rats.	PI3K/Akt/mTOR	C21H23N7O3S
NMS-P937 (NMS1286937)	532.52	PLK	42	78.8703	<1		NMS-P937 (NMS1286937) is an orally available, selective Polo-like Kinase 1 (PLK1) inhibitor with IC50 of 2 nM, 5000-fold selectivity over PLK2/PLK3. Phase 1.	Cell Cycle	C24H27F3N8O3
CNX-774	499.5	BTK	100	200.2	<1		CNX-774 is an irreversible, orally active, and highly selective BTK inhibitor with IC50 of <1 nM.	Angiogenesis	C26H22FN7O3
SKLB1002	320.39	VEGFR	7	21.8484	<1		SKLB1002 is a potent and ATP-competitive VEGFR2 inhibitor with IC50 of 32 nM.	Protein Tyrosine Kinase	C13H12N4O2S2
FLLL32	464.55	JAK	92	198.041	<1		FLLL32 is a potent JAK2/STAT3 inhibitor with IC50 of <5 μM.	JAK/STAT	C28H32O6
PD173955	443.35	Bcr-Abl	15	33.8333	<1		PD173955 is a potent Bcr-Abl inhibitor with IC50 of 1-2 nM, also inhibiting Src activity with IC50 of 22 nM.	Angiogenesis	C21H18Cl2N4OS
FRAX597	558.1	PAK	14	25.0851	<1		FRAX597 is a potent, ATP-competitive inhibitor of group I PAKs with IC50 of 8 nM, 13 nM, and 19 nM for PAK1, PAK2, and PAK3, respectively.	Cytoskeletal Signaling	C29H28ClN7OS
Rociletinib (CO-1686, AVL-301)	555.55	EGFR	100	180.002	<1		Rociletinib (CO-1686, AVL-301) is an irreversible, mutant-selective EGFR inhibitor with Ki of 21.5 nM and 303.3 nM for EGFRL858R/T790M and EGFRWT in cell-free assays, respectively. Phase 2.	Protein Tyrosine Kinase	C27H28F3N7O3
RO9021	355.44	Syk	5	14.0671	<1		RO9021 potently inhibits SYK kinase activity with an average IC50 of 5.6 nM and suppresses B-cell receptor signaling.	Angiogenesis	C18H25N7O
PFK15	260.29	Autophagy	19	72.9955	<1		PFK15 is a potent and selective 6-phosphofructo-2-kinase (PFKFB3) inhibitor with IC50 of 207 nM.	Autophagy	C17H12N2O
TAK-632	554.52	Raf	100	180.336	<1		TAK-632 is a potent pan-Raf inhibitor with IC50 of 8.3 nM and 1.4 nM for B-Raf(wt) and C-Raf in cell-free assays, respectively, showing less or no inhibition against other tested kinases.	MAPK	C27H18F4N4O3S
Osimertinib (AZD9291)	499.61	EGFR	99	198.155	<1		Osimertinib (AZD9291) is an oral, irreversible, and mutant-selective EGFR inhibitor with IC50 of 12.92, 11.44 and 493.8 nM for Exon 19 deletion EGFR, L858R/T790M EGFR, and WT EGFR in LoVo cells, respectively. Phase 3.	Protein Tyrosine Kinase	C28H33N7O2
AZ5104	485.58	EGFR	97	199.761	<1		AZ5104, the demethylated metabolite of AZD-9291, is a potent EGFR inhibitor with IC50 of <1 nM, 6 nM, 1 nM, and 25 nM for EGFR (L858R/T790M), EGFR (L858R), EGFR (L861Q), and EGFR (wildtype), respectively. Phase 1.	Protein Tyrosine Kinase	C27H31N7O2
GSK2606414	451.44	PERK	90	199.362	<1		GSK2606414 is an orally available, potent, and selective PERK inhibitor with IC50 of 0.4 nM, displaying at least 100-fold selectivity over the other EIF2AKs assayed.	Apoptosis	C24H20F3N5O
SF1670	307.34	PTEN	29	94.358	<1		SF1670 is a highly potent and specific PTEN inhibitor with IC50 of 2 μM.	Others	C19H17NO3
WZ4003	496.99	AMPK	7	14.0848	<1		WZ4003 is a highly specific NUAK kinase inhibitor with IC50 of 20 nM and 100 nM for NUAK1 and NUAK2 in cell-base assays, respectively, without significant inhibition on 139 other kinases.	PI3K/Akt/mTOR	C25H29ClN6O3
HTH-01-015	468.55	AMPK	58	123.786	<1		HTH-01-015 is a potent and selective NUAK1 inhibitor with IC50 of 100 nM, >100-fold selectivity over NUAK2.	PI3K/Akt/mTOR	C26H28N8O
TG003	249.33	CDK	6	24.0645	<1		TG003 is a potent and ATP-competitive Cdc2-like kinase (Clk) inhibitor with IC50 of 20 nM, 200 nM, and 15 nM for Clk1, Clk2, and Clk4, respectively. No inhibitory effect on Clk3, SRPK1, SRPK2, or PKC.	Cell Cycle	C13H15NO2S
UNC2881	463.58	TAM Receptor	92	198.455	<1		UNC2881 is a specific Mer tyrosine kinase inhibitor with IC50 of 4.3 nM, about 83- and 58-fold selectivity over Axl and Tyro3, respectively.	Protein Tyrosine Kinase	C25H33N7O2
ID-8	298.29	DYRK	60	201.147	<1		ID-8 is a DYRK inhibitor, and sustains embryonic stem cell self-renewal in long-term culture.	Cell Cycle	C16H14N2O4
ERK5-IN-1	638.81	ERK	100	156.541	<1		ERK5-IN-1 is a potent, and selective ERK5 inhibitor with IC50 of 162 nM.	MAPK	C36H46N8O3
IPI-3063	455.51	PI3K	91	199.776	<1		IPI-3063 is a potent and selective p110δ inhibitor with biochemical IC50 of 2.5?±?1.2 nM and IC50 values for the other class I PI3K isoforms (p110α, p110β, p110γ) are at least 400-fold higher.	PI3K/Akt/mTOR	C25H25N7O2
AZ191	429.52	DYRK	85	197.895	<1		AZ191 is a potent and selective DYRK1B inhibitor with IC50 of 17 nM in a cell-free assay, about 5- and 110-fold selectivity over DYRK1A and DYRK2, respectively.	Protein Tyrosine Kinase	C24H27N7O
URMC-099	421.54	LRRK2	84	199.269	<1		URMC-099 is an orally bioavailable, brain penetrant mixed lineage kinase (MLK) inhibitor with IC50 of 19 nM, 42 nM, 14 nM, and 150 nM, for MLK1, MLK2, MLK3, and DLK, respectively, and also inhibits LRRK2 activity with IC50 of 11 nM.	Autophagy	C27H27N5
Bay 11-7085	249.33	IκB/IKK	50	200.537	<1		BAY 11-7085 is an irreversible inhibitor of TNFα-induced IκBα phosphorylation with IC50 of 10 μM.	NF-κB	C13H15NO2S
HS-173	422.46	PI3K	84	198.835	<1		HS-173 is a potent PI3Kα inhibitor with IC50 of 0.8 nM.	PI3K/Akt/mTOR	C21H18N4O4S
PF-562271 HCl	543.95	FAK	100	183.84	<1		PF-562271 HCl is the hydrochloride salt of PF-562271, which is a potent, ATP-competitive, reversible inhibitor of FAK with IC50 of 1.5 nM, ~10-fold less potent for Pyk2 than FAK and >100-fold selectivity against other protein kinases, except for some CDKs. Phase 1.	Angiogenesis	C21H21ClF3N7O3S
Poziotinib (HM781-36B)	491.34	HER2,EGFR	98	199.455	<1		Poziotinib (HM781-36B) is an irreversible pan-HER inhibitor with IC50 of 3.2 nM, 5.3 nM and 23.5 nM for HER1, HER2, and HER4, respectively. Phase 2.	Protein Tyrosine Kinase	C23H21Cl2FN4O3
K02288	352.38	TGF-beta/Smad	70	198.649	<1		K02288 is a potent, and selective type I BMP receptor inhibitor with IC50 of 1.1, 1.8, 6.4 nM for ALK2, ALK1 and ALK6, showing weaker inhibition on other ALKs (3, 4, 5) and ActRIIA.	TGF-beta/Smad	C20H20N2O4
GNE-0877	339.32	LRRK2	67	197.454	<1		GNE-0877 is a highly potent and selective leucine-rich repeat kinase 2 (LRRK2) inhibitor with Ki of 0.7 nM.	Autophagy	C14H16F3N7
GNE-9605	449.83	LRRK2	89	197.853	<1		GNE-9605 is a highly potent and selective leucine-rich repeat kinase 2 (LRRK2) inhibitor with Ki and IC50 of 2 nM and 19 nM, respectively.	Autophagy	C17H20ClF4N7O
Sorafenib	464.82	Raf	63	135.536	<1		Sorafenib is a multikinase inhibitor of Raf-1, B-Raf and VEGFR-2 with IC50 of 6 nM, 22 nM and 90 nM in cell-free assays, respectively.	MAPK	C21H16ClF3N4O3
CGP 57380	244.23	MNK	48	196.536	<1		CGP 57380 is a potent MNK1 inhibitor with IC50 of 2.2 μM, exhibiting no inhibitory activity on p38, JNK1, ERK1 and -2, PKC, or c-Src-like kinases.	MAPK	C11H9FN6
KN-62	721.84	CaMK	100	138.535	<1		KN-62 is a potent and specific inhibitor of Ca2+/calmodulin-dependent protein kinase II (CaMKII) with Ki of 0.9 μM also a non-competitive antagonist of the purinergic receptor P2RX7 (IC50 = 15 nM). It is selective for CaMKII relative to PKA, PKC and MLCK, but inhibits CaMKI and CaMKIV equally well, The Ki value of KN-62 for CaMK V is 0.8 μM.	Neuronal Signaling	C38H35N5O6S2
KN-93 Phosphate	599.03	CaMK	100	166.937	92	153.582	KN-93 Phosphate is a potent and specific inhibitor of Ca2+/calmodulin-dependent protein kinase II (CaMKII) with Ki of 0.37 μM, no remarkable inhibitory effects on APK, PKC, MLCK or Ca2+-PDE activities.	Neuronal Signaling	C26H32ClN2O8PS
AR-A014418	308.31	GSK-3	61	197.853	<1		AR-A014418 is an ATP-competitive, and selective GSK3β inhibitor with IC50 and Ki of 104 nM and 38 nM in cell-free assays, without significant inhibition on 26 other kinases tested.	PI3K/Akt/mTOR	C12H12N4O4S
NH125	524.56	CaMK	100	190.636	<1		NH125 is a selective eEF-2 kinase inhibitor with IC50 of 60 nM, >125-fold selectivity over PKC, PKA, and CaMKII, and also a potent histidine kinase inhibitor.	Neuronal Signaling	C27H45IN2
Ribociclib (LEE011)	434.54	CDK	7	16.109	<1		Ribociclib (LEE011) is an orally available, and highly specific CDK4/6 inhibitor. Phase 3.	Cell Cycle	C23H30N8O
LDC000067	370.43	CDK	74	199.768	<1		LDC000067 is a highly selective CDK9 inhibitor with IC50 of 44 nM, 55/125/210/ >227/ >227-fold selectivity over CDK2/1/4/6/7.	Cell Cycle	C18H18N4O3S
MPI-0479605	407.51	Kinesin	62	152.144	<1		MPI-0479605 is an ATP competitive and selective inhibitor of mitotic kinase Mps1 with IC50 of 1.8 nM, >40-fold selectivity over other kinases.	Cytoskeletal Signaling	C22H29N7O
Uprosertib (GSK2141795)	429.25	Akt	85	198.02	<1		Uprosertib (GSK2141795) is a selective, ATP-competitive, and orally bioavailable Akt inhibitor with IC50 of 180 nM, 328 nM, and 38 nM for Akt 1, 2 and 3, respectively. Phase 2.	PI3K/Akt/mTOR	C18H16Cl2F2N4O2
DDR1-IN-1	552.59	Others	100	180.966	<1		DDR1-IN-1 is a potent and selective discoidin domain receptor 1 (DDR1) receptor tyrosine kinase inhibitor with IC50 of 105 nM, about 3-fold selectivity over DDR2.	Others	C30H31F3N4O3
JNK Inhibitor IX	332.42	JNK	20	60.1649	<1		JNK inhibitor IX is a selective and potent JNK inhibitor with pIC50 of 6.5 and 6.7 for JNK2 and JNK3, respectively.	MAPK	C20H16N2OS
ML167	335.36	CDK	67	199.785	<1		ML167 is a highly selective Cdc2-like kinase 4 (Clk4) inhibitor with IC50 of 136 nM, >10-fold selectivity for closely related kinases Clk1-3 and Dyrk1A/1B.	Cell Cycle	C19H17N3O3
LY2857785	448.6	CDK	23	51.2706	<1		LY2857785 is a type I reversible and competitive ATP kinase inhibitor against CDK9(IC50=0.011 μM) and also inhibits other transcription kinases CDK8(IC50=0.016 μM) and CDK7 (IC50=0.246 μM).	Cell Cycle	C26H36N6O
GNF-5837	535.49	Trk receptor	100	186.745	<1		GNF-5837 is a selective, and orally bioavailable pan-TRK inhibitor for TrkA, and TrkB with IC50 of 8 nM, and 12 nM, respectively.	Protein Tyrosine Kinase	C28H21F4N5O2
Afuresertib (GSK2110183)	427.32	Akt	85	198.914	<1		Afuresertib (GSK2110183) is a potent, orally bioavailable Akt inhibitor with Ki of 0.08 nM, 2 nM, and 2.6 nM for Akt1, Akt2, and Akt3, respectively. Phase 2.	PI3K/Akt/mTOR	C18H17Cl2FN4OS
Entospletinib (GS-9973)	411.46	Syk	26	63.1896	<1		Entospletinib (GS-9973) is an orally bioavailable, selective Syk inhibitor with IC50 of 7.7 nM in a cell-free assay and showed 13- to >1000-fold cellular selectivity for Syk over other kinases(including Jak2, ckit, Flt3, Ret, KDR) as assessed by target protein phosphorylation or functional response.	Angiogenesis	C23H21N7O
FR 180204	327.34	ERK	65	198.57	<1		FR 180204 is an ATP-competitive, selective ERK inhibitor with Ki of 0.31 μM and 0.14 μM for ERK1 And ERK2, respectively. It is 30-fold less potent against the related kinase p38α and failed to inhibit any kinases(MEK1, MKK4, IKKα, PKCα, Src, Syc, and PDGFα) at less than 30 μM.	MAPK	C18H13N7
XMD8-92	474.55	ERK	73	153.83	<1		XMD8-92 is a potent and selective BMK1/ERK5 inhibitor with Kd of 80 nM.	MAPK	C26H30N6O3
GNF-5	418.37	Bcr-Abl	83	198.389	<1		GNF-5 is a selective and allosteric Bcr-Abl inhibitor with IC50 of 220 nM.	Angiogenesis	C20H17F3N4O3
GNE-7915	443.4	LRRK2	22	49.6166	<1		GNE-7915 is a highly potent, selective, and brain-penetrable leucine-rich repeat kinase 2 (LRRK2) inhibitor, with IC50 and Ki of 9 nM and 1 nM, respectively.	Autophagy	C19H21F4N5O3
Vactosertib ?(TEW-7197)	399.42	TGF-beta/Smad	79	197.787	<1		Vactosertib ?(TEW-7197) is a highly potent, selective, and orally bioavailable TGF-β receptor ALK4/ALK5 inhibitor with IC50 of 13 nM and 11 nM, respectively. Phase 1.	TGF-beta/Smad	C22H18FN7
Lorlatinib?(PF-6463922)	406.41	ALK	81	199.306	<1		PF-06463922 is a potent, dual ALK/ROS1 inhibitor with Ki of <0.02 nM, <0.07 nM, and 0.7 nM for ROS1, ALK (WT), and ALK (L1196M), respectively. Phase 1.	Protein Tyrosine Kinase	C21H19FN6O2
Decernotinib (VX-509)	392.38	JAK	78	198.787	<1		Decernotinib (VX-509) is a potent and selective JAK3 inhibitor with Ki of 2.5 nM, >4-fold selectivity over JAK1, JAK2, and TYK2, respectively. Phase 2/3.	JAK/STAT	C18H19F3N6O
G-749	521.41	FLT3	24	46.029	<1		G-749 is a novel and potent FLT3 inhibitor with IC50 of 0.4 nM, 0.6 nM and 1 nM for FLT3 (WT), FLT3 (D835Y), and Mer, respectively, showing lower potency against other tyrosine kinases.	Angiogenesis	C25H25BrN6O2
THZ1 2HCl	638.97	CDK	100	156.502	<1		THZ1 is a covalent CDK7 inhibitor which has the unprecedented ability to target a remote cysteine residue located outside of the canonical kinase domain, providing an unanticipated means of achieving selectivity for CDK7.	Cell Cycle	C31H30Cl3N7O2
CFI-400945	534.65	PLK	100	187.038	<1		CFI-400945 is an orally active, potent and selective polo-like kinase 4(PLK4) inhibitor with Ki value of 0.26 nM.	Cell Cycle	C33H34N4O3
GDC-0623	456.21	MEK	91	199.47	<1		GDC-0623 is a potent and ATP-uncompetitive MEK1 inhibitor with Ki of 0.13 nM. Phase 1.	MAPK	C16H14FIN4O3
CL-387785 (EKI-785)	381.23	EGFR	63	165.255	<1		CL-387785 (EKI-785) is an irreversible, and selective EGFR inhibitor with IC50 of 370 pM.	Protein Tyrosine Kinase	C18H13BrN4O
AT13148	313.78	Akt,S6 Kinase,ROCK,PKA	62	197.591	<1		AT13148 is an oral, ATP-competitive, multi-AGC kinase inhibitor with IC50 of 38 nM/402 nM/50 nM, 8 nM, 3 nM, and 6 nM/4 nM for Akt1/2/3, p70S6K, PKA, and ROCKI/II, respectively. Phase 1.	PI3K/Akt/mTOR	C17H16ClN3O
WH-4-023	568.67	Src	12	21.1019	<1		WH-4-023 is a potent and orally active Lck/Src inhibitor with IC50s of 2 nM and 6 nM in cell-free assays, respectively. Exhibits >300-fold selectivity against p38α and KDR. Also potently inhibits SIK (IC50 values are 10, 22 and 60 nM for SIK 1, 2 and 3 respectively) and displays selectivity over a range of closely related kinases.	Angiogenesis	C32H36N6O4
IM-12	377.41	GSK-3	75	198.723	<1		IM-12 is a selective GSK-3β inhibitor with IC50 of 53 nM, and also enhances canonical Wnt signalling.	PI3K/Akt/mTOR	C22H20FN3O2
UNC2025	513.12	TAM Receptor,FLT3	25	48.7215	100	194.886	UNC2025 is a potent and orally bioavailable dual MER/FLT3 inhibitor with IC50 of 0.74 nM and 0.8 nM, respectively, about 20-fold selectivity over Axl and Tyro3.	Protein Tyrosine Kinase	C28H41ClN6O
Anacardic Acid	348.52	Histone Acetyltransferase	69	197.98	<1		Anacardic Acid is a potent inhibitor of p300 and p300/CBP-associated factor histone acetyltranferases, which also has antibacterial activity, antimicrobial activity, prostaglandin synthase inhibition, and tyrosinase and lipoxygenase inhibition.	Epigenetics	C22H36O3
LRRK2-IN-1	570.69	LRRK2	100	175.226	<1		LRRK2-IN-1 is a potent and selective LRRK2 inhibitor with IC50 of 6 nM and 13 nM for LRRK2 (G2019S) and LRRK2 (WT), respectively.	Autophagy	C31H38N8O3
Reversine	393.23	Adenosine Receptor,Aurora Kinase	5	12.7152	<1		Reversine is a potent human A3 adenosine receptor antagonist with Ki of 0.66 μM, and a pan-aurora A/B/C kinase inhibitor with IC50 of 12 nM/13 nM/20 nM, respectively. Also used for stem cell dedifferentiation.	GPCR & G Protein	C21H27N7O
Filgotinib (GLPG0634)	425.5	JAK	85	199.765	<1		Filgotinib (GLPG0634) is a selective JAK1 inhibitor with IC50 of 10 nM, 28 nM, 810 nM, and 116 nM for JAK1, JAK2, JAK3, and TYK2, respectively. Phase 2.	JAK/STAT	C21H23N5O3S
PI-3065	506.64	PI3K	50	98.6894	<1		PI-3065 is a selective p110δ inhibitor with IC50 of 15 nM, >70-fold selectivity over other PI3K family members.	PI3K/Akt/mTOR	C27H31FN6OS
SD-208	352.75	TGF-beta/Smad	9	25.5138	<1		SD-208 is a selective TGF-βRI (ALK5) inhibitor with IC50 of 48 nM, >100-fold selectivity over TGF-βRII.	TGF-beta/Smad	C17H10ClFN6
LDN-214117	419.52	TGF-beta/Smad	83	197.845	<1		LDN-214117 is a potent and selective BMP type I receptor kinase ALK2 inhibitor with IC50 of 24 nM.	TGF-beta/Smad	C25H29N3O3
Cerdulatinib (PRT062070, PRT2070)	482	JAK	43	89.2116	<1		Cerdulatinib (PRT-062070) is an oral active, multi-targeted tyrosine kinase inhibitor with IC50 of 12 nM/6 nM/8 nM/0.5 nM and 32 nM for JAK1/JAK2/JAK3/TYK2 and Syk, respectively. Also inhibits 19 other tested kinases with IC50 less than 200 nM.	JAK/STAT	C20H28ClN7O3S
SU9516	241.25	CDK	48	198.964	<1		SU 9516 is a 3-substituted indolinone CDK inhibitor with IC50 of 22 nM, 40 nM, and 200 nM for CDK2, CDK1, and CDK4, respectively.	Cell Cycle	C13H11N3O2
LDC1267	560.55	TAM Receptor	100	178.396	<1		LDC1267 is a highly selective TAM kinase inhibitor with IC50 of <5 nM, 8 nM, and 29 nM for Mer, Tyro3, and Axl, respectively. Displays lower activity against Met, Aurora B, Lck, Src, and CDK8.	Protein Tyrosine Kinase	C30H26F2N4O5
D 4476	398.41	Casein Kinase	79	198.288	<1		D 4476 is a potent, selective, and cell-permeant CK1 (casein kinase 1) inhibitor with IC50 of 200 nM and 300 nM in a cell-free assay for CK1 from Schizosaccharomyces pombe and CK1δ, respectively. Also acts as an ALK5 inhibitor with IC50 of 500 nM.	Metabolism	C23H18N4O3
PF-431396	506.5	FAK	100	197.433	<1		PF-431396 is a dual PYK2/FAK inhibitor with IC50 of 11 nM and 2 nM, respectively.	Angiogenesis	C22H21F3N6O3S
Pilaralisib (XL147)	541.02	PI3K	100	184.836	<1		Pilaralisib (XL147) is a selective and reversible class I PI3K inhibitor for PI3Kα/δ/γ with IC50 of 39 nM/36 nM/23 nM in cell-free assays, less potent to PI3Kβ. Phase 1/2.	PI3K/Akt/mTOR	C25H25ClN6O4S
Voxtalisib (XL765, SAR245409)	270.29	mTOR,PI3K	54	199.785	<1		Voxtalisib (SAR245409, XL765) is a dual inhibitor of mTOR/PI3K, mostly for p110γ with IC50 of 9 nM also inhibits DNA-PK and mTOR. Phase 1/2.	Angiogenesis	C13H14N6O
OTS964	428.97	TOPK	85	198.149	<1		OTS964 is a potent TOPK inhibitor with high affinity and selectivity and IC50 value is 28 nM.	MAPK	C23H26Cl2N2O2S
Peficitinib (ASP015K, JNJ-54781532)	326.39	JAK	65	199.148	<1		Peficitinib (ASP015K, JNJ-54781532) is an orally bioavailable JAK inhibitor. Phase 3.	JAK/STAT	C18H22N4O2
OTS514 hydrochloride	400.92	TOPK	80	199.541	80	199.541	OTS514 is a highly potent TOPK(T-LAK cell-originated protein kinase) inhibitor with an IC50 value of 2.6 nM.	MAPK	C21H21ClN2O2S
PND-1186 (VS-4718)	501.5	FAK	24	47.8564	<1		PND-1186 (VS-4718) is a reversible and selective FAK inhibitor with IC50 of 1.5 nM. Phase 1.	Angiogenesis	C25H26F3N5O3
Ruboxistaurin (LY333531 HCl)	505.01	PKC	50	99.0079	<1		LY333531 is a β-specific protein kinase C inhibitor. It competitively and reversibly inhibits PKCβ1 and PKCβ2 with IC50 values of 4.7 and 5.9 nM respectively.	TGF-beta/Smad	C28H29ClN4O3
GSK2578215A	399.42	LRRK2	79	197.787	<1		GSK2578215A is a potent and selective LRRK2 kinase inhibitor with IC50 of 8.9 nM and 10.9 nM for LRRK2 (G2019S) and LRRK2 (WT), respectively.	Autophagy	C24H18FN3O2
CH5183284 (Debio-1347)	356.38	FGFR	71	199.226	<1		CH5183284 is a selective and orally available FGFR inhibitor with IC50 of 9.3 nM, 7.6 nM, 22 nM, and 290 nM for FGFR1, FGFR2, FGFR3, and FGFR4, respectively. Phase 1.	Angiogenesis	C20H16N6O
SU5402	296.32	FGFR,VEGFR	59	199.109	<1		SU5402 is a potent multi-targeted receptor tyrosine kinase inhibitor with IC50 of 20 nM, 30 nM, and 510 nM for VEGFR2, FGFR1, and PDGF-Rβ, respectively.	Protein Tyrosine Kinase	C17H16N2O3
Picropodophyllin (PPP)	414.41	IGF-1R	82	197.872	<1		Picropodophyllin (PPP) is a IGF-1R inhibitor with IC50 of 1 nM. It displays selectivity for IGF-1R and does not coinhibit tyrosine phosphorylation the IR, or of a selected panel of receptors less related to IGF-IR(FGF-R, PDGF-R, OR EGF-R).	Protein Tyrosine Kinase	C22H22O8
NPS-1034	551.54	c-Met,TAM Receptor	100	181.311	<1		NPS-1034 is a dual Met/Axl inhibitor with IC50 of 48 nM and 10.3 nM, respectively.	Protein Tyrosine Kinase	C31H23F2N5O3
Savolitinib(AZD6094, HMPL-504)	345.36	c-Met	16	46.3285	<1		Savolitinib (volitinib, AZD6094, HMPL-504) is a novel, potent, and selective MET inhibitor currently in clinical development in various indications, including PRCC. The IC50 values of this compound for c-Met and p-Met are 5 nM and 3 nM, respectively. It shows exquisite selectivity for c-Met over 274 kinase.	Protein Tyrosine Kinase	C17H15N9
PF-4989216	380.4	PI3K	76	199.79	<1		PF-4989216 is a potent and selective PI3K inhibitor with IC50 of 2 nM, 142 nM, 65 nM, 1 nM, and 110 nM for p110α, p110β, p110γ, p110δ, and VPS34, respectively.	PI3K/Akt/mTOR	C18H13FN6OS
PIK-III	319.36	Autophagy,PI3K	63	197.27	<1		PIK-III, which is a selective inhibitor of ?VPS34 enzymatic activity, inhibits autophagy and de novo lipidation of LC3 and leads to the stabilization of autophagy substrates. The IC50 values for VPS34 and PI(3)Kδ are 0.018 μM and 1.2 μM respectively.	Autophagy	C17H17N7
GSK269962A HCl	607.06	ROCK	100	164.728	<1		GSK269962 is a selective ROCK(Rho-associated protein kinase) inhibitor with IC50 values of 1.6 and 4 nM for ROCK1 and ROCK2, respectively.	Cell Cycle	C29H31ClN8O5
PS-1145	322.75	IκB/IKK	64	198.296	<1		PS-1145 is a specific IKK inhibitor with IC50 of 88 nM.	NF-κB	C17H11ClN4O
AZD6738	412.51	ATM/ATR	82	198.783	<1		AZD6738 is an orally active, and selective ATR kinase inhibitor with IC50 of 1 nM. Phase 1/2.	PI3K/Akt/mTOR	C20H24N6O2S
AZD8186	457.47	PI3K	91	198.92	<1		AZD8186 is a potent and selective inhibitor of PI3Kβ and PI3Kδ with IC50 of 4 nM and 12 nM, respectively. Phase 1.	PI3K/Akt/mTOR	C24H25F2N3O4
LY2409881	594.43	IκB/IKK	20	33.6457	<1		LY2409881 is a potent and selective IKK2 inhibitor with IC50 of 30 nM, >10-fold selectivity over IKK1 and other common kinases.	NF-κB	C24H32Cl4N6OS
LY2584702 Tosylate	617.62	S6 Kinase	7	11.3338	<1		LY2584702 Tosylate is a selective, ATP-competitive <B>p70S6K inhibitor with IC50 of 4 nM. Phase 1.	PI3K/Akt/mTOR	C28H27F4N7O3S
VX-11e	500.35	ERK	100	199.86	<1		VX-11e is a potent, selective, and orally bioavailable ERK2 inhibitor with Ki of <2 nM, over 200-fold selective over other kinases tested.	MAPK	C24H20Cl2FN5O2
FIIN-2	634.73	FGFR	69	108.708	<1		FIIN-2 is an irreversible, pan-FGFR inhibitor with IC50 of 3.09 nM, 4.3 nM, 27 nM and 45.3 nM for FGFR1/2/3/4, respectively.	Protein Tyrosine Kinase	C35H38N8O4
SBE 13 HCl	479.4	PLK	95	198.164	<1		SBE 13 HCl is a potent and selective PLK1 inhibitor with IC50 of 200 pM, >4000-fold selectivity over Aurora A kinase, Plk2 and Plk3.	Cell Cycle	C24H28Cl2N2O4
Bikinin	273.08	GSK-3	54	197.744	<1		Bikinin is an ATP-competitive Arabidopsis GSK-3 inhibitor, and acts as a strong activator of brassinosteroid (BR) signaling.	PI3K/Akt/mTOR	C9H9BrN2O3
BLZ945	398.48	CSF-1R	79	198.253	<1		BLZ945 is an orally active, potent and selective CSF-1R inhibitor with IC50 of 1 nM, >1000-fold selective against its closest receptor tyrosine kinase homologs.	Protein Tyrosine Kinase	C20H22N4O3S
LFM-A13	360	BTK	72	200	<1		LFM-A13 is a specific Bruton's tyrosine kinase (BTK) inhibitor with IC50 of 2.5 μM, >100-fold selectivity over other protein kinases including JAK1, JAK2, HCK, EGFR,and IRK.	Angiogenesis	C11H8Br2N2O2
PRT-060318 2HCl	413.34	Syk	75	181.449	75	181.449	PRT-060318 (PRT318) is a novel selective inhibitor of the Syk tyrosine kinase with an IC50 of 4 nM, as an approach to HIT treatment.	Angiogenesis	C18H27Cl3N6O
SAR-020106	382.85	Chk	20	52.2398	<1		SAR-020106 is an ATP-competitive, potent, and selective CHK1 inhibitor with an IC50 of 13.3 nM.	Cell Cycle	C19H19ClN6O
SB239063	368.4	p38 MAPK	60	162.866	<1		SB239063 is a potent and selective p38 MAPKα/β inhibitor with IC50 of 44 nM, showing no activity against the γ- and δ-kinase isoforms.	MAPK	C20H21FN4O2
CCT196969	513.52	Raf,Src	100	194.734	<1		CCT196969 is a novel orally available, pan-RAF inhibitor with anti-SRC activity. It also inhibits SRC, LCK, and the p38 MAPKs.	MAPK	C27H24FN7O3
ANA-12	407.49	Trk receptor	37	90.7998	<1		ANA-12 is a selective TrkB antagonist with Kd of 10 nM and 12 μM for the high and low affinity sites, respectively.	Protein Tyrosine Kinase	C22H21N3O3S
Ro-3306	351.45	CDK	13	36.9896	<1		RO-3306 is an ATP-competitive, and selective CDK1 inhibitor with Ki of 20 nM, >15-fold selectivity against a diverse panel of human kinases.	Cell Cycle	C18H13N3OS2
Pluripotin (SC1)	550.53	ERK	100	181.643	<1		Pluripotin (SC1) is a dual inhibitor of extracellular signal-regulated kinase 1 (ERK1, MAPK3) and RasGAP with Kd values of 98 nM and 212 nM respectively. It maintains embryonic stem cell (ESC) self-renewal.	MAPK	C27H25F3N8O2
Gilteritinib (ASP2215)	552.71	FLT3,TAM Receptor	100	180.927	<1		Gilteritinib(ASP2215) is a small-molecule FLT3/AXL inhibitor with IC50 values of 0.29 nM and 0.73 nM for FLT3 and AXL, respectively. It inhibits FLT3 at an IC50 value that was approximately 800-fold more potent than the concentration required to inhibit c-KIT (230 nM).	Protein Tyrosine Kinase	C29H44N8O3
Dovitinib (TKI258) Lactate	482.51	FLT3,c-Kit,FGFR,PDGFR,VEGFR	100	207.25	66	136.785	Dovitinib (TKI258) Lactate is the Lactate of Dovitinib, which is a multitargeted RTK inhibitor, mostly for class III (FLT3/c-Kit) with IC50 of 1 nM/2 nM, also potent to class IV (FGFR1/3) and class V (VEGFR1-4) RTKs with IC50 of 8-13 nM, less potent to InsR, EGFR, c-Met, EphA2, Tie2, IGFR1 and HER2. Phase 4.	Angiogenesis	C24H27FN6O4
SU6656	371.45	Src	74	199.219	<1		SU 6656 is a selective Src family kinase inhibitor with IC50 of 280 nM, 20 nM, 130 nM, and 170 nM for Src, Yes, Lyn, and Fyn, respectively.	Angiogenesis	C19H21N3O3S
Akti-1/2	551.64	Akt	22	39.8811	<1		Akti-1/2 is a highly selective Akt1/Akt2 inhibitor with IC50 of 58 nM/210 nM, respectively, about 36-fold selectivity for Akt1 over Akt3.	PI3K/Akt/mTOR	C34H29N7O
Sunitinib	398.47	PDGFR,c-Kit,VEGFR	25	62.74	<1		Sunitinib is a multi-targeted RTK inhibitor targeting VEGFR2 (Flk-1) and PDGFRβ with IC50 of 80 nM and 2 nM, and also inhibits c-Kit.	Protein Tyrosine Kinase	C22H27FN4O2
Dasatinib Monohydrate	506.02	Src,c-Kit,Bcr-Abl	21	41.5003	<1		Dasatinib Monohydrate is a novel, potent and multi-targeted inhibitor that targets Abl, Src and c-Kit, with IC50 of <1 nM, 0.8 nM and 79 nM, respectively.	Angiogenesis	C22H28ClN7O3S
Erlotinib	393.44	EGFR	78	198.251	<1		Erlotinib is an EGFR inhibitor with IC50 of 2 nM, >1000-fold more sensitive for EGFR than human c-Src or v-Abl.	Protein Tyrosine Kinase	C22H23N3O4
Purvalanol A	388.89	CDK	60	154.285	<1		Purvalanol A is a potent, and cell-permeable CDK inhibitor with IC50 of 4 nM, 70 nM, 35 nM, and 850 nM for cdc2-cyclin B, cdk2-cyclin A, cdk2-cyclin E, and cdk4-cyclin D1, respectively.	Cell Cycle	C19H25ClN6O
GNE-317	414.48	PI3K	47	113.395	<1		GNE-317 is a potent, brain-penetrant PI3K inhibitor.	PI3K/Akt/mTOR	C19H22N6O3S
Pexmetinib (ARRY-614)	556.63	p38 MAPK,Tie-2	100	179.653	<1		Pexmetinib (ARRY-614) is a potent, orally bioavailable, dual p38 MAPK/Tie-2 inhibitor with IC50 of 4 nM/18 nM in a HEK-293 cell line. Phase 1.	MAPK	C31H33FN6O3
FRAX486	513.39	PAK	22	42.8524	<1		FRAX486 is a potent p21-activated kinase (PAK) inhibitor with IC50 values of 14, 33, 39 and 575 nM for PAK1, PAK2, PAK3 and PAK4 respectively.	Cytoskeletal Signaling	C25H23Cl2FN6O
AT7519 HCl	418.71	CDK	52	124.191	43	102.696	AT7519 HCl is a multi-CDK inhibitor for CDK1, 2, 4, 6 and 9 with IC50 of 10-210 nM in cell-free assays. It is less potent to CDK3 and little active to CDK7. Phase 2.	Cell Cycle	C16H18Cl3N5O2
Afatinib (BIBW2992) Dimaleate	717.18	EGFR,HER2	100	139.435	<1		Afatinib (BIBW2992) Dimaleate irreversibly inhibits EGFR/HER2 including EGFR(wt), EGFR(L858R), EGFR(L858R/T790M) and HER2 with IC50 of 0.5 nM, 0.4 nM, 10 nM and 14 nM, respectively 100-fold more active against Gefitinib-resistant L858R-T790M EGFR mutant.	Protein Tyrosine Kinase	C32H33ClFN5O11
Itacitinib (INCB39110)	553.51	JAK	100	180.665	<1		Itacitinib(INCB39110) is an orally bioavailable inhibitor of Janus-associated kinase 1 (JAK1) with potential antineoplastic activity.	JAK/STAT	C26H23F4N9O
AMG319	385.4	PI3K	77	199.792	<1		AMG319 is a potent and selective PI3Kδ inhibitor with IC50 of 18 nM, >47-fold selectivity over other PI3Ks. Phase 2.	PI3K/Akt/mTOR	C21H16FN7
Pexidartinib (PLX3397)	417.81	CSF-1R,c-Kit	83	198.655	<1		Pexidartinib (PLX3397) is an oral, potent mutil-targeted receptor tyrosine kinase inhibitor of CSF-1R, Kit, and Flt3 with IC50 of 20 nM, 10 nM and 160 nM, respectively. Phase 3.	Protein Tyrosine Kinase	C20H15ClF3N5
Nazartinib (EGF816, NVS-816)	495.02	EGFR	99	199.992	<1		Nazartinib (EGF816, NVS-816) is a covalent, irreversible, mutant-selective EGFR inhibitor that has nanomolar inhibitory potency against activating mt (L858R, ex19del) and T790M mt, with up to 60-fold selectivity over wild type (wt) EGFR in vitro.	Angiogenesis	C26H31ClN6O2
BI-847325	464.56	MEK,Aurora Kinase	19	40.8989	<1		BI-847325 is an orally bioavailable, and selective dual MEK/Aurora kinase inhibitor with IC50 of 3 nM, 25 nM, 15 nM, 25 nM, and 4 nM for Xenopus laevis Aurora B, human Aurora A and Aurora C, as well as human MEK1 and MEK2, respectively. Phase 1.	MAPK	C29H28N4O2
SGI-7079	455.53	VEGFR	91	199.767	<1		SGI-7079, a novel selective Axl inhibitor with an IC50 of 58 nM in vitro, inhibits tumor growth in a dose dependent manner and is a potential therapeutic target for overcoming EGFR inhibitor resistance.	Protein Tyrosine Kinase	C26H26FN7
AZD3264	441.5	IκB/IKK	88	199.32	<1		AZD3264 is a novel IKK2 inhibitor.	NF-κB	C21H23N5O4S
Ulixertinib (BVD-523, VRT752271)	433.33	ERK	86	198.463	<1		Ulixertinib (BVD-523, VRT752271) is a potent and reversible ERK1/ERK2 inhibitor with IC50 of <0.3 nM for ERK2. Phase 1.	MAPK	C21H22Cl2N4O2
SC79	364.78	Akt	72	197.379	<1		SC79 is a brain-penetrable Akt phosphorylation activator and an inhibitor of Akt-PH domain translocation.	PI3K/Akt/mTOR	C17H17ClN2O5
LJH685	381.42	S6 Kinase	76	199.255	<1		LJH685 is a potent pan-RSK inhibitor with IC50 of 6 nM, 5 nM and 4 nM for RSK1, RSK2, and RSK3, respectively.	PI3K/Akt/mTOR	C22H21F2N3O
LJI308	368.38	S6 Kinase	73	198.165	<1		LJI308 is a potent, and pan-RSK (p90 ribosomal S6 kinase) inhibitor with IC50 of 6 nM, 4 nM, and 13 nM for RSK1, RSK2, and RSK3, respectively.	PI3K/Akt/mTOR	C21H18F2N2O2
ONO-4059 analogue	456.5	BTK	20	43.8116	<1		ONO-4059 analogue is an analogue of ONO-4059, which is a highly potent and selective oral BTK inhibitor with IC50 of 23.9 nM. Phase 1.	Angiogenesis	C25H24N6O3
SBI-0206965	489.32	Autophagy	97	198.234	<1		SBI-0206965 is a highly selective autophagy kinase ULK1 inhibitor with IC50 of 108 nM, about 7-fold selectivity over ULK2.	Autophagy	C21H21BrN4O5
CC-223	397.47	mTOR	79	198.757	<1		CC-223 is a potent, selective, and orally bioavailable mTOR inhibitor with IC50 of 16 nM, >200-fold selectivity over the related PI3K-α. Phase 1/2.	PI3K/Akt/mTOR	C21H27N5O3
CC-115	336.35	DNA-PK,mTOR	67	199.197	<1		CC-115 is a dual inhibitor of DNA-dependent protein kinase (DNA-PK) and mammalian target of rapamycin (mTOR) with IC50 values of 0.013 μM and 0.021 μM, respectively. It has potential antineoplastic activity.	DNA Damage	C16H16N8O
BIO-acetoxime	398.21	GSK-3	19	47.7135	<1		BIO-acetoxime is a potent dual GSK3α/β inhibitor with IC50 of 10 nM, >240-fold selectivity over CDK5/p25, CDK2/cyclin A and CDK1/cyclin B.	PI3K/Akt/mTOR	C18H12BrN3O3
Kenpaullone	327.18	CDK	65	198.667	<1		Kenpaullone is an ATP-competitive inhibitor of cyclin-dependent kinases (CDKs). It also inhibit glycogen synthase kinase 3β (GSK3β) with IC50 of 0.23 ?M.	Cell Cycle	C16H11BrN2O
DEL-22379	444.53	ERK	89	200.211	<1		DEL-22379 is a water-soluble ERK dimerization inhibitor with IC50 of ?0.5 μM.	MAPK	C26H28N4O3
Y-39983 HCl	353.25	ROCK	63	178.344	63	178.344	Y-39983 is a selective rho-associated protein kinase(ROCK) inhibitor with an IC50 of 3.6 nM.	Cell Cycle	C16H18Cl2N4O
KD025 (SLx-2119)	452.51	ROCK	90	198.891	<1		KD025 is an orally available, and selective ROCK2 inhibitor with IC50 and Ki of 60 nM and 41 nM, respectively. Phase 2.	Cell Cycle	C26H24N6O2
Nemiralisib (GSK2269557)	440.54	PI3K	88	199.755	<1		Nemiralisib, also known as GSK-2269557, is a potent and selective PI3Kδ inhibitor(pKi = 9.9).	PI3K/Akt/mTOR	C26H28N6O
GSK2292767	512.58	PI3K	100	195.091	<1		GSK2292767 is a potent and selective PI3Kδ inhibitor.	PI3K/Akt/mTOR	C24H28N6O5S
NSC12	484.52	FGFR	96	198.134	<1		NSC12 is an orally available pan-FGF trap able to inhibit FGF2/FGFR interaction and endowed with promising antitumor activity.	Angiogenesis	C24H34F6O3
MRT67307 HCl	464.6	IκB/IKK	92	198.02	92	198.02	MRT67307 is a potent and dual IKK? and TBK1 inhibitor with IC50 of 160 and 19 nM, respectively.	NF-κB	C26H36N6O2R
MRT68921 HCl	434.58	Autophagy	10	23.0107	<1		MRT68921 is a potent and dual autophagy kinase ULK1/2 inhibitor with IC50 of 2.9 nM and 1.1 nM, respectively.	Autophagy	C25H34N6OR
CP21R7 (CP21)	317.34	Wnt/beta-catenin	63	198.525	<1		CP21R7, also known CP21, is a potent and selective GSK-3β inhibitor that can potently activate canonical Wnt signalling.	Stem Cells & Wnt	C19H15N3O2
Larotrectinib (LOXO-101) sulfate	526.51	Trk receptor	100	189.93	<1		Larotrectinib (LOXO-101) sulfate is an oral potent and selective ATP-competitive inhibitor of tropomyosin receptor kinases (TRK).	Protein Tyrosine Kinase	C21H24F2N6O6S
TIC10	386.49	Akt	77	199.229	<1		TIC10 inactivates Akt and ERK to induce TRAIL through Foxo3a, possesses superior drug properties: delivery across the blood-brain barrier, superior stability and improved pharmacokinetics. Phase 1/2.	PI3K/Akt/mTOR	C24H26N4O
PLX7904	512.53	Raf	100	195.111	<1		PLX7904, also known as PB04, is a potent and selective paradox-breaker RAF inhibitor. It is able to efficiently inhibit activation of ERK1/2 in mutant BRAF melanoma cells but does not hyperactivate ERK1/2 in mutant RAS-expressing cells.	MAPK	C24H22F2N6O3S
PLX8394	542.53	Raf	100	184.322	<1		PLX8394 is a next-generation, orally available, small-molecule <b>BRAF</b> inhibitor with IC50 values of 3.8 nM, 14 nM and 23 nM for BRAF(V600E), WT BRAF and CRAF respectively. It has potential antineoplastic activity.	MAPK	C25H21F3N6O3S
AZD8835	469.54	PI3K	93	198.066	<1		AZD8835 ia a novel mixed inhibitor of PI3Kα and PI3Kδ with IC50 of 6.2 nM and 5.7 nM, respectively, also with selectivity against PI3Kβ (IC50=431 nM) and PI3Kγ (IC50=90 nM).	PI3K/Akt/mTOR	C22H31N9O3
AZD3759	459.9	EGFR	91	197.869	<1		AZD3759 is a potent, oral active, CNS-penetrant EGFR inhibitor with IC50 of 0.3 nM, 0.2 nM, and 0.2 nM for EGFR (WT), EGFR (L858R), and EGFR (exon 19Del), respectively. Phase 1.	Protein Tyrosine Kinase	C22H23ClFN5O3
VPS34-IN1	425.91	PI3K	85	199.573	<1		Vps34-IN1 is a potent and highly selective Vps34 inhibitor with IC50 of 25 nM invitro,which does not significantly inhibit the isoforms of class I as well as class II PI3Ks.	PI3K/Akt/mTOR	C21H24ClN7O
LDC4297 (LDC044297)	432.52	CDK	86	198.835	27	62.4249	LDC4297 is a novel CDK7 inhibitor (IC50=0.13±0.06 nM for CDK7 versus IC50s between 10 nM and 10,000 nM for all other analyzed CDKs).	Cell Cycle	C23H28N8O
Ripasudil (K-115) hydrochloride dihydrate	395.88	ROCK	26	65.6765	79	199.555	Ripasudil (K-115) hydrochloride dihydrate is potent ROCK inhibitor with IC50 of 51 nM and 19 nM for ROCK1 and ROCK2, respectively, used for the treatment of glaucoma and ocular hypertension.	Cell Cycle	C15H23ClFN3O4S
Entrectinib (RXDX-101)	560.64	Trk receptor,ALK	100	178.368	<1		Entrectinib (RXDX-101) is an orally bioavailable pan-TrkA/B/C, ROS1 and ALK inhibitor with IC50 ranging between 0.1 and 1.7 nM. Phase 2.	Protein Tyrosine Kinase	C31H34F2N6O2
GSK2636771	433.42	PI3K	28	64.6025	<1		GSK2636771 is a potent, orally bioavailable and selective inhibitor of PI3Kβ with >900-fold selectivity over PI3Kα/PI3Kγ and >10-fold over PI3Kδ. Sensitive to PTEN null cell lines.	PI3K/Akt/mTOR	C22H22F3N3O3
PQ 401	341.79	IGF-1R	32	93.6247	<1		PQ401 inhibits autophosphorylation of IGF-1R domain with IC50 of <1 μM.	Protein Tyrosine Kinase	C18H16ClN3O2
ZM 39923 HCl	367.91	JAK	30	81.5417	<1		ZM 39923 HCl is an JAK1/3 inhibitor with pIC50 of 4.4/7.1, almost no activity to JAK2 and modestly potent to EGFR also found to be sensitive to transglutaminase.	JAK/STAT	C23H26ClNO
SMI-4a	273.23	Pim	55	201.296	<1		SMI-4a is a potent inhibitor of?Pim1?with?IC50?of 17 nM, modestly potent to Pim-2, does not significantly inhibit any other serine/threonine- or tyrosine-kinases.	JAK/STAT	C11H6F3NO2S
VE-821	368.41	ATM/ATR	74	200.863	<1		VE-821 is a potent and selective ATP competitive inhibitor of ATR with Ki/IC50 of 13 nM/26 nM in cell-free assays, shows inhibition of H2AX phosphorylation, minimal activity against PIKKs ATM, DNA-PK, mTOR and PI3Kγ.	DNA Damage	C18H16N4O3S
AG-18	186.17	EGFR	37	198.743	<1		AG-18 inhibits EGFR with IC50 of 35 μM.	Protein Tyrosine Kinase	C10H6N2O2
CEP-32496	517.46	CSF-1R,Raf	9	17.3926	<1		CEP-32496 is a highly potent inhibitor of BRAF(V600E/WT) and c-Raf with Kd of 14 nM/36 nM and 39 nM, also potent to Abl-1, c-Kit, Ret, PDGFRβ and VEGFR2, respectively insignificant affinity for MEK-1, MEK-2, ERK-1 and ERK-2. Phase 1/2.	MAPK	C24H22F3N5O5
AZD5363	428.92	Akt	86	200.504	<1		AZD5363 potently inhibits all isoforms of Akt(Akt1/Akt2/Akt3) with IC50 of 3 nM/8 nM/8 nM in cell-free assays, similar to P70S6K/PKA and lower activity towards ROCK1/2. Phase 2.	PI3K/Akt/mTOR	C21H25ClN6O2
TCS 359	360.43	FLT3	15	41.617	<1		TCS 359 is a potent FLT3 inhibitor with IC50 of 42 nM.	Angiogenesis	C18H20N2O4S
Tyrphostin AG 1296	266.29	c-Kit,PDGFR	6	22.5318	<1		Tyrphostin AG 1296 is an inhibitor of PDGFR with IC50 of 0.3-0.5 μM, no activity to EGFR.	Protein Tyrosine Kinase	C16H14N2O2
PRT062607 (P505-15, BIIB057) HCl	429.91	Syk	86	200.042	86	200.042	PRT062607 (P505-15, BIIB057) HCl is a novel, highly selective Syk inhibitor with IC50 of 1 nM in cell-free assays, >80-fold selective for Syk than Fgr, Lyn, FAK, Pyk2 and Zap70.	Angiogenesis	C19H24ClN9O
Butein	272.25	EGFR	55	202.02	<1		Butein, a plant polyphenol isolated from Rhus verniciflua, is able to inhibit the activation of protein tyrosine kinase, NF-κB and STAT3, also inhibits EGFR.	Protein Tyrosine Kinase	C15H12O5
GDC-0349	452.55	mTOR	91	201.083	<1		GDC-0349 is a potent and selective ATP-competitive inhibitor of mTOR with Ki of 3.8 nM, 790-fold inhibitory effect against PI3Kα and other 266 kinases. Phase 1.	PI3K/Akt/mTOR	C24H32N6O3
Cobimetinib (GDC-0973, RG7420)	531.31	MEK	100	188.214	<1		Cobimetinib (GDC-0973, RG7420) is a potent and highly selective MEK1 inhibitor with IC50 of 4.2 nM, showing more than 100-fold selectively for MEK1 over MEK2 and showed no significant inhibition when tested against a panel of more than 100 of serine-threonine and tyrosine kinases. Phase 3.	MAPK	C21H21F3IN3O2
GW2580	366.41	CSF-1R	48	131.001	<1		GW2580 is a selective CSF-1R inhibitor for c-FMS with IC50 of 30 nM, 150- to 500-fold selective compared to b-Raf, CDK4, c-KIT, c-SRC, EGFR, ERBB2/4, ERK2, FLT-3, GSK3, ITK, JAK2 etc.	Protein Tyrosine Kinase	C20H22N4O3
BMS-345541	255.32	IκB/IKK	9	35.2499	<1		BMS-345541 is a highly selective inhibitor of the catalytic subunits of IKK-2 and IKK-1 with IC50 of 0.3 μM and 4 μM in cell-free assays, respectively.	NF-κB	C14H17N5
ETP-46464	470.52	ATM/ATR,mTOR	6	12.7518	<1		ETP-46464 is a potent and selective inhibitor of ATR with IC50 of 25 nM.	PI3K/Akt/mTOR	C30H22N4O2
ASP3026	580.74	ALK	14	24.1072	<1		ASP3026 is a novel and selective inhibitor for ALK with IC50 of 3.5 nM. Phase 1.	Protein Tyrosine Kinase	C29H40N8O3S
Pacritinib (SB1518)	472.58	FLT3,JAK	11	23.2765	<1		Pacritinib (SB1518) is a potent and selective inhibitor of Janus Kinase 2 (JAK2) and Fms-Like Tyrosine Kinase-3 (FLT3) with IC50s of 23 and 22 nM in cell-free assays, respectively. Phase 3.	JAK/STAT	C28H32N4O3
P276-00	438.3	CDK	88	200.776	88	200.776	P276-00 is a novel CDK1, CDK4 and CDK9 inhibitor with IC50 of 79 nM, 63 nM and 20 nM, respectively. Phase 2/3.	Cell Cycle	C21H21Cl2NO5
Bardoxolone Methyl	505.69	IκB/IKK	21	41.5274	<1		Bardoxolone Methyl is an IKK inhibitor, showing potent proapoptotic and anti-inflammatory activities Also a potent Nrf2 activator and nuclear factor-κB (NF-κB) inhibitor.	NF-κB	C32H43NO4
Mirin	220.25	ATM/ATR	44	199.773	<1		Mirin is a potent Mre11–Rad50–Nbs1 (MRN) complex inhibitor, and inhibits Mre11-associated exonuclease activity.	DNA Damage	C10H8N2O2S
K03861	501.5	CDK	100	199.402	<1		K03861 is a type II CDK2 inhibitor with Kd of 50 nM, 18.6 nM, 15.4 nM, and 9.7 nM for CDK2(WT), CDK2(C118L), CDK2(A144C), and CDK2(C118L/A144C), respectlvely.	Cell Cycle	C24H26F3N7O2
Acalabrutinib (ACP-196)	465.51	BTK	93	199.781	<1		Acalabrutinib(ACP-196) is a selective second-generation Bruton's tyrosine kinase (BTK) inhibitor with an IC50 of 3 nM, which prevents the activation of the B-cell antigen receptor (BCR) signaling pathway. ACP-196 has improved target specificity over ibrutinib with 323-, 94-, 19- and 9-fold selectivity over the other TEC kinase family members (ITK, TXK, BMX, and TEC, respectively) and no activity …	Angiogenesis	C26H23N7O2
BMS-582949	406.48	p38 MAPK	81	199.272	<1		BMS-582949 is a potent and selective p38 mitogen-activated protein kinase (p38 MAPK) inhibitor with IC50 of 13nM,inhibiting both p38 kinase activity and activation of p38.	MAPK	C22H26N6O2
Pamapimod (R-1503, Ro4402257)	406.38	p38 MAPK	81	199.321	<1		Pamapimod (R-1503, Ro4402257) is a novel, selective inhibitor of p38 mitogen-activated protein kinase. It inhibits p38α and p38β enzymatic activity with IC50 values of 0.014±0.002 and 0.48± 0.04 microM, respectively with no activity against p38delta or p38gamma isoforms.	MAPK	C19H20F2N4O4
Deguelin	394.42	Akt,PI3K	78	197.759	<1		Deguelin, a natural product isolated from plants in the Mundulea sericea family, is an PI3K/AKT Inhibitor.	PI3K/Akt/mTOR	C23H22O6
Radotinib	530.5	Bcr-Abl	100	188.501	<1		Radotinib is a selective BCR-ABL1 tyrosine kinase inhibitor with IC50 of 34 nM, used to treat Chronic Myeloid Leukemia.	Angiogenesis	C27H21F3N8O
GNF-7	547.53	Bcr-Abl	20	36.5277	<1		GNF-7 is a potent type-II kinase Bcr-Abl inhibitor with IC50 of <5 nM, 61 nM, 122 nM, 136 nM, and 133 nM for M351T, T315I, E255 V, G250E, and c-Abl, respectively.	Angiogenesis	C28H24F3N7O2
PD0166285	512.43	Wee1	100	195.149	<1		PD0166285 is a potent Wee1 and Chk1 inhibitor with activity at nanomolar concentrations (IC50=24 nM for Wee1 and 72 nM for Myt1). PD0166285 is also a novel G2 checkpoint abrogator.	Cell Cycle	C26H27Cl2N5O2
GDC-0326	382.42	PI3K	76	198.734	<1		GDC-0326 is a potent and selective inhibitor of PI3Kα with Ki value of 0.2 nM remarkably selective over the other class I isoforms in enzymatic assays.	PI3K/Akt/mTOR	C19H22N6O3
ON123300	429.52	CDK	29	67.5172	<1		ON123300 is a potent and multi-targeted kinase inhibitor with IC50 of 3.9 nM, 5 nM, 26 nM, 26 nM, 9.2 nM and 11nM for CDK4, Ark5, PDGFRβ, FGFR1, RET, and Fyn, respectively.	Cell Cycle	C24H27N7O
GDC-0084	382.42	PI3K,mTOR	8	20.9194	<1		GDC-0084 is a brain penetrant inhibitor of PI3K and mTOR with Kiapp values of 2 nM, 46 nM, 3 nM, 10 nM and 70 nM for PI3Kα, PI3Kβ, PI3Kδ, PI3Kγ and mTOR.	PI3K/Akt/mTOR	C18H22N8O2
ONO-4059 (GS-4059) hydrochloride	490.94	BTK	98	199.617	<1		ONO-4059 (GS-4059) is highly potent and selective BTK inhibitor with an IC50 of 2.2 nM.	Angiogenesis	C25H23ClN6O3
AMG 337	463.46	c-Met	95	204.98	<1		AMG 337 is an oral, small molecule, ATP-competitive, highly selective inhibitor of the MET receptor with an IC50 of 1 nM.	Protein Tyrosine Kinase	C23H22FN7O3
GSK481	377.39	TNF-alpha	75	198.733	<1		GSK481 is a RIP1(Receptor Interacting Protein Kinase1) inhibitor. Inhibition of RIP1 has been shown to hinder cell necrotic death.	Apoptosis	C21H19N3O4
VO-Ohpic trihydrate	415.2	PTEN	72	173.41	<1		VO-Ohpic is a potent inhibitor of PTEN (phosphatase and tensin homolog) with IC50 of 35 nM.	Others	C12H15N2O11V
BFH772	439.39	VEGFR	87	198.002	<1		BFH772 is a novel potent oral VEGFR2 inhibitor, targeting VEGFR2 kinase with IC50 of 3 nM.	Angiogenesis	C23H16F3N3O3
BAW2881 (NVP-BAW2881)	424.38	VEGFR,Raf,c-RET	84	197.936	<1		BAW2881 (NVP-BAW2881) is a novel vascular endothelial growth factor (VEGF) receptor tyrosine-kinase inhibitor that potently inhibits VEGFR1-3 at 1.0-4.3 nanomolar (nM) concentrations and inhibits PDGFRβ, c-Kit, and RET at 45-72 nM concentrations.	Protein Tyrosine Kinase	C22H15F3N4O2
umbralisib (TGR-1202)	571.55	PI3K	100	174.963	<1		TGR-1202, a novel, next generation PI3Kδ inhibitor, inhibits PI3Kδ activity in enzyme and cell based assays with IC50 and EC50 values of 22.2 & 24.3 nM, respectively.	PI3K/Akt/mTOR	C31H24F3N5O3
Oclacitinib?maleate	453.51	JAK	90	198.452	18	39.6904	Oclacitinib(PF 03394197) is a novel inhibitor of JAK family members with IC50 ranging from 10 to 99 nM and JAK1-dependent cytokines with IC50 ranging from 36 to 249 nM. It does not inhibit a panel of 38 non-JAK kinases.	JAK/STAT	C19H27N5O6S
BI-78D3	379.37	JNK	100	263.595	<1		BI-78D3 is a competitive JNK inhibitor with IC50 of 280 nM that displays > 100 fold selectivity over p38α and no activity at mTOR and PI-3K.	MAPK	C13H9N5O5S2
PF-06447475	305.33	LRRK2	61	199.784	<1		PF-06447475 is a potent, selective, and brain penetrant LRRK2 kinase inhibitor with IC50 of 3 nM.	Autophagy	C17H15N5O
Hydroxyfasudil (HA-1100) HCl	343.83	ROCK	68	197.772	60	174.505	Hydroxyfasudil (HA-1100), an active metabolite of fasudil hydrochloride, is a specific Rho-kinase(ROCK) inhibitor with IC50 values of 0.73 μM and 0.72 μM for ROCK1 and ROCK2, respectively.	Cell Cycle	C14H18ClN3O3RS
BAY 1217389	561.5	Kinesin,Serine/threonin kinase	100	178.094	<1		BAY 1217389 is an orally bioavailable, selective inhibitor of the serine/threonine kinase monopolar spindle 1 (Mps1) with IC50 values below 10 nmol/L while showing an excellent selectivity profile.	Cytoskeletal Signaling	C27H24F5N5O3
NT157	412.26	IGF-1R	82	198.904	<1		NT157, a selective inhibitor of IRS-1/2(insulin receptor substrate), has the potential to inhibit IGF-1R and STAT3 signaling pathways in cancer cells and stroma cells of TME leading to a decrease in cancer cell survival.	Protein Tyrosine Kinase	C16H14BrNO5S
IC261	311.33	Casein Kinase	62	199.146	<1		IC261 is a novel inhibitor of CK1. The IC50 of IC261 for CK1 is 16 μM and for Cdk5 is 4.5 mM.	Metabolism	C18H17NO4
EAI045	383.4	EGFR	76	198.226	<1		EAI045 is an allosteric inhibitor that targets selected drug-resistant EGFR mutants but spares the wild-type receptor.	Protein Tyrosine Kinase	C19H14FN3O3S
Necrosulfonamide	461.47	Others	92	199.363	<1		Necrosulfonamide is a very specific and potent necrosis inhibitor and blocks mixed lineage kinase domain-like protein (MLKL).	Others	C18H15N5O6S2
CCT245737	379.34	Chk	75	197.712	<1		CCT245737 is an orally active CHK1 inhibitor with The IC50 of 1.4 nM. It exhibits >1,000-fold selectivity against CHK2 and CDK1.	Cell Cycle	C16H16F3N7O
GSK583	398.45	NF-κB	79	198.268	<1		GSK583 is a highly potent and selective inhibitor of RIP2 kinase with an IC50 of 5 nM.	NF-κB	C20H19FN4O2S
XMD8-87	445.52	ACK	65	145.897	<1		XMD8-87 is a novel tyrosine kinase nonreceptor 2(TNK2) inhibitor with IC50s of 38 nmol/L and 113 nmol/L for the D163E and R806Q mutations.	Protein Tyrosine Kinase	C24H27N7O2
XMD16-5	416.48	ACK	83	199.289	<1		XMD16-5 is a novel tyrosine kinase nonreceptor 2(TNK2) inhibitor with IC50s of 16 nmol/L and 77 nmol/L for the D163E and R806Q mutations.	Protein Tyrosine Kinase	C23H24N6O2
STO-609	314.29	CaMK	8	25.4542	<1		STO-609 is a specific inhibitor of the Ca2+/Calmodulin-dependent protein kinase kinase(CaM-KK) that inhibits the activities of recombinant CaM-KKα and CaM-KKβ isoforms, with Ki values of 80 and 15 ng/ml, respectively, and also inhibits their autophosphorylation activities.	Neuronal Signaling	C19H10N2O3
eFT-508 (eFT508)	340.38	MNK	13	38.1926	<1		eFT-508 (eFT508) is a potent and selective MNK1/2 inhibitor with IC50s of 2.4 nM and 1 nM, respectively. It potentially results in decreased tumor cell proliferation and tumor growth.	MAPK	C17H20N6O2
NQDI-1	319.31	ASK	21	65.7668	<1		NQDI 1, an inhibitor of ASK1(apoptosis signal-regulating kinase 1), attenuates acute ischemic renal injury by modulating oxidative stress and cell death.	Apoptosis	C19H13NO4
Selonsertib (GS-4997)	445.49	ASK	36	80.8099	<1		GS-4997 is a highly selective and potent once-daily oral ASK1 inhibitor with potential anti-inflammatory, antineoplastic and anti-fibrotic activities.	Apoptosis	C24H24FN7O
Olmutinib (HM61713, BI 1482694)	486.59	EGFR,BTK	97	199.346	<1		Olmutinib is a novel third-generation epidermal growth factor receptor (EGFR) mutation-specific tyrosine kinase inhibitor (TKI). Also a potent inhibitor of Bruton's tyrosine kinase.	Protein Tyrosine Kinase	C26H26N6O2S
CZ415	459.56	mTOR	91	198.015	<1		CZ415, a potent ATP-competitive mTOR inhibitor with very good cell permeability.	PI3K/Akt/mTOR	C22H29N5O4S
LY3023414	406.48	mTOR,PI3K,DNA-PK	47	115.627	<1		LY3023414 is an oral ATP competitive inhibitor of the class I PI3K isoforms, mTOR and DNA-PK.	PI3K/Akt/mTOR	C23H26N4O3
IPI-549	528.56	PI3K	100	189.193	<1		IPI-549 is a potent inhibitor of PI3K-γ with >100-fold selectivity over other lipid and protein kinases. The biochemical IC50 for PI3K-γ is 16 nM.	PI3K/Akt/mTOR	C30H24N8O2
Miransertib (ARQ 092) HCl	468.98	Akt	75	159.922	<1		ARQ 092 is a novel, orally bioavailable and selective AKT pathway inhibitor exhibiting a manageable safety profile among patients with advanced solid tumors.	PI3K/Akt/mTOR	C27H25ClN6
BMS-935177	502.56	BTK,Trk receptor,c-RET	100	198.981	<1		BMS-935177 is a potent, reversible Bruton's Tyrosine Kinase (BTK) inhibitor with an IC50 value of 2.8 nM and demonstrates good kinase selectivity. It is more potent against BTK than other kinase, including the other Tec family kinases (TEC, BMX, ITK, and TXK) over which the compound is between 5- and 67-fold selective.	Angiogenesis	C31H26N4O3
APS-2-79 HCl	423.89	MEK	97	228.833	<1		APS-2-79 is a MAPK antagonist that modulating KSR-dependent MAPK signalling by antagonizing RAF heterodimerization as well as the conformational changes required for phosphorylation and activation of KSR-bound MEK. IC50=120 ± 23 nM.	MAPK	C23H22ClN3O3
WNK463	463.46	Serine/threonin kinase	92	198.507	<1		WNK463 is a pan-WNK-kinase inhibitor. It potently inhibits the in vitro kinase activity of all four WNK family members (WNK1, WNK2, WNK3, and WNK4).	Apoptosis	C21H24F3N7O2
Irbinitinib (ARRY-380, ONT-380)	480.52	HER2	96	199.784	<1		ARRY-380 (ONT-380) is an oral, potent, selective, reversible and ATP-competitive small-molecule inhibitor of ErbB-2 (also called HER2) with IC50s of 8 nM and 7 nM for ErbB-2 and p95 HER2, respectively in cell-based assays, showing ~500-fold selective for HER2 vs EGFR. It has potential antineoplastic activity.	Protein Tyrosine Kinase	C26H24N8O2
CRT0066101	411.33	Serine/threonin kinase,CaMK	25	60.7785	82	199.353	CRT0066101 is a small molecule PKD family specific inhibitor which specifically blocks PKD1/2 activity and does not suppress PKCα/PKCβ/PKCε activity in multiple.	Apoptosis	C18H24Cl2N6O
YU238259	459.95	DNA-PK	91	197.848	<1		YU238259 is a novel inhibitor of homology-dependent DNA repair(HDR), but does not inhibit non-homologous end-joining (NHEJ), in cell-based GFP reporter assays.	DNA Damage	C22H22ClN3O4S
MSC2530818	340.81	CDK	68	199.525	<1		MSC2530818, a CDK8 inhibitor with the IC50 of 2.6 nM, displays excellent kinase selectivity, biochemical and cellular potency, microsomal stability, and is orally bioavailable.	Cell Cycle	C18H17ClN4O
ML-7 HCl	452.74	Serine/threonin kinase	90	198.79	<1		ML-7 is an inhibitor of smooth muscle myosin light chain kinase (MLCK) with a Ki value of 0.3 ?M and displays reversible, ATP-competitive inhibition of Ca2+-calmodulin-dependent and -independent smooth muscle MLCKs.	Apoptosis	C15H18ClIN2O2S
NCB-0846	375.42	Wnt/beta-catenin	75	199.776	<1		NCB-0846 is a novel, orally small-molecule Wnt inhibitor that inhibits TNIK (TRAF2 and NCK-Interacting Kinase) with an IC50 value of 21 nM.	Stem Cells & Wnt	C21H21N5O2
Erdafitinib (JNJ-42756493)	446.54	FGFR	89	199.31	<1		Erdafitinib (JNJ-42756493) is a potent and selective orally bioavailable, pan fibroblast growth factor receptor (FGFR) inhibitor with potential antineoplastic activity.	Angiogenesis	C25H30N6O2
S49076	438.5	c-Met,FGFR,TAM Receptor	87	198.404	<1		S49076 is a novel, potent inhibitor of MET, AXL/MER, and FGFR1/2/3 with IC50 values below 20 nmol/L.	Protein Tyrosine Kinase	C22H22N4O4S
PF-06273340	479.92	Trk receptor	95	197.95	<1		PF-06273340 is a highly potent, kinases elective, well-tolerated pan-Trk inhibitor with IC50 values of 6, 4, 3 nM for TrkA, TrkB, Trk C, respectively.	Protein Tyrosine Kinase	C23H22ClN7O3
Naquotinib(ASP8273)	562.71	EGFR	52	92.4099	<1		Naquotinib(ASP8273) is an orally available, irreversible, mutant-selective, epidermal growth factor receptor (EGFR) inhibitor, with potential antineoplastic activity.	Angiogenesis	C30H42N8O3
LTURM34	414.48	DNA-PK	82	197.838	<1		LTURM34 is a specific DNA-PK inhibitor, 170-fold more selective for DNA-PK activity compared to PI3K activity, with IC50 value of 0.034 μM.	DNA Damage	C24H18N2O3S
KPT-9274	610.62	NAMPT,PAK	100	163.768	<1		KPT-9274 is an orally bioavailable small molecule that is a non-competitive dual inhibitor of PAK4 and NAMPT. It shows an IC50 of ~120 nM for NAMPT in a cell-free enzymatic assay.	Metabolism	C35H29F3N4O3
ZINC00881524 (ROCK inhibitor)	380.46	ROCK	76	199.758	<1		ZINC00881524 is a ROCK inhibitor.	Cell Cycle	C21H20N2O3S
VPS34 inhibitor 1 (Compound 19, PIK-III analogue)	391.47	PI3K	78	199.249	<1		VPS34 inhibitor 1 (Compound 19, PIK-III analogue) is a potent and selective inhibitor of VPS34 with an IC50 of 15 nM.	PI3K/Akt/mTOR	C21H25N7O
UK-371804 HCl	422.29	Serine Protease	30	71.0412	<1		UK-371804 is a potent and selective urokinase-type plasmogen activator (uPA) inhibitor with excellent enzyme potency (Ki=10 nM) and selectivity profile (4000-fold versus tPA and 2700-fold versus plasmin).	Proteases	C14H17Cl2N5O4S
GSK'872 (GSK2399872A)	383.49	Serine/threonin kinase	76	198.18	<1		GSK'872 (GSK2399872A) is a potent and selective RIP3 kinase inhibitor which binds RIP3 kinase domain with high affinity (IC50=1.8 nM) and inhibits kinase activity with IC50 of 1.3 nM. It has minimal cross-reactivity.	Apoptosis	C19H17N3O2S2
GSK2982772	377.4	TNF-alpha,NF-κB	75	198.728	<1		GSK2982772 is an ATP competitive receptor-interacting protein-1 (RIP1) kinase inhibitor with the IC50 value of 1 nM. It has exquisite kinase specificity and excellent activity in blocking many TNF-dependent cellular responses.	Apoptosis	C20H19N5O3
GSK180736A (GSK180736)	365.36	ROCK	73	199.803	<1		GSK180736A, developed as a Rho-associated, coiled-coil-containing protein kinase inhibitor, binds to GRK2(G protein-coupled receptor kinase 2) with logIC50 pf -6.6 (logIC50 -4.0 for GRK5 and >-3 for GRK1) ≥400-fold selective for GRK2 over both GRK1 and GRK5.	Cell Cycle	C19H16FN5O2
Tanzisertib(CC-930)	484.9	JNK	89	183.543	4	8.24912	CC-930 is kinetically competitive with ATP in the JNK-dependent phosphorylation of the protein substrate c-Jun and potent against all isoforms of JNK (Ki(JNK1) = 44 ± 3 nM, IC50(JNK1) = 61 nM, Ki(JNK2) = 6.2 ± 0.6 nM, IC50(JNK2) = 5 nM, IC50(JNK3) = 5 nM) and selective against MAP kinases ERK1 and p38a with IC50 of 0.48 and 3.4 μM respectively.	MAPK	C21H24ClF3N6O2
PD-166866 (PD166866)	396.44	FGFR	14	35.3143	<1		PD-166866 is a synthetic molecule inhibiting the tyrosin kinase action of FGFR1, shows a very high selectivity towards FGFR1 and inhibits the auto-phosphorylation activity of FGRF1.	Angiogenesis	C20H24N6O3
BLU-554 (BLU554)	503.38	FGFR	100	198.657	<1		BLU-554 is a potent, highly-selective, oral FGFR4 inhibitor with an IC50 value of 5 nM. The IC50s for FGFR1-3 is 624-2203 nM.	Angiogenesis	C24H24Cl2N4O4
Belizatinib (TSR-011)	577.73	ALK,Trk receptor	100	173.091	<1		Belizatinib (TSR-011) is a potent inhibitor of ALK (IC50=0.7 nM) and tropomyosin receptor kinase (TRK) (IC50 values less than 3 nM for TRK A, B, and C).	Protein Tyrosine Kinase	C33H44FN5O3
AD80	473.43	c-RET,Src,S6 Kinase	94	198.551	<1		AD80, a multikinase inhibitor, shows strong activity against human RET, BRAF, S6K, and SRC but were much less active than either AD57 or AD58 against mTOR. The IC50 value for RET is 4 nM.	Protein Tyrosine Kinase	C22H19F4N7O
Senexin A	274.32	CDK	54	196.85	<1		Senexin A is a potent and selective inhibitor of CDK8 and its nearest relative, CDK19 with Kd values of 0.83 μM and 0.31 μM for CDK8 and CDK19 ATP site binding, respectively.	Cell Cycle	C17H14N4
GSK2256098	414.89	FAK	82	197.643	<1		GSK2256098 is a potent, selective, reversible, and ATP competitive FAK kinase inhibitor with apparent Ki of 0.4 nM.	Angiogenesis	C20H23ClN6O2
GDC-0575 (ARRY-575, RG7741)	378.27	Chk	75	198.271	<1		GDC-0575 (ARRY-575, RG7741) is a potent and selective <b>CHK1</b> inhibitor with an IC50 of 1.2 nM.	Cell Cycle	C16H20BrN5O
LY3214996	453.56	ERK	27	59.5291	<1		LY3214996 is a selective and novel ERK1/2 inhibitor with IC50 of 5 nM for both enzymes in biochemical assays. It potently inhibits cellular phospho-RSK1 in BRAF and RAS mutant cancer cell lines.	MAPK	C22H27N7O2S
PF-06651600	285.34	JAK	57	199.762			PF-06651600 is a potent and irreversible JAK3-selective inhibitor with an IC50 of 33.1 nM but without activity (IC50 > 10 000 nM) against JAK1, JAK2, and TYK2.	JAK/STAT	C15H19N5O
FM-381	428.49	JAK	20	46.6755	<1		FM-381 is a JAK3 specific reversible covalent inhibitor with IC50 of 127 pM for JAK3 and demonstrates 400-, 2,700- and 3,600-fold selectivity over JAK1, JAK2, and TYK2, respectively.	JAK/STAT	C24H24N6O2
Btk inhibitor 2	431.49	BTK	86	199.309	<1		Btk inhibitor 2 is a BTK inhibitor.	Angiogenesis	C24H25N5O3
Asciminib (ABL001)	449.84	Bcr-Abl	89	197.848			Asciminib(ABL001) is a potent and selective allosteric ABL1 inhibitor with dissociation constant (Kd) of?0.5-0.8?nM and selectivity to the myristoyl pocket of ABL1.	Angiogenesis	C20H18ClF2N5O3
AZ31	420.5	ATM/ATR	53	126.04	<1		AZ31 is a selective and novel <b>ATM</b> inhibitor with an IC50 of <0.0012 μM. It shows excellent selectivity over closely related enzymes (>500 fold selective over DNA-PK and PI3Kα and >1000 fold selective over mTOR, PI3Kβ and PI3Kγ).	DNA Damage	C24H28N4O3
Seletalisib (UCB-5857)	482.85	PI3K	97	200.891	<1		Seletalisib is a novel small-molecule inhibitor of <b>PI3Kδ</b> with an IC50 value of 12 nM and shows significant selectivity to PI3Kδ with respect to the other class I PI3K isoforms (between 24- and 303-fold).	PI3K/Akt/mTOR	C23H14ClF3N6O
CA-4948	417.42	TLR,IL Receptor	30	71.8701	<1		CA-4948 is a reversible kinase inhibitor that modulates IRAK4 function in both the toll-like receptor (TLR) and interleukin 1 receptor (IL-1R) signaling cascades, and demonstrates pharmacodynamic and antitumor activity in in vitro and in vivo nonclinical models.	Immunology & Inflammation	C21H19N7O3
RXDX-106 (CEP-40783)	588.56	TAM Receptor	10	16.9906	<1		RXDX-106 (CEP-40783) is an orally-available, potent and selective TAM(TYRO3, AXL, MER)/MET inhibitor displaying low nanomolar biochemical activity and slow (T1/2 >120 min) inhibitor off-rate in peptide phosphorylation assays and in vitro kinase binding assays, respectively.	Protein Tyrosine Kinase	C31H26F2N4O6
Amcasertib (BBI503)	539.69	Stemness kinase	14	25.9408	<1		Amcasertib (BBI503), a first-in-class cancer stemness kinase inhibitor, is claimed to inhibit Nanog and other CSC pathways by targeting kinases with potential anticancer activity.	Stem Cells & Wnt	C31H33N5O2S
Sitravatinib (MGCD516)	629.68	Ephrin receptor,c-Kit,TAM Receptor,VEGFR,Trk receptor	100	158.811	<1		Sitravatinib (MGCD516) is a novel small molecule inhibitor targeting multiple RTKs involved in driving sarcoma cell growth, including c-Kit, PDGFRβ, PDGFRα, c-Met, and Axl.	Protein Tyrosine Kinase	C33H29F2N5O4S
PRN1371	561.46	FGFR	100	178.107	<1		PRN1371 is an irreversible covalent FGFR1-4 kinase inhibitor, with IC50s of 0.6, 1.3, 4.1, 19.3 and 8.1 nM for FGFR1, 2, 3, 4 and CSF1R, respectively.	Angiogenesis	C26H30Cl2N6O4
Serabelisib (INK-1117,MLN-1117,TAK-117)	363.37	PI3K	16	44.0323	<1		Serabelisib (INK-1117,MLN-1117,TAK-117) is a potent and selective oral PI3Kα isoform inhibitor (IC50 of 21 nmol/L against PI3Kα) that has demonstrated > 100-fold selectivity relative to other class I PI3K family members (PI3Kβ/γ/δ) and mTOR, and a high degree of selectivity against many other kinase.	PI3K/Akt/mTOR	C19H17N5O3
TPX-0005	355.37	Src,ALK	70	196.978	<1		TPX-0005 is a novel ALK/ROS1/TRK inhibitor with the IC50 values of 1.01 nM for WT ALK, 1.26 nM for ALK(G1202R), and 1.08 nM for ALK(L1196M) also a potent SRC inhibitor (IC50 5.3 nM).	Protein Tyrosine Kinase	C18H18FN5O2
SF2523	371.41	PI3K,DNA-PK,Epigenetic Reader Domain,mTOR	29	78.0808	<1		SF2523 is a highly selective and potent inhibitor of PI3K with IC50 values of 34 nM, 158 nM, 9 nM, 241 nM and 280 nM for PI3Kα, PI3Kγ, DNA-PK, BRD4 and mTOR, respectively.	PI3K/Akt/mTOR	C19H17NO5S
Autophinib	346.73	Autophagy,PI3K	69	199.002	<1		Autophinib is a potent autophagy inhibitor with a novel chemotype with IC50 values of 90 and 40 nM for autophagy in starvation induced autophagy assay and rapamycin induced autophagy assay. The IC50 value for Vps34 is 19 nM in vitro.	Autophagy	C14H11ClN6O3
Derazantinib(ARQ-087)	468.57	FGFR	93	198.476	<1		Derazantinib(ARQ-087) is an orally bioavailable inhibitor of the <b>fibroblast growth factor receptor (FGFR)</b> with IC50 values of 1.8 nM for FGFR2, and 4.5 nM for FGFR1 and 3, showing lower potency for FGFR4 (IC50=34 nM). It also inhibits RET, DDR2, PDGFRβ, VEGFR and KIT.	Protein Tyrosine Kinase	C29H29FN4O
Sodium dichloroacetate (DCA)	150.92	Dehydrogenase	30	198.781	30	198.781	Dichloroacetate, a specific inhibitor of pyruvate dehydrogenase kinase (PDK) with IC50 values of 183 and 80 μM for PDK2 and PDK4 respectively, has been shown to derepress a mitochondrial potassium-ion channel axis, trigger apoptosis in cancer cells, and inhibit tumor growth.	Metabolism	C2HCl2NaO2
PKM2 inhibitor(compound 3k)	345.48	PKM	6	17.3671	<1		PKM2 inhibitor(Compound 3K) displays PKM2 inhibitory activity with the IC50 value of 2.95 μM. The IC50 value for PKM1 is 4-5-fold higher than that for PKM2.	Metabolism	C18H19NO2S2
Chk2 Inhibitor II (BML-277)	363.8	Chk	72	197.911	<1		Chk2 Inhibitor II (BML-277) is an ATP-competitive inhibitor of Chk2 with IC50 of 15 nM. It is 1000-fold more selective toward Chk2 serine/threonine kinase than for Chk1 and Cdk1/B kinases.	Cell Cycle	C20H14ClN3O2
Nec-1s (7-Cl-O-Nec1)	277.71	TNF-alpha	56	201.649	<1		Nec-1s is a stable variant of Necrostatin-1. It is a more specific <b>RIPK1</b> inhibitor lacking the IDO-targeting effect, with >1000-fold more selective for RIPK1 than for any other kinase out of 485 human kinases.	Apoptosis	C13H12ClN3O2
GSK'963	230.31	NF-κB,TNF-alpha	46	199.731	<1		GSK'963 is a chiral small-molecule inhibitor of RIP1 kinase with an IC50 of 29 nM in FP binding assays. It is >10 000-fold selective for RIP1 over 339 other kinases.	NF-κB	C14H18N2O
kira6	518.53	Others	60	115.712	<1		kira6 is a potent type II IRE1α kinase inhibitor with an IC50 of 0.6 μM. It dose-dependently inhibits IRE1α(WT) kinase activity, XBP1 RNA cleavage, Ins2 RNA cleavage and oligomerization.	Others	C28H25F3N6O
Takinib	322.36	IL Receptor	64	198.536	<1		Takinib is a potent and selective TAK1 inhibitor with an IC50 of 9.5 nM, more than 1.5 log more potent than the second and third ranked targets, IRAK4 (120 nM) and IRAK1 (390 nM), respectively.	Immunology & Inflammation	C18H18N4O2
BAY 1895344 (BAY-1895344)	411.89	ATM/ATR	82	199.082	82	199.082	BAY 1895344 is a potent, highly selective and orally available ATR inhibitor with an IC50 of 7 nM.	DNA Damage	C20H22ClN7O
Tenalisib (RP6530)	415.42	PI3K	75	180.54	<1		Tenalisib (RP6530) is a potent and selective dual PI3Kδ/γ inhibitor with IC50 values of 24.5 nM and 33.2 nM for PI3Kδ and PI3Kγ, respectively. Its selectivity over α and β isoforms are more than 300-fold and 100-fold, respectively.	PI3K/Akt/mTOR	C23H18FN5O2
H3B-6527	629.54	FGFR	50	79.4231	<1		H3B-6527 is a highly selective covalent FGFR4 inhibitor with an IC50 value of <1.2 nM and at least 250-fold selectivity over FGFR1-3 (IC50 values of 320, 1,290 and 1,060 nM respectively).	Protein Tyrosine Kinase	C29H34Cl2N8O4
BTK inhibitor 1 (Compound 27)	474.49	BTK	95	200.215	<1		BTK inhibitor 1 (compound 27) is an inhibitor of <b>BTK</b> with an IC50 of 0.11 nM for Btk and inhibits B cell activation in hWB with an IC50 of 2 nM.	Angiogenesis	C24H23FN8O2
AZD1390	477.57	ATM/ATR	14	29.3151	<1		AZD1390 is a first-in-class orally available and CNS penetrant ATM inhibitor with an IC50 of 0.78 nM in cells and >10,000-fold selectivity over closely related members of the PIKK family of enzymes and excellent selectivity across a broad panel of kinases.	PI3K/Akt/mTOR	C27H32FN5O2
RAF709	542.55	Raf	100	184.315	<1		RAF709 is a potent inhibitor of B/C RAF kinase with almost equivalent IC50 values of 0.4 nM for B-RAF and C-RAF, showing a high level of selectivity, demonstrating greater than 99% on-target binding to BRAF, BRAFV600E, and CRAF at 1 μM and very few off-targets with DDR1 (>99%), DDR2 (86%), FRK (92%), and PDGFRb (96%), the only kinases with binding >80% at 1 μM.	MAPK	C28H29F3N4O4
2-D08	270.24	c-RET,SUMO,TAM Receptor,IL Receptor,PI3K,VEGFR,GSK-3	54	199.822	<1		2-D08 is a cell permeable, mechanistically unique inhibitor of protein sumoylation. It is also inhibits Axl, IRAK4, ROS1, MLK4, GSK3β, RET, KDR and PI3Kα with IC50 values of 0.49, 3.9, 5.3, 9.8, 11, 11, 17 and 35 nM respectively in biochemical assays.	Ubiquitin	C15H10O5
SNS-314 Mesylate	430.93	Aurora Kinase	100	232.056	<1		SNS-314 Mesylate is a potent and selective inhibitor of Aurora A, Aurora B and Aurora C with IC50 of 9 nM, 31 nM, and 3 nM, respectively and less potent to Trk A/B, Flt4, Fms, Axl, c-Raf and DDR2.	Cell Cycle	C18H15ClN6OS2
TP0427736 HCl	334.85	ALK	67	200.09	<1		TP0427736 is a potent inhibitor of <b>ALK5 kinase activity</b> with an <b>IC50</b> of 2.72 nM and this effect is 300-fold higher than the inhibitory effect on ALK3 (IC50 = 836 nM for ALK3). It also inhibits Smad2/3 phosphorylation in A549 cells induced by TGF-β1 with an IC50 value of 8.68 nM.	Angiogenesis	C14H11ClN4S2
UM-164	640.68	Src,p38 MAPK	100	156.084	<1		UM-164 is a highly potent, dual c-Src/p38inhibitor of c-Src with a binding constant Kd of 2.7 nM for c-Src and inhibits both p38α and p38β.	Protein Tyrosine Kinase	C30H31F3N8O3S
ARQ 531	478.93	BTK	95	198.359	<1		ARQ 531 is a reversible non-covalent inhibitor of Bruton’s Tyrosine Kinase (BTK), with IC50s of 0.85 nM and 0.39 nM for WT BTK and C481S BTK, respectively	Tyrosine-Kinase	C25H23ClN4O4
DCC-2618	489.47	c-Kit	97	198.174	<1		DCC-2618 is an orally bioavailable switch pocket control inhibitor of wild-type and mutated forms of KIT and PDGFR with potential antineoplastic activity. It also inhibits several other kinases, including VEGFR2, TIE2, PDGFR-beta and CSF1R, thereby further inhibiting tumor cell growth.	Protein Tyrosine Kinase	C26H21F2N5O3
ABBV-744	491.55	Epigenetic Reader Do	98	199.369	<1		ABBV-744 is a BDII-selective <b>BET bromodomain</b> inhibitor that inhibits BRD2, BRD3 and BRD4. It is developed for treating AML and cancers.	Epigenetics	C28H30FN3O4
Anlotinib (AL3818) dihydrochloride	480.36	VEGFR	96	199.85	96	199.85	Anlotinib (AL3818) is a highly potent and selective VEGFR2 inhibitor with IC50 less than 1 nM. It has broad-spectrum antitumor potential in clinical trials.	Protein Tyrosine Kinase	C23H24Cl2FN3O3
Atuveciclib (BAY-1143572)	387.43	CDK	77	198.746	<1		Atuveciclib (BAY-1143572) is potent and highly selective <b>PTEFb/CDK9</b> inhibitor with <b>IC50</b> values of 13 nM for CDK9/CycT and the ratio of IC50 values for CDK2/CDK9 is about 100. Outside the CDK family, It inhibits GSK3 kinase with IC50 values of 45 nM and 87 nM for GSK3α and GSK3β respectively.	Cell Cycle	C18H18FN5O2S
AZ32	328.37	ATM/ATR	66	200.993	<1		AZ32 is a specific inhibitor of the <b>ATM kinase</b> that possesses good BBB penetration in mouse with an IC50 value of <0.0062 μM for ATM enzyme. It shows adequate selectivity over ATR and also has high cell permeability.	DNA Damage	C20H16N4O
Bimiralisib (PQR309)	411.38	PI3K	6	14.5851	<1		Bimiralisib (PQR309) is a novel brain-penetrant dual <b>PI3K/mTOR</b> inhibitor with in vitro and in vivo antilymphoma activity. It displays excellent selectivity versus PI3K-related lipid kinases, protein kinases and unrelated targets.	PI3K/Akt/mTOR	C17H20F3N7O2
Avitinib (AC0010)	487.53	EGFR	97	198.962	<1		Avitinib (AC0010) is a pyrrolopyrimidine-based irreversible <b>EGFR</b> inhibitor that is mutation-selective with IC50 value of 0.18 nM against EGFR L858R/T790M double mutations, nearly 43-fold greater potency over wild-type EGFR (IC50 value, 7.68 nM). It has comparable anti-tumor activity and tolerated toxicity.	Protein Tyrosine Kinase	C26H26FN7O2
LXH254	502.49	Raf	100	199.009	<1		LXH254 is a type II ATP-competitive inhibitor that inhibits both <b>B- and CRAF kinase</b> activities at picomolar concentrations with a high degree of selectivity against a panel of 456 human kinases and in cell-based assays.	MAPK	C25H25F3N4O4
leniolisib(CDZ 173)	450.46	PI3K	90	199.796	<1		Leniolisib(CDZ 173) is a potent <b>PI3Kδ</b> selective inhibitor with <b>biochemical IC50 values</b> of 0.244, 0.424, 2.23 and 0.011 μM for PI3Kα, PI3Kβ, PI3Kγ and PI3Kδ, respectively.	PI3K/Akt/mTOR	C21H25F3N6O2
Alofanib(RPT835)	413.4	FGFR	83	200.774	<1		Alofanib(RPT835) is a novel selective allosteric inhibitor of <b>FGFR2</b> and has a dramatic inhibitory effect with IC50 <10 nM on FGF2-induced phoshphorylation of FRS2a in KATO III cells. It has no direct effect on FGF2-dependent FGFR1 and FGFR3 phosphorylation levels in either cell lines and no effects on FGF2-FGFR2 binding.	Angiogenesis	C19H15N3O6S
Ripretinib (DCC-2618)	510.36	c-Kit	100	195.94	<1		DCC-2618 is an orally bioavailable switch pocket control inhibitor of wild-type and mutated forms of the tumor-associated antigens (TAA) mast/stem cell factor receptor (SCFR) <b>KIT</b> and <b>PDGFR-alpha</b>, with IC50 values of 4 nM, 8 nM, 18 nM, 5 nM and 14 nM for WT KIT, V654A KIT, T670I KIT, D816H KIT and D816V KIT, respectively.	Protein Tyrosine Kinase	C24H21BrFN5O2
HS-1371	384.47	Serine/threonin kina	13	33.8128	<1		HS-1371 is a potent <b>RIP3 kinase</b> inhibitor with an IC50 of 20.8 nM. It binds to the ATP binding pocket of RIP3 and inhibits ATP binding to prevent RIP3 enzymatic activity in vitro.	Apoptosis	C24H24N4O
Evobrutinib	429.51	BTK	86	200.228	<1		Evobrutinib is a highly selective <b>BTK</b> inhibitor with an IC50 of 37.9 nM. It has potential anti-neoplastic activity.	Protein Tyrosine Kinase	C25H27N5O2
CC-90003	458.44	ERK	92	200.681	<1		CC-90003 is an irreversible inhibitor of <b>ERK1/2</b> with IC50s in the 10-20 nM range and shows good kinase selectivity in a 258-kinase biochemical assay.	MAPK	C22H21F3N6O2
Gambogenic acid	630.767	Others	10	15.8537			Gambogenic acid induces mitochondria-dependent apoptosis and increases P53 expression in human gastric carcinoma cell line. Gambogenic acid suppresses breast cancer MDA-MB-231 cell growth by mediating apoptosis through death receptor and mitochondrial pathways in vivo and in vitro. Gambogenic acid can cause aberrant autophagy to induce cell death and may suggest the potential application of Gambo…	apoptosis	C38H46O8
Wedelolactone	314.246	NF-κB	63	200.48			Wedelolactone inhibits NF-κB-mediated gene transcription in cells by blocking the phosphorylation and degradation of IκBα.	Cancer	C16H10O7
Magnolin	416.464	ERK1	83	199.297			Magnolin reduces the renal oxidative stress, suppresses caspase-3 activity, and increases Bcl-2 expression in vivo and in vitro. Magnolin has anti-inflammatory and antioxidative effects.	Cancer	C23H28O7
Picfeltarraenin IA	762.923	AChE	100	131.075			Picfeltarraenin IA, IB, IV, X, XI are stronger AChE inhibitions than the known AChE inhibitor Tacrine. Picfeltarraenin IA and IB are potential PI3K and epidermal growth factor receptor (EGFR ) inhibitors, EGFR plays a critical role in the initiation and progr ession of a variety of human cancers, including breast cancer. Picfeltarraenin IA has anti-inflammatory activity, it can inhibit lipopolysa…	AChE inhibitor	C41H62O13
Berbamine	608.723	Others	100	164.278			Berbamine has high binding affinity toward the (GGA)8 G-quadruplex. Berbamine and its derivatives are promising agents to suppress liver cancer growth by targeting CAMKII. Berbamine may be the first ATP-competitive inhibitor of CaMKII γ, could be as a new type of molecular targeted agent through inhibition of the CaMKII γ activity for treatment of leukemia. Berbamine can enhance the antitumor act…	Others	C37H40N2O6
Corynoxeine	382.453	ERK1/2	76	198.717			Corynoxeine is a potent ERK1/2 inhibitor of key PDGF-BB-induced VSMC proliferation and may be useful in the prevention and treatment of vascular diseases and restenosis after angioplasty.	ERK	C22H26N2O4
Cyasterone	520.655	EGFR	100	192.066			Cyasterone, a natural EGFR inhibitor, can inhibit the growth of A549 and MGC823 cells, via regulating EGFR signaling pathway, it may be a promising anti-cancer agent. Cyasterone has antifeeding activity.	Cancer	C29H44O8
Isorhamnetin 3-O-neohesperoside	624.54	Others	100	160.118	-1		Isorhamnetin 3-O-neohesperoside is the major active substance of Puhuang, a traditional herb medicine widely used in clinical practice to tackle many chronic diseases. It has signiﬁcant biological and pharmacological activities, including antioxidant, antiatherogenic and antimicrobial effects.	Others	C28H32O16
Perifosine (KRX-0401)	461.66	Akt	<1		8	17.3288	Perifosine (KRX-0401) is a novel Akt inhibitor with IC50 of 4.7 μM in MM.1S cells, targets pleckstrin homology domain of Akt. Phase 3.	PI3K/Akt/mTOR	C25H52NO4P
Palbociclib (PD-0332991) HCl	483.99	CDK	3	6.19848	30	61.9848	Palbociclib (PD-0332991) HCl is a highly selective inhibitor of CDK4/6 with IC50 of 11 nM/16 nM in cell-free assays, respectively. It shows no activity against CDK1/2/5, EGFR, FGFR, PDGFR, InsR, etc. Phase 3.	Cell Cycle	C24H30ClN7O2
Ralimetinib (LY2228820)	612.74	p38 MAPK	4	6.52805	100	163.201	Ralimetinib (LY2228820) is a novel and potent inhibitor of p38 MAPK with IC50 of 7 nM in a cell-free assay, does not alter p38 MAPK activation. Phase 1/2.	MAPK	C26H37FN6O6S2
Palbociclib (PD0332991) Isethionate	573.66	CDK	<1		10	17.4319	Palbociclib (PD0332991) Isethionate is a highly selective inhibitor of CDK4/6 with IC50 of 11 nM/16 nM in cell-free assays. It shows no activity against CDK1/2/5, EGFR, FGFR, PDGFR, InsR, etc. Phase 3.	Cell Cycle	C26H35N7O6S
Miltefosine	407.57	Akt	<1		81	198.739	Miltefosine inhibits PI3K/Akt activity with ED50 of 17.2 μM and 8.1 μM in carcinoma cell lines A431 and HeLa, first oral drug for Visceral leishmaniasis, effective against both promastigotes and amastigotes.	PI3K/Akt/mTOR	C21H46NO4P
Sodium Monofluorophosphate	143.95	phosphatase	<1		29	201.459	Sodium Monofluorophosphate is a competitive inhibitor of pyruvate kinase and alkaline phosphatase with Ki of 3.4 mM and 69 μM, respectively, which also irreversibly inhibits phosphorylase phosphatase with Ki of 0.5 mM.	Others	FNa2O3P
Dorsomorphin (Compound C) 2HCl	472.41	AMPK	<1		94	198.98	Dorsomorphin 2HCl is a potent, reversible, selective AMPK inhibitor with Ki of 109 nM in cell-free assays, exhibiting no significant inhibition of several structurally related kinases including ZAPK, SYK, PKCθ, PKA, and JAK3. Also inhibits type Ⅰ BMP receptor activity.	PI3K/Akt/mTOR	C24H27Cl2N5O
LDN-193189 2HCl	479.4	TGF-beta/Smad	<1		52	108.469	LDN193189 HCl is the hydrochloride salt of LDN193189, which is a selective BMP signaling inhibitor, and inhibits the transcriptional activity of the BMP type I receptors ALK2 and ALK3 with IC50 of 5 nM and 30 nM in C2C12 cell lines, respectively, 200-fold selectivity for BMP versus TGF-β.	TGF-beta/Smad	C25H23ClN6
XL413 (BMS-863233)	326.18	CDK	<1		46	141.026	XL413 (BMS-863233) is a potent and selective cell division cycle 7 homolog (CDC7) kinase inhibitor with IC50 of 3.4 nM, showing 63-, 12- and 35-fold selectivity over CK2, Pim-1 and pMCM2, respectively. Phase 1/2.	Cell Cycle	C14H13Cl2N3O2
TAK-659	380.85	Syk,FLT3	<1		4	10.5028	TAK-659 is a potent and selective inhibitor of spleen tyrosine kinase (SYK) with an IC50 value of 3.2 nM. It is selective against most other kinases, but potent toward both SYK and FLT3.	Angiogenesis	C17H22ClFN6O
bpV (HOpic)	347.24	PTEN	<1		69	198.71	bpV (HOpic) is a potent inhibitor of PTEN with an IC50 of 14 nM. The IC50s for PTP-β and PTP-1B are about 350- and 1800-fold higher than the IC50 for PTEN, respectively.	Others	C6H4K2NO8V
Canertinib (CI-1033)	485.94	EGFR,HER2	2	4.11573	<1		Canertinib (CI-1033) is a pan-ErbB inhibitor for EGFR and ErbB2 with IC50 of 1.5 nM and 9.0 nM, no activity to PDGFR, FGFR, InsR, PKC, or CDK1/2/4. Phase 3.	Protein Tyrosine Kinase	C24H25ClFN5O3
Erlotinib HCl (OSI-744)	429.9	Autophagy,EGFR	4	9.30449	<1		Erlotinib HCl (OSI-744) is an EGFR inhibitor with IC50 of 2 nM in cell-free assays, >1000-fold more sensitive for EGFR than human c-Src or v-Abl.	Protein Tyrosine Kinase	C22H24ClN3O4
Tandutinib (MLN518)	562.7	FLT3	5	8.88573	<1		Tandutinib (MLN518, CT53518) is a potent FLT3 antagonist with IC50 of 0.22 μM, also inhibits PDGFR and c-Kit, 15 to 20-fold higher potency for FLT3 versus CSF-1R and >100-fold selectivity for the same target versus FGFR, EGFR and KDR. Phase 2.	Angiogenesis	C31H42N6O4
Vandetanib (ZD6474)	475.35	VEGFR	4	8.41485	<1		Vandetanib (ZD6474) is a potent inhibitor of VEGFR2 with IC50 of 40 nM in a cell-free assay. It also inhibits VEGFR3 and EGFR with IC50 of 110 nM and 500 nM, respectively. Not sensitive to PDGFRβ, Flt1, Tie-2 and FGFR1 with IC50 of 1.1-3.6 μM. No activity against MEK, CDK2, c-Kit, erbB2, FAK, PDK1, Akt and IGF-1R with IC50 above 10 μM.	Protein Tyrosine Kinase	C22H24BrFN4O2
TAE684 (NVP-TAE684)	614.2	ALK	3	4.8844	<1		TAE684 (NVP-TAE684) is a potent and selective ALK inhibitor with IC50 of 3 nM in a cell-free assay, 100-fold more sensitive for ALK than InsR.	Protein Tyrosine Kinase	C30H40ClN7O3S
SGX-523	359.41	c-Met	3	8.34701	<1		SGX-523 is a selective Met inhibitor with IC50 of 4 nM, no activity to BRAFV599E, c-Raf, Abl and p38α. Phase 1.	Protein Tyrosine Kinase	C18H13N7S
XL147 analogue	448.52	PI3K	3	6.68866	<1		XL147 analogue is a selective and reversible class I PI3K inhibitor for PI3Kα/δ/γ with IC50 of 39 nM/36 nM/23 nM in cell-free assays, less potent to PI3Kβ. Phase 1/2.	PI3K/Akt/mTOR	C21H16N6O2S2
PIK-75 HCl	488.74	DNA-PK,PI3K	4	8.18431	<1		PIK-75 HCl is a p110α inhibitor with IC50 of 5.8 nM (200-fold more potently than p110β), isoform-specific mutants at Ser773, and also potently inhibits DNA-PK with IC50 of 2 nM in cell-free assays.	PI3K/Akt/mTOR	C16H15BrClN5O4S
Ellagic acid	302.19	Topoisomerase	3	9.92753	<1		Ellagic acid has antiproliferative and antioxidant property.	DNA Damage	C14H6O8
GSK1059615	333.36	mTOR,PI3K	2	5.99952	<1		GSK1059615 is a dual inhibitor of PI3Kα/β/δ/γ (reversible) and mTOR with IC50 of 0.4 nM/0.6 nM/2 nM/5 nM and 12 nM, respectively. Phase 1.	PI3K/Akt/mTOR	C18H11N3O2S
CCT129202	497.02	Aurora Kinase	3	6.03597	<1		CCT129202 is an ATP-competitive pan-Aurora inhibitor for Aurora A, Aurora B and Aurora C with IC50 of 0.042 μM, 0.198 μM and 0.227 μM, respectively. It is less potent to FGFR3, GSK3β, PDGFRβ, etc.	Cell Cycle	C23H25ClN8OS
Neratinib (HKI-272)	557.04	EGFR,HER2	5	8.97602	<1		Neratinib (HKI-272) is a highly selective HER2 and EGFR inhibitor with IC50 of 59 nM and 92 nM in cell-free assays weakly inhibits KDR and Src, no significant inhibition to Akt, CDK1/2/4, IKK-2, MK-2, PDK1, c-Raf and c-Met. Phase 3.	Protein Tyrosine Kinase	C30H29ClN6O3
R788 (Fostamatinib) Disodium	624.42	Syk	6	9.60892	<1		R788 (Fostamatinib) disodium, a prodrug of the active metabolite R406, is a Syk inhibitor with IC50 of 41 nM in a cell-free assay, strongly inhibits Syk but not Lyn, 5-fold less potent to Flt3. Phase 3.	Angiogenesis	C23H24FN6Na2O9P
Gedatolisib (PF-05212384, PKI-587)	615.73	mTOR,PI3K	2	3.24818	<1		Gedatolisib (PF-05212384, PKI-587) is a highly potent dual inhibitor of PI3Kα, PI3Kγ and mTOR with IC50 of 0.4 nM, 5.4 nM and 1.6 nM in cell-free assays, respectively. Phase 2.	PI3K/Akt/mTOR	C32H41N9O4
NU7441 (KU-57788)	413.49	DNA-PK,PI3K	4	9.67375	<1		NU7441 (KU-57788) is a highly potent and selective DNA-PK inhibitor with IC50 of 14 nM and also inhibits PI3K with IC50 of 5 μM in cell-free assays.	DNA Damage	C25H19NO3S
LY2109761	441.52	TGF-beta/Smad	2	4.52981	<1		LY2109761 is a novel selective TGF-β receptor type I/II (TβRI/II) dual inhibitor with Ki of 38 nM and 300 nM in a cell-free assay, respectively shown to negatively affect the phosphorylation of Smad2.	TGF-beta/Smad	C26H27N5O2
MK-8776 (SCH 900776)	376.25	CDK,Chk	3	7.97342	<1		MK-8776 (SCH 900776) is a selective Chk1 inhibitor with IC50 of 3 nM in a cell-free assay. It shows 500-fold selectivity against Chk2. Phase 2.	Cell Cycle	C15H18BrN7
CCT137690	551.48	Aurora Kinase	4	7.25321	<1		CCT137690 is a highly selective inhibitor of Aurora A, Aurora B and Aurora C with IC50 of 15 nM, 25 nM and 19 nM. It has little effect on hERG ion-channel.	Cell Cycle	C26H31BrN8O
Capmatinib (INCB28060)	412.42	c-Met	2	4.84943	<1		Capmatinib (INCB28060) is a novel, ATP-competitive inhibitor of c-MET with IC50 of 0.13 nM in a cell-free assay, inactive against RONβ, as well as EGFR and HER-3. Phase 1.	Protein Tyrosine Kinase	C23H17FN6O
LY364947	272.3	TGF-beta/Smad	1	3.67242	<1		LY364947 is a potent ATP-competitive inhibitor of TGFβR-I with IC50 of 59 nM in a cell-free assay, shows 7-fold selectivity over TGFβR-II.	TGF-beta/Smad	C17H12N4
Torin 1	607.62	Autophagy,mTOR	2	3.29153	<1		Torin 1 is a potent inhibitor of mTORC1/2 with IC50 of 2 nM/10 nM in cell-free assays exhibits 1000-fold selectivity for mTOR than PI3K.	PI3K/Akt/mTOR	C35H28F3N5O2
TG100713	254.25	PI3K	2	7.86627	<1		TG100713 is a pan-PI3K inhibitor against PI3Kγ, PI3Kδ, PI3Kα and PI3Kβ with IC50 of 50 nM, 24 nM, 165 nM and 215 nM, respectively.	PI3K/Akt/mTOR	C12H10N6O
NU7026	281.31	DNA-PK	1	3.5548	<1		NU7026 is a potent DNA-PK inhibitor with IC50 of 0.23 μM in cell-free assays, 60-fold selective for DNA-PK than PI3K and inactive against both ATM and ATR.	DNA Damage	C17H15NO3
Lupeol	426.72	Immunology & Inflammation related	1	2.34346	<1		Lupeol is a significant lupane-type triterpene represented in the plant, fungi and animal kingdoms with anticancer, antiprotozoal, chemopreventive and anti-inflammatory properties.	Immunology & Inflammation	C30H50O
Alectinib hydrochloride	519.08	ALK	2	3.85297	<1		Alectinib is a second generation oral drug that selectively inhibits the activity of anaplastic lymphoma kinase (ALK) tyrosine kinase.	Protein Tyrosine Kinase	C30H35ClN4O2
Toceranib phosphate	494.45	PDGFRβ	2	4.0449	2	4.0449	Toceranib phosphate is a multitargeted indolinone receptor tyrosine kinase (RTK) inhibitor with Kis of 5 and 6 nM for PDGFRβ and Flk-1/KDR, respectively.	Protein Tyrosine Kinase	C22H28FN4O6P
UNC2250	440.58	TAM Receptor	2	4.53947	<1		UNC2250 is a potent and selective Mer inhibitor with IC50 of 1.7 nM, about 160- and 60-fold selectivity over the closely related kinases Axl/Tyro3.	Protein Tyrosine Kinase	C24H36N6O2
ISRIB (trans-isomer)	451.34	PERK	4	8.8625	<1		ISRIB (trans-isomer), the trans-isomer of ISRIB, is a potent and selective PERK inhibitor with IC50 of 5 nM and does not have global effects on translation, transcription, or mRNA stability in non-stressed cells.	Apoptosis	C22H24Cl2N2O4
Defactinib (VS-6063, PF-04554878)	510.49	FAK	5	9.79451	<1		Defactinib (VS-6063, PF-04554878) is a selective, and orally active FAK inhibitor. Phase 2.	Angiogenesis	C20H21F3N8O3S
LY2584702	445.42	S6 Kinase	1	2.24507	<1		LY2584702 is a selective, ATP-competitive p70S6K inhibitor with IC50 of 4 nM. Phase 1.	PI3K/Akt/mTOR	C21H19F4N7
BLU9931	509.38	FGFR	4	7.85268	<1		BLU9931 is a potent, selective, and irreversible FGFR4 inhibitor with IC50 of 3 nM, about 297-, 184-, and 50-fold selectivity over FGFR1/2/3, respectively.	Angiogenesis	C26H22Cl2N4O3
Dorsomorphin (Compound C)	399.49	AMPK	1	2.50319	<1		Dorsomorphin is a potent, reversible, selective AMPK inhibitor with Ki of 109 nM in cell-free assays, exhibiting no significant inhibition of several structurally related kinases including ZAPK, SYK, PKCθ, PKA, and JAK3. Also inhibits type I BMP receptor activity.	PI3K/Akt/mTOR	C24H25N5O
LY3009120	424.51	Raf	3	7.06697	<1		LY03009120 is a potent pan-Raf inhibitor with IC50 of 44 nM, 31-47 nM, and 42 nM for A-raf, B-Raf, and C-Raf in A375 cells, respectively. Phase 1.	MAPK	C23H29FN6O
TP-0903	516.06	TAM Receptor	3	5.81328	<1		TP-0903 is a potent and selective AXL Inhibitor with IC50 of 27 nM.	Protein Tyrosine Kinase	C24H30ClN7O2S
FGF401	506.56	FGFR	5	9.8705	<1		FGF401 is an FGFR4-selective inhibitor with an IC50 of 1.1 nM. It binds in a reversible covalent manner to the FGFR4 kinase domain and shows at least 1,000 fold selectivity against of panel of 65 kinases in biochemical assays.	Protein Tyrosine Kinase	C25H30N8O4
Lazertinib (YH25448,GNS-1480)	554.643	EGFR	4	7.21185	<1		Lazertinib (YH25448,GNS-1480) is a potent, highly mutant-selective and irreversible EGFR-TKI with IC50 values of 1.7 nM, 2 nM, 5 nM, 20.6 nM and 76 nM for Del19/T790M, L858R/T790M, Del19, L85R and Wild type EGFR respectively, showing much higher IC50 values aganist ErbB2 and ErbB4.	Protein Tyrosine Kinase	C30H34N8O3
1,2,3,4,5,6-Hexabromocyclohexane	557.54	JAK	5	8.96797	<1		1,2,3,4,5,6-Hexabromocyclohexane is a potent inhibitor of <b>JAK2</b> tyrosine kinase autophosphorylation with IC50 value to be estimated in low micromolar range.	JAK/STAT	C6H6Br6
Resveratrol	228.24	Autophagy	45	197.161	<1		Resveratrol has a wide spectrum of targets including cyclooxygenases(i.e. COX, IC50=1.1 μM), lipooxygenases（LOX, IC50=2.7 μM）, kinases, sirtuins and other proteins. It has anti-cancer, anti-inflammatory, blood-sugar-lowering and other beneficial cardiovascular effects.	Autophagy	C14H12O3
Acetylcysteine	163.19	TNF-alpha,ROS	33	202.218	33	202.218	Acetylcysteine(N-acetyl-l-cysteine) is a ROS(reactive oxygen species) inhibitor that antagonizes the activity of proteasome inhibitors. It is also a tumor necrosis factor production inhibitor, used mainly as a mucolytic, protects against acetaminophen overdose-induced hepatotoxicity by maintaining or restoring hepatic concentrations of glutathione.	Apoptosis	C5H9NO3S
Vidarabine	267.24	DNA/RNA Synthesis	53	198.324	3	11.2259	Vidarabine is an antiviral drug by interfering with the synthesis of viral DNA, used to treat herpes simplex and varicella zoster viruses.	DNA Damage	C10H13N5O4
AICAR (Acadesine)	258.23	AMPK	51	197.498	<1		AICAR (Acadesine), an AMPK activator, results in accumulation of ZMP, which mimics the stimulating effect of AMP on AMPK and AMPK kinase. Phase 3.	PI3K/Akt/mTOR	C9H14N4O5
Nifedipine	346.33	Calcium Channel	69	199.232	<1		Nifedipine is a dihydropyridine calcium channel blocker, used to lower hypertension and to treat angina.	Transmembrane Transporters	C17H18N2O6
Oxfendazole	315.35	Anti-infection	10	31.7108	<1		Oxfendazole is a broad spectrum benzimidazole anthelmintic.	Microbiology	C15H13N3O3S
Metformin HCl	165.62	Autophagy	33	199.251	33	199.251	Metformin HCl decreases hyperglycemia in hepatocytes primarily by suppressing glucose production by the liver (hepatic gluconeogenesis).	Autophagy	C4H12ClN5
Benidipine HCl	542.02	Calcium Channel	8	14.7596	<1		Benidipine HCl is a hydrochloride salt form of benidipine which is a dihydropyridine calcium channel blocker.	Transmembrane Transporters	C28H32ClN3O6
Galunisertib (LY2157299)	369.42	TGF-beta/Smad	74	200.314	<1		Galunisertib (LY2157299) is a potent TGFβ receptor I (TβRI) inhibitor with IC50 of 56 nM in a cell-free assay. Phase 2/3.	TGF-beta/Smad	C22H19N5O
(-)-Epigallocatechin Gallate	458.37	DNA Methyltransferase,HER2,Telomerase,EGFR,Fatty Acid Synthase	72	157.078	23	50.1778	(-)-Epigallocatechin Gallate(EGCG) is the main catechin extraction of green tea that inhibits telomerase and DNA methyltransferase. EGCG blocks the activation of EGF receptors and HER-2 receptors. ECGG inhibits fatty acid synthase and glutamate dehydrogenase activity.	DNA Damage	C22H18O11
Asiatic Acid	488.7	p38 MAPK	97	198.486	<1		Asiatic acid is the aglycone of asiaticoside isolated from the plant Centella asiatica, commonly used in wound healing.	MAPK	C30H48O5
Emodin	270.24	Dehydrogenase	54	199.822	<1		Emodin is a purgative resin, 6-methyl-1,3,8-trihydroxyanthraquinone, from rhubarb, the buckthorn and Japanese Knotweed (Fallopia japonica).	Metabolism	C15H10O5
Ferulic Acid	194.19	Others	39	200.834	<1		Ferulic Acid is a hydroxycinnamic acid and a type of organic compound found in the Ferula assafoetida L. or Ligusticum chuanxiong.	Others	C10H10O4
Methyl-Hesperidin	642.59	Others	100	155.62	100	155.62	Methyl Hesperidin is a flavanone glycoside (flavonoid) (C28H34O15) found abundantly in citrus fruits. Its aglycone form is called hesperetin.	Others	C29H38O16
Myricitrin	464.38	PKC	93	200.267	<1		Myricitrin, a flavonoid compound isolated from the root bark of Myrica cerifera, which exerts antinociceptive effects.	TGF-beta/Smad	C21H20O12
Salidroside	300.3	Others	60	199.8	60	199.8	Salidroside, a phenylpropanoid glycoside isolated from Rhodiola rosea, has been reported to have a broad spectrum of pharmacological properties.	Others	C14H20O7
Dihydromyricetin	320.25	GABA Receptor,ROS	64	199.844	<1		Dihydromyricetin (Ampelopsin, Ampeloptin) is a natural antioxidant flavonoid from Ampelopsis grossedentata.	Neuronal Signaling	C15H12O8
Curcumol	236.35	JAK	47	198.858	<1		Curcumol is a pure monomer isolated from Rhizoma Curcumaeis with antitumor activities.	JAK/STAT	C15H24O2
Phenoxybenzamine HCl	340.3	Adrenergic Receptor	68	199.824	17	49.9559	Phenoxybenzamine HCl is a non-specific, irreversible alpha antagonist with an IC50 of 550 nM.	GPCR & G Protein	C18H23Cl2NO
Phenformin HCl	241.72	AMPK	48	198.577	48	198.577	Phenformin HCl is a hydrochloride salt of phenformin that is an anti-diabetic drug from the biguanide class. It activates AMPK, increasing activity and phosphorylation.	PI3K/Akt/mTOR	C10H16ClN5
Lonidamine	321.16	Others	64	199.278	<1		Lonidamine is an orally administered small molecule hexokinase inactivator.	Others	C15H10Cl2N2O2
A-769662	360.39	AMPK,Fatty Acid Synthase	72	199.784	<1		A-769662 is a potent, reversible AMPK activator with EC50 of 0.8 μM in cell-free assays, little effect on GPPase/FBPase activity.	PI3K/Akt/mTOR	C20H12N2O3S
Geldanamycin	560.64	HSP (e.g. HSP90),Autophagy	36	64.2123	<1		Geldanamycin is a natural existing HSP90 inhibitor with Kd of 1.2 μM, specifically disrupts glucocorticoid receptor (GR)/HSP association.	Cytoskeletal Signaling	C29H40N2O9
Lonafarnib	638.82	Transferase	127	198.804	<1		Lonafarnib is an orally bioavailable FPTase inhibitor for H-ras, K-ras-4B and N-ras with IC50 of 1.9 nM, 5.2 nM and 2.8 nM in cell-free assays, respectively. Phase 3.	Metabolism	C27H31Br2ClN4O2
Paroxetine HCl	365.83	AChR,5-HT Receptor	73	199.546	1	2.73351	Paroxetine HCl is an antidepressant drug of the SSRI type.	Neuronal Signaling	C19H21ClFNO3
Methylthiouracil	142.18	Others	28	196.933	<1		Methylthiouracil is an antithyroid preparation.	Others	C5H6N2OS
Fangchinoline	608.72	Reverse Transcriptase	100	164.279	<1		Fangchinoline, a bisbenzylisoquinoline alkaloid, is a novel HIV-1 inhibitor with pain-relieving, blood pressure-depressing, and antibiotic activities.	Microbiology	C37H40N2O6
Asiaticoside	959.12	ROS	100	104.262	<1		Asiaticoside, the major active principle of Centella asiatica, prevents ultraviolet A-dependent photoaging by suppressing ultraviolet A-induced reactive oxygen species production. It also decreases DNA binding by MITF.	Immunology & Inflammation	C48H78O19
2,3-Butanedione-2-monoxime	101.1	ATPase	20	197.824	20	197.824	2,3-Butanedione monoxime (BDM) is the well-characterized, low-affinity, non-competitive inhibitor of skeletal muscle myosin-II and inhibits skeletal and cardiac muscle contraction.	Transmembrane Transporters	C4H7NO2
Ginkgolide C	440.4	Others	88	199.818			Ginkgolide C, isolated from Ginkgo biloba leaves, is a flavone reported to have multiple biological functions, from decreased platelet aggregation to ameliorating Alzheimer disease.	Others	C20H24O11
Obacunone	454.51	Aromatase,Nrf2	90	198.015			Obacunone, a natural compound present in citrus fruits, has been demonstrated for various biological activities including anti-cancer and anti-inflammatory properties. It significantly inhibits aromatase activity in an in vitro enzyme assay with an IC50 value of 28.04 μM also a novel activator of Nrf2.	Endocrinology & Hormones	C26H30O7
Glabridin	324.37	GABA Receptor,PPAR	64	197.306			Glabridin, one of the active phytochemicals in licorice extract, binds to and activates the ligand binding domain of PPARγ, as well as the full length receptor. It is also a GABAA receptor positive modulator promoting fatty acid oxidation and improving learning and memory.	Metabolism	C20H20O4
Gentisic acid	154.12	Immunology & Inflammation related	30	194.654			Gentisic acid, an active metabolite of salicylic acid degradation, has a broad spectrum of biological activity, such as anti-inflammatory, antirheumatic and antioxidant properties.	Immunology & Inflammation	C7H6O4
Scutellarin	462.36	Others	50	108.141			Scutellarin, the major active principal flavonoids extracted from the Chinese herbal medicines Scutellaria baicalensis and Erigeron breviscapus (Vant.) Hand-Mazz, has many pharmacological effects, such as antioxidant, antitumor, antiviral, and antiinflammatory activities.	Others	C21H18O12
Ginsenoside Re	947.15	Others	100	105.58			Ginsenoside Re is a major ginsenoside in ginseng and belongs to 20(S)-protopanaxatriol group. It has diverse in vitro and in vivo effects, including vasorelaxant, antioxidant, antihyperlipidemic, and angiogenic actions.	Others	C48H82O18
Quercitrin	448.38	Immunology & Inflammation related	89	198.492			Quercitrin (3-rhamnosyl quercetin), a glycoside of quercetin, has been found as a main bioactive constituent in T. sinensis leaves and has antioxidant, anti-inflammatory, and anti-allergic activities.	Immunology & Inflammation	C21H20O11
6-Gingerol	294.39	Others	58	197.018			6-Gingerol is the active constituent of fresh ginger known to exhibit a variety of biological activities including anticancer, anti-inflammation, and anti-oxidation.	Others	C17H26O4
Harmine	212.25	PPAR,MAO	42	197.88			Harmine is an alkaloid of the β-carboline family that regulates PPARγ expression through inhibition of the Wnt signaling pathway. It also selectively binds to MAO-A and reversibly inhibits monoamine oxidase A (MAO-A) but not the variant MAO-B.	Metabolism	C13H12N2O
Astragaloside IV	784.97	Others	100	127.393			Astragaloside IV is a bioactive saponin first isolated from the dried plant roots of the genus Astragalus, which is used in traditional Chinese medicine. It has various effect on the cardiovascular, immune, digestive, and nervous systems.	Others	C41H68O14
Ginsenoside Rb1	1109.29	Others	100	90.1478			Ginsenoside Rb1 is a protopanaxadiol that has diverse in vitro and in vivo effects, including neuroprotective, anti-inflammatory, and anti-obesity actions.	Others	C54H92O23
Forsythin	534.55	Others	100	187.073			Forsythin (FOR) is an active ingredient extracted from the fruit of the medicinal plant Forsythia suspensa (Thunb.) Vahl and has been shown to have antioxidant, antibacterial and antiinflammatory properties.	Others	C27H34O11
Dicoumarol	336.29	Others	67	199.233	<1		Dicoumarol is a competitive NADPH quinone oxidoreductase (NQO1) inhibitor,and used as an anticoagulant by interfering with the metabolism of vitamin K.	Others	C19H12O6
Citric acid trilithium salt tetrahydrate	281.98	Others	56	198.596	56	198.596	Citric acid trilithium salt tetrahydrate is a pharmaceutical and construction material. It is commonly used in HPLC gradient elution for quantification of amino acids.	Others	C6H13Li3O11
Vitamin E	430.71	COX,VEGFR	The physical form of the compound is liquid, which can be dissolved in any proportion.				Vitamin E is a fat-soluble vitamin with potent antioxidant properties. It is a potent peroxyl radical scavenger and inhibits noncompetitively cyclooxygenase activity in many tissues, also inhibits angiogenesis and tumor dormancy through suppressing vascular endothelial growth factor (VEGF) gene transcription.	Neuronal Signaling	C29H50O2
2-Deoxy-D-glucose	164.16	Others	32	194.932	32	194.932	2-Deoxy-D-glucose, an analog of glucose, is a glycolytic inhibitor with antiviral activity.	Others	C6H12O5
Perphenazine	403.97	Dopamine Receptor	74	183.182	<1		Perphenazine is a phenothiazine derivative and a dopamine antagonist with antiemetic and antipsychotic properties.	Neuronal Signaling	C21H26ClN3OS
Trans-Zeatin	219.24	Others	43	196.132	<1		Trans-Zeatina is the member of the plant growth hormone family known as cytokinins, which regulate cell division, development, and nutrient processing.	Others	C10H13N5O
Fingolimod (FTY720) HCl	343.9	S1P Receptor	69	200.64	69	200.64	Fingolimod (FTY720) HCl is a S1P antagonist with IC50 of 0.033 nM in K562, and NK cells.	GPCR & G Protein	C19H34ClNO2
Nomilin	514.56	Others	100	194.341	<1		Nomilin is a triterpenoid present in common edible citrus fruits with putative anticancer properties.	Others	C28H34O9
Metadoxine	298.29	Others	59	197.794			Metadoxine, also known as pyridoxine-pyrrolidone carboxylate, is a drug used to treat chronic and acute alcohol intoxication.	Others	C13H18N2O6
Olivetol	180.24	Cannabinoid Receptor	100	554.816			Olivetol is a naturally occurring organic compound being a precursor in various syntheses of tetrahydrocannabinol. It acts as a competitive inhibitor of the cannabinoid receptors CB1 and CB2.	GPCR & G Protein	C11H16O2
Adenosine 5'-monophosphate monohydrate	365.24	AMPK	9	24.6413			Adenosine 5'-monophosphate monohydrate (5'-AMP) is an activator of a class of protein kinases known as AMP-activated protein kinase (AMPK).	PI3K/Akt/mTOR	C10H16N5O8P
Bromopyruvic acid	166.96	Others	33	197.652			Bromopyruvic acid is a hexokinase II inhibitor with Ki of 2.4 mM for glycolysis/hexokinase inhibition. It is inhibitor of tumour cell energy metabolism and chemopotentiator of platinum drugs.	Others	C3H3BrO3
Ferulic acid methyl ester	208.21	Immunology & Inflammation related	41	196.917	41	196.917	Methyl ferulate is a lipophilic derivative of ferulic acid, which is a hydroxycinnamic acid that is abundant in plants. It shows the strongest antioxidant activity and can protect against inflammation and cancer.	Immunology & Inflammation	C11H12O4
Sanguinarine chloride	367.78	phosphatase	5	13.5951	<1		Sanguinarine, a plant alkaloid, is a potent and specific protein phosphatase (PP) 2C inhibitor.	Others	C20H14ClNO4
Galangin	270.24	P450 (e.g. CYP17)	54	199.822	<1		Galangin, a naturally occuring flavonoid found in herbs, is a well-known antioxidant and also an inhibitor of CYP1A1 activity and an agonist/antagonist of the aryl hydrocarbon receptor.	Metabolism	C15H10O5
Cinchocaine	343.46	Others	68	197.985			Cinchocaine is a potent and long-acting local anesthetics used for surface anesthesia.	Others	C20H29N3O2
Ethyl gallate	198.17	NF-κB	39	196.801			Ethyl gallate obviously decreases cell proliferation in MDA-MB-231 and MCF-7 cells in a dose- and time-dependent manner, exhibits cytotoxicity in a dose-dependent manner.	PI3k-Akt	C9H10O5
Chloropyramine hydrochloride	326.26	Histamine Receptor	65	199.228	-1		Chloropyramine hydrochloride is a <b>histamine receptor H1</b> antagonist and has anti-cholinergic, antispasmodic, and antiallergic effects.	Neuronal Signaling	C16H21Cl2N3
10058-F4	249.35	c-Myc	49	196.511	<1		10058-F4 is a c-Myc inhibitor that specificallly inhibits the c-Myc-Max interaction and prevents transactivation of c-Myc target gene expression.	Cell Cycle	C12H11NOS2
SRPIN340	349.35	Others	70	200.372	<1		SRPIN340 is a selective SRPK inhibitor with Ki of 0.89 μM for SRPK1, showing no significant inhibitory activity against more than 140 other kinases..	Others	C18H18F3N3O
4μ8C	204.18	Others	19	93.0551	<1		4μ8C is a potent and selective IRE1 Rnase inhibitor with IC50 of 76 nM.	Others	C11H8O4
EHop-016	430.55	Rho	86	199.745	<1		EHop-016 is a specific Rac GTPase inhibitor with IC50 of 1.1 μM for Rac1 in MDA-MB-435 and MDA-MB-231 cells, equally potent inhibition for Rac3.	Cell Cycle	C25H30N6O
4EGI-1	451.28	Others	90	199.433	<1		4EGI-1 is a competitive eIF4E/eIF4G interaction inhibitor by binding to eIF4E with KD of 25 μM.	Others	C18H12Cl2N4O4S
4E1RCat	478.45	Others	96	200.648	<1		4E1RCat is a dual inhibitor of eIF4E:eIF4G and eIF4E:4E-BP1 interaction, and inhibits the binding of eIF4G to eIF4E with IC50 of 3.2 μM.	Others	C28H18N2O6
Anisomycin	265.3	JNK	41	154.542	<1		Anisomycin is an antibiotic, which inhibits protein synthesis, and also act as a JNK activator.	MAPK	C14H19NO4
Sal003	463.21	phosphatase	93	200.773	<1		Sal003 is a potent and cell-permeable eIF-2α phosphatase inhibitor.	Others	C18H15Cl4N3OS
EHT 1864 2HCl	581.47	Rho	100	171.978	100	171.978	EHT 1864 2HCl is a potent Rac family GTPase inhibitor with Kd of 40 nM, 50 nM, 60 nM and 250 nM for Rac1, Rac1b, Rac2 and Rac3, respectively.	Cell Cycle	C25H29Cl2F3N2O4S
AZD7545	478.87	Others	95	198.384	<1		AZD7545 is a potent PDHK inhibitor with IC50 of 36.8 nM and 6.4 nM for PDHK1 and PDHK2, respectively. It failed to inhibit PDHK4 at higher concentrations(>10 nM), AZD7545 stimulates PDHK4 activity.	Others	C19H18ClF3N2O5S
Piperlongumine	317.34	ROS,CRM1	16	50.4191	<1		Piperlongumine, a natural alkaloid from Piper longum L., increases the level of reactive oxygen species (ROS) and selectively kills cancer cells. It is a direct TrxR1 inhibitor with suppressive activity against gastric cancer and a novel inhibitor of CRM1 also an inhibitor of PI3K/Akt/mTOR in human breast cancer cells.	Immunology & Inflammation	C17H19NO5
STF-083010	317.38	Others	63	198.5	<1		STF-083010 is a specific IRE1α endonuclease inhibitor without affecting its kinase activity.	Others	C15H11NO3S2
MHY1485	387.39	mTOR,Autophagy	4	10.3255	<1		MHY1485 is a potent, and cell-permeable mTOR activator, and also potently inhibits autophagy.	PI3K/Akt/mTOR	C17H21N7O4
OICR-9429	555.59	Histone Methyltransferase	38	68.3958	<1		OICR-9429 is a potent antagonist of the interaction of WDR5 with peptide regions of MLL and Histone 3 and reduces viability of acute myeloid leukemia cells in vitro. It binds to WDR5 with high affinity (KD = 93 ± 28 nM.	Epigenetics	C29H32F3N5O3
Sodium Tauroursodeoxycholate (TUDC)	521.69	Anti-infection	100	191.685	100	191.685	Sodium Tauroursodeoxycholate (TUDC) is a water soluble bile salt, used for the treatment of gallstones and liver cirrhosis.	Microbiology	C26H44NNaO6S
GSK621	489.91	AMPK	97	197.996	<1		GSK621 is a specific and potent AMPK activator.	PI3K/Akt/mTOR	C26H20ClN3O5
MCB-613	304.39	Others	60	197.116	<1		MCB-613 is a potent steroid receptor coactivator (SRC) stimulator.	Others	C20H20N2O
DASA-58	453.53	PKM	91	200.648	<1		DASA-58 is a specific and potent Pyruvate kinase M2 (PKM2) activator.	Metabolism	C19H23N3O6S2
ETC-1002	344.49	AMPK,LDL	68	197.393	<1		ETC-1002,also known as Bempedoic acid, is an orally available, once-daily LDL-C lowering small molecule designed to lower elevated levels of LDL-C and to avoid side effects associated with existing LDL-C lowering therapies.ETC-1002 is an activator of hepatic AMP-activated protein kinase (AMPK). It has potent inhibitory activity against hepatic ATP-citrate lyase(IC50=29 uM).	PI3K/Akt/mTOR	C19H36O5
Necrostatin-1	259.33	TNF-alpha	51	196.661	<1		Necrostatin-1 is a specific RIP1 inhibitor and inhibits TNF-α-induced necroptosis with EC50 of 490 nM in 293T cells.	Apoptosis	C13H13N3OS
SUN11602	451.6	FGFR	90	199.291	<1		SUN11602 is a small synthetic compound that mimics the neuroprotective activities of bFGF and activates key molecules in the FGF receptor-1-mitogen-activated protein kinase/extracellular signal-regulated kinase-1/2 kinase (FGFR-1-MEK/ERK) signaling pathway.	Angiogenesis	C26H37N5O2
Shikonin	288.3	Chloride Channel,Anti-infection	57	197.711	<1		Shikonin, a potent and specific Pyruvate kinase M2 (PKM2) inhibitor, is a major component of zicao (purple gromwell, the dried root of Lithospermum erythrorhizon), a Chinese herbal medicine with various biological activities. It is also an inhibitor of TMEM16A chloride channel activity using cell-based fluorescent-quenching assay.	Microbiology	C16H16O5
MKC-3946	380.46	Others	38	99.8791	<1		MKC3946 is a potent and soluble IRE1α endoribonuclease domain inhibitor which triggered modest growth inhibition in multiple myeloma cell lines, without toxicity in normal mononuclear cells.	Others	C21H20N2O3S
Kobe0065	449.79	Rho	89	197.87	<1		Kobe0065 is H-Ras-cRaf1 interaction inhibitor, exhibiting potent activity to competitively inhibit the binding of H-Ras·GTP to c-Raf-1 RBD with a Ki value of 46 ± 13 μM.	Cell Cycle	C15H11ClF3N5O4S
NSC228155	290.25	EGFR	15	51.6796	<1		NSC228155 is an activator of EGFR. It binds to the sEGFR dimerization domain II and modulates EGFR tyrosine phosphorylation.	Angiogenesis	C11H6N4O4S
5-Iodotubercidin	392.15	Adenosine Receptor	78	198.903	<1		5-Iodotubercidin is a potent adenosine kinase inhibitor with IC50 of 26 nM. It inhibits nucleoside transporter, CK1, insulin receptor tyrosine kinase, phosphorylase kinase, PKA, CK2 and PKC.	GPCR & G Protein	C11H13IN4O4
7,8-Dihydroxyflavone	254.24	Trk receptor	50	196.665	<1		7,8-Dihydroxyflavone acts as a potent and selective small-molecule agonist of the TrkB receptor (Kd ≈ 320 nM), the main signaling receptor of brain-derived neurotrophic factor (BDNF).	Protein Tyrosine Kinase	C15H10O4
PF-06409577	341.79	AMPK	68	198.953	<1		PF-06409577 is orally bioavailable AMPK activator with EC50 of 7 nM for α1β1γ1 in the TR-FRET assay and it shows no detectable inhibition of hERG in a patch-clamp assay (100 μM) and was not an inhibitor (IC50 > 100 μM) of the microsomal activities of major human cytochrome P450 isoforms.	PI3K/Akt/mTOR	C19H16ClNO3
ex229 (compound 991)	431.87	AMPK	12	27.7861	<1		EX229 (compound 991) is a potent <b>AMPK</b> activator that is 5-10-fold more potent than A769662 in activating AMPK.	PI3K/Akt/mTOR	C24H1ClN3O3
IITZ-01	482.51	Autophagy	100	207.25	<1		IITZ-01 is a potent <b>autophagy</b> inhibitor, enhancing autophagosome accumulation but inhibiting autophagosomal degradation by impairing lysosomal function.	Autophagy	C26H23FN8O
MK-3903	454.9	AMPK	91	200.044	<1		MK-3903 is a potent and selective <b>AMPK</b> activator with an EC50 of 8 nM for α1 β1 γ1 subunit. It activates 10 of the 12 pAMPK complexes with EC50 values in the range of 8-40 nM and maximal activation >50%.	PI3K/Akt/mTOR	C27H19ClN2O3
20S-Ginsenoside Rh2	622.873	Cancer	10	16.0546			Ginsenoside Rh2 is isolated from the root of Ginseng. Ginsenoside Rh2 induces the activation of caspase-8 and caspase-9. Ginsenoside Rh2 induces cancer cell apoptosis in a multi-path manner.	Apoptosis,Caspase	C36H62O8
Corosolic acid	472.7	Others	95	200.973			Corosolic acid (CRA), a constituent of banaba leaves, has been reported to have anti-inflammatory and hypoglycemic activities, it can ameliorate hypertension, abnormal lipid metabolism, and oxidative stress as well as the inflammatory state in SHR-cp rats, suggests CRA can be beneficial for preventing atherosclerosis-related diseases. Corosolic acid significantly inhibits cell viability in both a…	Others	C30H48O4
Anhydroicaritin	368.38	Others	10	27.1459			Icaritin has hormone regulation activity. Icaritin has cardiovascular function improvement activity. Icaritin has anticancer activity, can induce S phase arrest and apoptosis, inhibit ENKL cell proliferation. Icaritin has anti-MM activity, mainly mediated by inhibiting IL-6/JAK2/STAT3 signaling. Icariside II inhibits pre-osteoclast RAW264.7 growth , which maybe contribute to the efficiency of Her…	Others	C21H20O6
ligustroflavone	724.66	Others	10	13.7996			Ligustroflavone has anti-inflammatory activity.	Cancer	C33H40O18
Isorhamnetin	316.262	PXR	63	199.202			Isorhamnetin on experimental IBD via PXR-mediated up-regulation of xenobiotic metabolism and down-regulation of NF-κB signaling. Isorhamnetin is efficacious in protecting hepatocytes against oxidative stress by Nrf2 activation and in inducing the expressions of its downstream genes. Isorhamnetin may contribute to blockade of the host-destructive processes mediated by IL-6 and could be a highly ef…	NF-κB	C16H12O7
Chikusetsusaponin IVa	794.965	AMPK	100	125.792			Chikusetsusaponin IVa is a novel AMPK activator, can induce insulin secretion from βTC3 cells via GPR4 mediated calcium and PKC pathways, may be developed into a new potential for therapeutic agent used in T2DM patients.	Cancer	C42H66O14
(20S)Ginsenoside Rg2	785.013	GSK-3β	100	127.386			Ginsenoside Rg2 is one of the major active components of ginseng, act as an NF-κB inhibitor.	Cancer	C42H72O13
Scutellarein	286.236	Src	57	199.136			Scutellarein reduces inflammatory responses by inhibiting Src kinase activity.	Cancer	C15H10O6
Carnosol	330.418	Others	66	199.747			One of the phenolic antioxidants present in extracts of rosemary; inhibits the formation of tumors derived using irritants such as TPA and DMBA	cancer	C20H26O4
Solamargine	868.059	Cancer	100	115.2			Solamargine is a major steroidal alkaloid glycoside extracted from a traditional Chinese medicinal herb, Solanum nigrum L. (SNL); has been shown to inhibit growth and induce apoptosis of various cancer cells.	Others	C45H73NO15
Epiberberine	336.361	GMNN - geminin, DNA replication inhibitor (human)	12	35.6759			A quantitative high throughput screen for small molecules that induce DNA re-replication in MCF 10a normal breast cells.	Others	C20H18NO4+
Rubimaillin	284.307	Others	22	77.3813			Inhibition of thrombin-induced platelet aggregation in rabbit platelet assessed as aggregation at 300 uM treated 3 mins before thrombin challenge by turbidimetric method	Others	C17H16O4
Gypenoside XVII	947.154	GSK-3β	100	105.579			Gypenoside XVII confers protection against Aβ25-35-induced neurotoxicity through estrogen receptor-dependent activation of PI3K/Akt pathways, activation of Nrf2/ARE/HO-1 and inactivation of GSK-3β pathways.	Cancer	C48H82O18
Decursin	328.359	Others	66	200.999			Decursin is able to attenuate kainic acid-induced seizures and could have potential as an antiepileptic drug. Decursin exhibits hepatoprotective effects , potentially by inhibiting the TGF-β1 induced NOX activation and Smad signaling. Decursin has anti-cancer activity , mediated suppression of the PKCα, MAPK and NF-κB pathways in MCF-7 cells. Decursin exhibits cytotoxicity against various human c…	Others	C19H20O5
Atractylenolide II	232.318	STAT3	46	198.004			Atractylenolide II has antimelanoma effect by inhibiting STAT3 signalling. Atractylenolide II has cytotoxic/apoptotic effects may via p38 activation ,ERK and Akt inactivation, p53 dependent. Atractylenolide II can inhibit platelets activities and thrombus formation. Atractylenolide II has antiinflammatory activity.	Others	C15H20O2
Praeruptorin A	386.395	NF-κB	77	199.278			Praeruptorin A may exert antiinflammatory effects in vitro in LPS-stimulated RAW 264.7 macrophages through inhibition of NF-κB signal pathway activation. Praeruptorin A and praeruptorin C can significantly up-regulate UGT1A1 expression in HepG2 cells partially via the CAR-mediated pathway. (+)-Praeruptorin A exerts distinct relaxant effects on isolated rat aorta rings, which may be mainly attribu…	NF-κB	C21H22O7
Anthraquinone-2-carboxylic Acid	252.222	IRAK-1	50	198.238			Anthraquinone-2-carboxylic acid acts as a potent anti-inflammatory and antinociceptive component in vivo, thus contributing to the immune regulatory role of fruits and herbs.	Cancer	C15H8O4
Sophocarpine Monohydrate	264.363	AMPK	52	196.699			Sophocarpine and matrine exert anti-cachectic effects probably through inhibition of TNF-alpha and IL-6 and prevent cachexia-related symptoms induced by colon26 adenocarcinoma in mice. Sophocarpine injection (called the Kangke injection) has been demonstrated to have significant antivirus effects against coxsackievirus B3 and therapeutic effects for viral myocarditis in clinical. Sophocarpine exe…	AMPK	C15H24N2O2
(+)-Praeruptorin A	386.395	CAM	77	199.278			Praeruptorin A has the potential to inhibit migration/fusion of preosteoclasts in vitro and bone erosion in vivo by targeting calmodulin and inhibiting the Ca(2+)/calmodulin-CaMKIV-CREB-NFATc1 and/or Ca(2+)/calmodulin-calcineurin-NFATc1 signaling axis.	Cancer	C21H22O7
Phorbol	364.433	PKC	72	197.567			Phorbol, a plant-derived diterpene, is a tumor promoter through the activation of protein kinase C.	Cancer	C20H28O6
6-(Dimethylamino)purine	163.18	Serine/threonin kina	32	196.102			6-Dimethylaminopurine is a <b>serine threonine protein kinase</b> inhibitor. It inhibits the germinal vesicle breakdown and the meiotic maturation of oocytes.	Apoptosis	C7H9N5_x000D_
SAR125844	550.63	c-Met	11	19.9771	<1		SAR125844 is a potent intravenously active and highly selective <b>MET</b> kinase inhibitor, displaying nanomolar activity against the wild-type kinase (IC50 value of 4.2 nmol/L) and H1094Y, Y1235D, M1250T, L1195V, and D1228H kinase domain mutants (IC50 values of 0.22, 1.7, 6.5, 65, and 81 nmol/L, respectively).	Protein Tyrosine Kinase	C25H23FN8O2S2_x000D_
Theliatinib (HMPL-309)	442.51	EGFR	47	106.212			Theliatinib (HMPL-309) is a highly potent <b>EGFR</b> inhibitor with Ki value of 0.05 nM against the wild type EGFR and IC50 values of 3 nM and 22 nM against EGFR and EGFR T790M/L858R mutant. It demonstrats 50 fold greater selectivity for EGFR compared to 72 other kinases.	Protein Tyrosine Kinase	C25H26N6O2_x000D_
AZ304	451.52	Raf	90	199.327	<1		AZ304 is a synthetic inhibitor designed to interact with the ATP-binding site of <b>wild type and V600E mutant BRAF</b> with IC50 values of 79 nM and 38 nM, respectively. It also inhibits <b>CRAF, p38 and CSF1R</b> at sub 100 nM potencies.	MAPK	C27H25N5O2_x000D_
PF-04965842	323.41	JAK	65	200.983	<1		PF-04965842 is a potent <b>JAK1</b> inhibitor with IC50s of 29 nM, 803 nM, > 10 000 nM and 1250 nM for JAK1, JAK2, JAK3 and tyrosine kinase (TYK) 2, respectively.	JAK/STAT	C14H21N5O2S_x000D_
AZD3229	479.51	c-Kit	96	200.204	<1		AZD3229 is a potent, pan-<b>KIT mutant</b> inhibitor with potent single digit nM growth inhibition against a diverse panel of mutant KIT driven Ba/F3 cell lines (GI50=1-50 nM), with good margin to KDR-driven effects. It also inhibits <b>PDGFR mutants</b> (Tel-PDGFRα, Tel-PDGFRβ, V561D/D842V).	Protein Tyrosine Kinase	C24H26FN7O3_x000D_
GSK'547	396.39	TNF-alpha	29	73.1603	<1		GSK'547 is a highly selective and potent inhibitor of <b>RIP1</b> exhibiting a 400-fold improvement in mouse pharmacokinetic oral exposure compared with GSK'963	Apoptosis	C20H18F2N6O_x000D_
PFK158	328.29	Autophagy	14	42.6452	<1		PFK158 is a potent and selective inhibitor of <b>PFKFB3</b>. It has improved PK properties and causes ~80% growth inhibition in several mouse models of human-derived tumors.	Autophagy	C18H11F3N2O_x000D_
SPHINX31	507.51	Serine/threonin kina	25	49.2601	<1		SPHINX31 is a <b>SRPK1</b> inhibiror with an IC50 of 5.9 nM with highly selectivity for SRPK1 over SRPK2 (50-fold) and CLK1 (100-fold).	Protein Tyrosine Kinase	C27H24F3N5O2_x000D_
Chelerythrine Chloride	384.83	PKC	4	10.3942	<1		Chelerythrine is a potent, selective antagonist of <b>PKC</b> with <b>IC50</b> of 0.66 mM.	TGF-beta/Smad	C21H18NO4.HCl_x000D_
BGJ398 (NVP-BGJ398|Infigratinib)	560.48	FGFR	27	48.173	<1		BGJ398 (NVP-BGJ398) is a potent and selective <b>FGFR</b> inhibitor for FGFR1/2/3 with <b>IC50</b> of 0.9 nM/1.4 nM/1 nM in cell-free assays, >40-fold selective for FGFR versus FGFR4 and VEGFR2, and little activity to Abl, Fyn, Kit, Lck, Lyn and Yes. Phase 2.	Angiogenesis	C26H31Cl2N7O3_x000D_
Evodiamine	303.36	NF-κB	12	39.557	<1		Evodiamine (Isoevodiamine), an alkaloid extract from the fruit of Evodiae Fructus exhibits antitumor activities against the human tumor cells. It is shown to inhibit <b>NF-kB</b> activation through suppression of <b>IkB kinase</b> activity.	NF-κB	C19H17N3O_x000D_
I-BET151 (GSK1210151A)	415.44	Epigenetic Reader Do	83	199.788	<1		I-BET151 (GSK1210151A) is a novel selective BET inhibitor for <b>BRD2</b>, <b>BRD3</b> and <b>BRD4</b> with <b>IC50</b> of 0.5 μM, 0.25 μM, and 0.79 μM in cell-free assays, respectively.	Epigenetics	C23H21N5O3_x000D_
Apilimod	418.49	PI3K	84	200.722	-1		Apilimod is a cell permeable small molecule that specifically inhibits <b>PIKfyve</b> with an IC50 of 14 nM in an in vitro kinase assay. It is also an inhibitor of <b>IL-12/23</b> and shows no activity toward other lipid kinases and protein kinases, including PIP4K, PIP5K, mTOR, PI3K and PI4K isoforms.	PI3K/Akt/mTOR	C23H26N6O2_x000D_
PF 429242	409.56	S1P Receptor	82	200.215	-1		PF 429242 is known as a <b>S1P</b> inhibitor with an IC50 of 170 nM, showing no significant inhibition of trypsin, elastase, proteinase K, plasmin, kallikren, factor XIa, thrombin, or furin at concentrations up to 100 μM and only modest inhibition of urokinase (IC50 = 50 μM) and factor Xa (IC50 = 100 μM).	GPCR & G Protein	C25H35N3O2_x000D_
TAS-301	357.4	Others	71	198.657	-1		TAS-301 is an inhibitor of smooth muscle cell migration and proliferation and inhibits intimal thickening after balloon injury to rat carotid arteries.	Others	C23H19NO3_x000D_
GLPG0634 analogue	410.43	JAK	82	199.79	<1		GLPG0634 analogue is a selective <b>JAK1</b> inhibitor with <b>IC50</b> of 10 nM, 28 nM, 810 nM, and 116 nM for JAK1, JAK2, JAK3, and TYK2, respectively. Phase 2._x000D_	JAK/STAT	C23H18N6O2_x000D_
Selective JAK3 inhibitor 1	350.37	JAK	70	199.789	<1		Selective JAK3 inhibitor 1 is an irreversible <b>JAK3</b> inhibitor with Ki values of 0.07 nM, 320 nM, 740 nM for JAK3, JAK1 and JAK2 respectively. It is also selective over the other kinases possessing a cysteine in the same region as JAK3, such as BMX, EGFR, ITK, and BTK.	JAK/STAT	C19H18N4O3_x000D_
Selective PI3Kδ Inhibitor 1 (compound 7n)	429.45	PI3K	43	100.128	<1		Selective PI3Kδ Inhibitor 1 (compound 7n) is an inhibitor of <b>PI3Kδ</b> with an IC50 of 0.9 nM and >1000-fold selectivity against other class I PI3K isoforms [PI3K α/γ/β=3670/1460/21300 nM].	PI3K/Akt/mTOR	C23H20FN7O_x000D_
MK-8353 (SCH900353)	691.84	ERK	50	72.271	<1		MK-8353 (SCH900353) is an orally bioavailable, selective, and potent <b>ERK</b> inhibitor that inhibits activated ERK1 and ERK2 in vitro, with IC50 values of 23.0 nM and 8.8 nM, respectively (IMAP kinase assay), and nonactivated ERK2, with an IC50 of 0.5 nM (MEK1-ERK2-coupled assay).	MAPK	C37H41N9O3S_x000D_
INCB054329（INCB-054329,INCB-54329）	348.36	Epigenetic Reader Do	70	200.942	˂1		INCB054329(INCB-054329; INCB-54329) is a structurally distinct <b>bromodomain and extraterminal domain (BET)</b> inhibitor with IC50 values of 44 nM, 5 nM, 9 nM, 1 nM, 28 nM, 3 nM, 119 nM and 63 nM for BRD2-BD1, BRD2-BD2, BRD3-BD1, BRD3-BD2, BRD4-BD1, BRD4-BD2, BRDT-BD1 and BRDT-BD2, respectively.	Epigenetics	C19H16N4O3_x000D_
CH7057288	569.67	Trk receptor	100	175.54	<1		CH7057288 is a potent and selective <b>TRK</b> inhibitor with IC50 values of 1.1 nM, 7.8 nM and 5.1 nM for TRKA, TRKB, and TRKC respectively.	Protein Tyrosine Kinase	C32H31N3O5S_x000D_
Zanubrutinib (BGB-3111)	471.55	BTK	94	199.343	<1		Zanubrutinib (BGB-3111) is a potent, specific and irreversible <b>BTK</b> inhibitor that has been shown to have a lower off-target inhibitory activity on other kinases, including ITK, JAK3 and EGFR.	Protein Tyrosine Kinase	C27H29N5O3_x000D_
ULK-101	460.45	Autophagy	92	199.805	<1		ULK-101 is a potent and selective <b>ULK1</b> inhibitor with IC50 values of 8.3 nM and 30 nM for ULK1 and ULK2, respectively.	Autophagy	C22H16F4N4OS
PF-06700841	389.4	JAK	78	200.308	<1		PF-06700841 is a potent inhibitor of <b>Tyk2</b> and <b>Jak1</b> with IC50s of 23 nM, 17 nM, 77 nM for Tyk2, Jak1 and Jak2 respectively. It has appropriate in-family selectivity against JAK2 and JAK3.	JAK/STAT	C18H21F2N7O_x000D_
HS-10296	525.64	EGFR	100	190.244	<1		HS-10296 is a small molecule inhibitor of <b>EGFR-activating mutations and T790M-resistant mutation</b> with limited activity against wild-type EGFR.	Protein Tyrosine Kinase	C30H35N7O2_x000D_
GSK3179106	467.41	c-RET	93	198.969	<1		GSK3179106 is a potent, selective, and gut-restricted pyridone hinge binder small molecule <b>RET kinase</b> inhibitor with a RET IC50 of 0.3 nM and is efficacious in vivo.	Apoptosis	C22H21F4N3O4_x000D_
SEL120 (SEL120-34，SEL120-34A)	450.6	CDK	11	24.4119	90	199.734	SEL120(SEL120-34,SEL120-34A) is a novel inhibitor of <b>Cyclin-dependent kinase 8 (CDK8)</b> with IC50 values of 4.4 nM and 10.4 nM for CDK8/Cyclin C and CDK19/CyclinC respectively.	Cell Cycle	C15H19Br2ClN4_x000D_
Chloroquine Phosphate	515.86	Autophagy,ATM/ATR	<1		100	193.851	Chloroquine phosphate is a 4-aminoquinoline anti-malarial and anti-rheumatoid agent, also acting as an ATM activator.	PI3K/Akt/mTOR	C18H32ClN3O8P2
Sodium Houttuyfonate	330.42	Anti-infection	2	6.0529	<1		Sodium Houttuyfonate, the active compound of the Houttuynia plant, is mainly used for treating purulent skin infections, respiratory tract infections, including pneumonia in elderly patients, and chronic bronchitis.	Microbiology	C14H27NaO5S
Brigatinib (AP26113)	584.09	ALK	3	5.13619	<1		Brigatinib (AP26113) is a potent and selective <b>ALK</b> (IC50, 0.6 nM) and <b>ROS1</b> (IC50, 0.9 nM) inhibitor. It also inhibits ROS1, FLT3, and mutant variants of FLT3 (D835Y) and EGFR with lower potentcy.	Angiogenesis	C29H39ClN7O2P_x000D_
